# Supplementary material for: N-Iodosuccinimide and dioxygen in an air-enabled synthesis of 10-phenanthrenols under sunlight
Source: Royal Society of Chemistry journal article supplement (doi:10.1039/d1gc02185k), 2021-01-01
Supplement: d1gc02185k1.pdf [file d1gc02185k1.pdf]

## Supporting Information

### ***N*-Iodosuccinimide and dioxygen in air enabled synthesis of 10-phenanthrenols under sunlight**

Jia-Dong Guo,<sup>a,b</sup> Xiu-Long Yang,<sup>a,b</sup> Bin Chen,<sup>a,b</sup> Chen-Ho Tung,<sup>a,b</sup> and

Li-Zhu Wu<sup>\*a,b</sup>

<sup>a</sup>Key Laboratory of Photochemical Conversion and Optoelectronic Materials, Technical Institute of Physics and Chemistry, The Chinese Academy of Sciences, Beijing 100190, P.R. China

<sup>b</sup>School of Future Technology, University of Chinese Academy of Sciences, Beijing, 100049, P. R. China

E-mail: lzwu@mail.ipc.ac.cn

# Table of Contents

|                                                                                                                                           |     |
|-------------------------------------------------------------------------------------------------------------------------------------------|-----|
| 1. General information .....                                                                                                              | S1  |
| 2. Substrates preparation.....                                                                                                            | S2  |
| 2.1 Synthesis of <b>1a–1z</b> .....                                                                                                       | S2  |
| 2.2 Synthesis of methyl 3-([1,1'-biphenyl]-2-yl)-3-oxopropanoate ( <b>1aa</b> ) .....                                                     | S4  |
| 2.3 Synthesis of benzyl 3-([1,1'-biphenyl]-2-yl)-3-oxopropanoate ( <b>1ab</b> ) .....                                                     | S4  |
| 2.4 Synthesis of 1-([1,1'-biphenyl]-2-yl)-3-phenylpropane-1,3-dione ( <b>1ac</b> ).....                                                   | S5  |
| 2.5 Synthesis of 3-([1,1'-biphenyl]-2-yl)-3-oxo-N-phenylpropanamide ( <b>1ad</b> ) .....                                                  | S5  |
| 2.6 Synthesis of 3-([1,1'-biphenyl]-2-yl)-3-oxopropanenitrile ( <b>1ae</b> ) .....                                                        | S5  |
| 2.7 Synthesis of 1-([1,1'-biphenyl]-2-yl)-2-(methylsulfonyl)ethan-1-one ( <b>1af</b> ) .....                                              | S6  |
| 2.8 Synthesis of ethyl 3-oxo-3-(2-(pyridin-2-yl)phenyl)propanoate ( <b>1ag</b> ).....                                                     | S6  |
| 2.9 Synthesis of ethyl 3-(2-(1-methyl-1H-indol-3-yl)phenyl)-3-oxopropanoate ( <b>1ah</b> ).....                                           | S7  |
| 2.10 Synthesis of ethyl 3-(2-(furan-2-yl)phenyl)-3-oxopropanoate ( <b>1ai</b> ) .....                                                     | S8  |
| 2.11 Synthesis of ethyl 3-oxo-3-(2-(thiophen-2-yl)phenyl)propanoate ( <b>1aj</b> ).....                                                   | S9  |
| 2.12 Synthesis of ethyl 3-([1,1'-biphenyl]-2-yl)-2-iodo-3-oxopropanoate ( <b>[I]-1a</b> ).....                                            | S9  |
| 2.13 Synthesis of ethyl 3-([1,1'-biphenyl]-2-yl-2',3',4',5',6'- <i>d</i> <sub>5</sub> )-3-oxopropanoate ( <b>D<sub>5</sub>-1a</b> ) ..... | S10 |
| 2.14 Involved Substrates.....                                                                                                             | S12 |
| 3. Reaction optimization.....                                                                                                             | S13 |
| 4. General experimental procedure .....                                                                                                   | S15 |
| 5. Mechanism study.....                                                                                                                   | S16 |
| 5.1 Synthesis of <b>[I]-1a</b> .....                                                                                                      | S16 |
| 5.2 UV–vis absorption spectra .....                                                                                                       | S16 |
| 5.3 Light off/on experiment.....                                                                                                          | S17 |
| 5.4 Control experiments .....                                                                                                             | S17 |
| 5.5 <sup>1</sup> H spectra determination of H <sub>2</sub> O <sub>2</sub> .....                                                           | S18 |
| 5.6 Electron paramagnetic resonance (EPR) experiments .....                                                                               | S20 |
| 5.7 ESI-HRMS spectra .....                                                                                                                | S22 |
| 5.8 Competing kinetic isotope effect (KIE) experiments.....                                                                               | S23 |
| 5.9 Scale-up experiment .....                                                                                                             | S24 |
| 5.10 Supplementary data .....                                                                                                             | S24 |
| 6. Characterization Data for Compounds.....                                                                                               | S25 |
| 7. Copies of <sup>1</sup> H NMR, <sup>13</sup> C NMR and <sup>19</sup> F NMR .....                                                        | S40 |
| 8. References.....                                                                                                                        | S90 |

## 1. General information

All reagents were purchased from commercial suppliers and used without further purification. Flash chromatography was carried out with silica gel (200-300 mesh). Analytical TLC was performed with silica gel GF254 plates, and the products were visualized by UV detection.  $^1\text{H}$  NMR,  $^{13}\text{C}$  NMR and  $^{19}\text{F}$  NMR (400 MHz, 101 MHz and 377 MHz, respectively) spectra were measured in  $\text{CDCl}_3$ ,  $\text{DMSO}-d_6$ ,  $\text{Ethanol}-d_6$  recorded on Bruker Avance DPX 400 MHz spectrometer. All chemical shifts ( $\delta$ ) were reported in ppm and coupling constants ( $J$ ) in Hz. NMR Spectra recorded in  $\text{CDCl}_3$  were referenced to tetramethylsilane at 0 ppm for  $^1\text{H}$  or referenced to residual  $\text{CHCl}_3$  at 77.16 ppm for  $^{13}\text{C}$ . NMR Spectra recorded in  $\text{DMSO}-d_6$  were referenced to residual DMSO at 2.50 ppm for  $^1\text{H}$  or 39.52 ppm for  $^{13}\text{C}$ . NMR Spectra recorded in  $\text{Ethanol}-d_6$  were referenced to residual ethanol at 3.56 ppm for  $^1\text{H}$ . The following abbreviations are used: m (multiplet), s (singlet), d (doublet), t (triplet), q (quartet), dd (doublet of doublets), *etc.* The high resolution mass spectra (HRMS) were measured on a Bruker Daltonics APEX II 47e spectrometer by ESI. Substrates **1a–1z**,<sup>1</sup> **1aa**,<sup>2</sup> **1ab**,<sup>3</sup> **1ac**,<sup>4</sup> **1ad**,<sup>1</sup> **1ae**,<sup>1</sup> **1af**,<sup>4</sup> **1ag–1aj**<sup>5</sup> and compound **[1]-1a**<sup>6</sup> were prepared by the known methods.

## 2. Substrates preparation

### 2.1 Synthesis of 1a–1z

#### Scheme S1

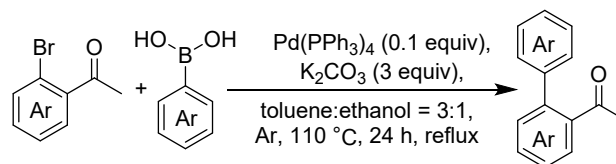

To a stirred solution of aryl bromide (4.0 mmol, 1.0 equiv) and aryl boronic acid (4.8 mmol, 1.2 equiv) in a toluene:ethanol = 3:1 (40 mL) mixture was added potassium carbonate (12.0 mmol, 3.0 equiv) and tetrakis(triphenylphosphine) palladium (0.4 mmol, 0.1 equiv). The resulting suspension was heated at 110 °C under an atmosphere of Ar for 24 h. The solvent was removed under reduced pressure and the crude residue was redissolved in water (100 mL) and extracted with EtOAc (3 × 30 mL). The combined organic layers were washed with water and brine. The filtrate was concentrated under reduced pressure and purified by column chromatography.

#### Scheme S2

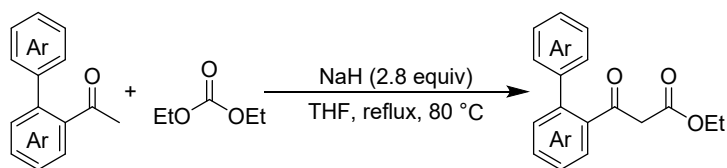

To a dried three-necked flask equipped with a dropping funnel, a condenser, and a magnetic stirrer was added NaH (60% in mineral oil, 11.2 mmol, 2.8 equiv), diethyl carbonate (11.2 mmol, 2.8 equiv), and dry THF (10 mL). The mixture was heated to 80 °C under an atmosphere of Ar. A solution of ketone (4.0 mmol, 1.0 equiv) in dry THF (50 mL) was added dropwise from the dropping funnel over 30–60 min. After the addition, the mixture was heated to reflux until the biaryl ketone is completely consumed (12 h). When the reaction was cooled to room temperature, glacial acetic acid was added dropwise and a heavy, pasty solid appeared. Ice-water was added until the solid was dissolved completely. The THF layer was separated, and the water layer was extracted with EtOAc (3 × 30 mL). The combined organic solution was washed with water and brine. After evaporation of the solvent, the mixture was distilled under reduced pressure. The crude residue was purified by column chromatography to furnish the desired compound **1a–1z**.

#### Ethyl 3-(3'-cyano-[1,1'-biphenyl]-2-yl)-3-oxopropanoate

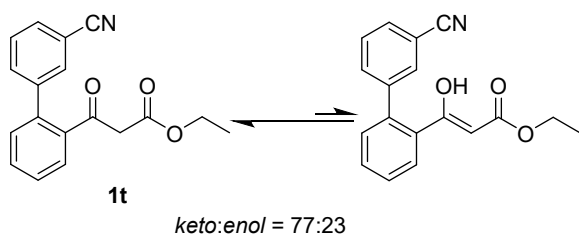

Pale yellow liquid (1.0 g, 83%, *keto:enol* = 77:23);  $R_f$  = 0.38 (petroleum ether/ethyl acetate 5:1);  $^1\text{H NMR}$  (400 MHz,  $\text{CDCl}_3$ )  $\delta$  12.24 (s, 0.3H, *enol*), 7.70–7.43 (m, 9.1H, *keto* + *enol*), 7.36–7.31 (m, 1.3H, *keto* + *enol*), 5.13 (s, 0.3H, *enol*), 4.20 (q,  $J$  = 6.8 Hz, 0.6H, *enol*), 4.13 (q,  $J$  = 6.8 Hz, 2H, *keto*), 3.58 (s, 2H, *keto*), 1.28 (t,  $J$  = 7.2 Hz, 0.9H, *enol*), 1.21 (t,  $J$  = 7.2 Hz, 3H, *keto*);  $^{13}\text{C NMR}$  (101 MHz,  $\text{CDCl}_3$ )  $\delta$  196.6, 173.3, 172.4, 166.9, 142.4, 141.9, 139.1, 138.6, 138.1, 133.8, 133.4, 133.2, 132.2, 132.0, 131.9, 131.3, 131.1, 130.9, 130.7, 130.6, 129.4, 129.4, 129.1, 128.9, 128.5, 128.3, 118.8, 118.6, 112.9, 112.5, 93.0, 61.5, 60.5, 48.5, 14.3, 14.1; **ESI-HRMS**:  $m/z$  Calcd for  $\text{C}_{18}\text{H}_{16}\text{NO}_3^+$   $[\text{M}+\text{H}]^+$ : 294.1125, found 294.1115.

**Ethyl 3-(3',5'-dichloro-[1,1'-biphenyl]-2-yl)-3-oxopropanoate**

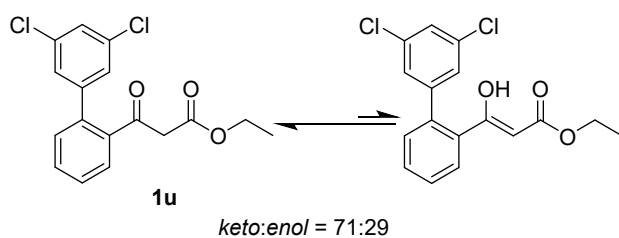

White solid (1.2 g, 90%, *keto:enol* = 71:29);  $R_f$  = 0.47 (petroleum ether/ethyl acetate 10:1);  $^1\text{H NMR}$  (400 MHz,  $\text{CDCl}_3$ )  $\delta$  12.26 (s, 0.4H, *enol*), 7.65 (d,  $J$  = 7.6 Hz, 1H, *keto*), 7.58–7.54 (m, 1.4H, *keto* + *enol*), 7.50–7.29 (m, 4.6H, *keto* + *enol*), 7.25 (d,  $J$  = 8.0 Hz, 2.8H, *keto* + *enol*), 5.14 (s, 0.4H, *enol*), 4.21 (q,  $J$  = 7.2 Hz, 0.8H, *enol*), 4.13 (q,  $J$  = 6.8 Hz, 2H, *keto*), 3.55 (s, 2H, *keto*), 1.29 (t,  $J$  = 7.2 Hz, 1.2H, *enol*), 1.21 (t,  $J$  = 6.8 Hz, 3H, *keto*);  $^{13}\text{C NMR}$  (101 MHz,  $\text{CDCl}_3$ )  $\delta$  196.9, 173.2, 172.5, 166.9, 144.1, 143.4, 138.5, 138.4, 138.3, 135.3, 134.7, 133.8, 131.8, 130.8, 130.7, 130.5, 129.3, 128.9, 128.6, 128.4, 128.0, 127.4, 127.2, 93.0, 61.6, 60.5, 48.7, 14.3, 14.1; **ESI-HRMS**:  $m/z$  Calcd for  $\text{C}_{17}\text{H}_{15}\text{Cl}_2\text{O}_3^+$   $[\text{M}+\text{H}]^+$ : 337.0393, found 337.0381.

## 2.2 Synthesis of methyl 3-([1,1'-biphenyl]-2-yl)-3-oxopropanoate (**1aa**)

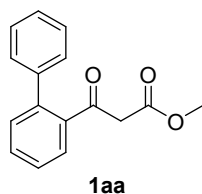

To a dried three-necked flask equipped with a dropping funnel, a condenser, and a magnetic stirrer was added NaH (60% in mineral oil, 11.2 mmol, 2.8 equiv), dimethyl carbonate (11.2 mmol, 2.8 equiv), and dry THF (10 mL). The mixture was heated to 80 °C under an atmosphere of Ar. A solution of 1-([1,1'-biphenyl]-2-yl)ethan-1-one (4.0 mmol, 1.0 equiv) in dry THF (50 mL) was added dropwise from the dropping funnel over 30–60 min. After the addition, the mixture was heated to reflux until the 1-([1,1'-biphenyl]-2-yl)ethan-1-one is completely consumed (12 h). When the reaction was cooled to room temperature, glacial acetic acid was added dropwise and a heavy, pasty solid appeared. Ice-water was added until the solid was dissolved completely. The THF layer was separated, and the water layer was extracted with EtOAc (3 × 30 mL). The combined organic solution was washed with water and brine. After evaporation of the solvent, the mixture was distilled under reduced pressure. The crude residue was purified by column chromatography to furnish the compound **1aa** as a white solid.

## 2.3 Synthesis of benzyl 3-([1,1'-biphenyl]-2-yl)-3-oxopropanoate (**1ab**)

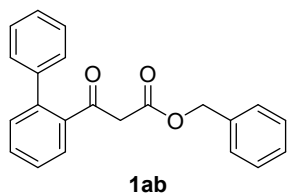

A mixture of benzyl alcohol (4.0 mmol, 1.0 equiv), ethyl 3-([1,1'-biphenyl]-2-yl)-3-oxopropanoate (4.0 mmol, 1.0 equiv), DMAP (4.0 mmol, 1.0 equiv) was stirred with oven-dried 4 Å molecular sieves (20 g) in dry toluene (30 mL) at 100–105 °C for 48 h. The reaction mixture was cooled to room temperature, and filtered to remove the molecular sieves. The solvents were removed under reduced pressure, and EtOAc (60 mL) and water (60 mL) were added to the residue. The layers were separated, and filtered, and concentrated. The crude product was purified by column chromatography to furnish the compound **1ab** as a pale yellow liquid.

#### 2.4 Synthesis of 1-([1,1'-biphenyl]-2-yl)-3-phenylpropane-1,3-dione (**1ac**)

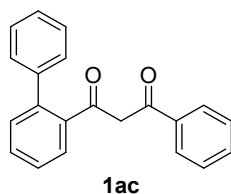

To a stirred solution of 1-([1,1'-biphenyl]-2-yl)ethan-1-one (4.0 mmol, 1.0 equiv) in toluene (30 mL) pre-cooled at 0 °C, LiHMDS (1 M in toluene, 6.0 mmol, 1.5 equiv) was dropwise added over 10 min. After stirring at 0 °C for 10 min, benzoyl chloride (99%, 8.0 mmol, 2.0 equiv) was added in one portion. The reaction mixture was then allowed to stir at room temperature for an additional 2 min, quenched by glacial acetic acid and diluted with ethyl acetate. The solution was washed with water and brine, and concentrated under reduced pressure. The crude residue was purified by column chromatography to furnish the compound **1ac** as a pale yellow solid.

#### 2.5 Synthesis of 3-([1,1'-biphenyl]-2-yl)-3-oxo-N-phenylpropanamide (**1ad**)

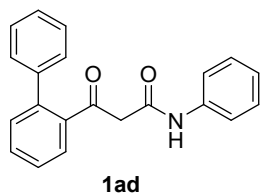

To ethyl 3-([1,1'-biphenyl]-2-yl)-3-oxopropanoate (4.0mmol, 1.0 equiv) in a round bottom flask, aniline (4.0mmol, 1.0 equiv) was added. To this reaction mixture, xylene (10 mL) was added, and the whole of the reaction mixture was heated at 165 °C under an atmosphere of Ar on an oil bath for 24 h. The reaction mixture was removed from heating, allowed to attain ambient temperature, distilled under reduced pressure. And the resultant residue was purified by column chromatography to furnish compound **1ad** as a pale yellow liquid.

#### 2.6 Synthesis of 3-([1,1'-biphenyl]-2-yl)-3-oxopropanenitrile (**1ae**)

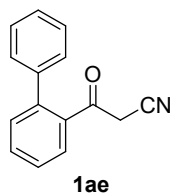

To a suspension of NaH (2.0 equiv.) in dry THF, under Ar was added acetonitrile (2 mL), followed by methyl [1,1'-biphenyl]-2-carboxylate (1.0 equiv). The reaction mixture was heated to 80 °C for 24 h. Then

cooled to 0°C, quenched with water. The THF layer was separated, and the water layer was extracted with EtOAc. The combined organic solution was washed with water and brine. After evaporation of the solvent, the mixture was distilled under reduced pressure or subjected to chromatography to give **1ae** as a yellow solid.

## 2.7 Synthesis of 1-([1,1'-biphenyl]-2-yl)-2-(methylsulfonyl)ethan-1-one (**1af**)

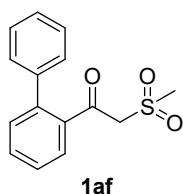

Under Ar protection, *n*-BuLi (2.76 mL, 2.0 M in cyclohexane, 5.52 mmol) was dropwise added to a stirred solution of dimethyl sulfone (314.8 mg, 99%, 3.31 mmol) in THF (16 mL) at 0 °C. The resultant white cloudy solution was continued to stir at 0 °C for 40 min, followed by slowly adding with a solution of ethyl biphenyl-2-carboxylate (624.3 mg, 2.76 mmol) in THF (11.5 mL) over 5 min. The reaction mixture was then allowed to stir at rt for 36 hours, quenched by H<sub>2</sub>O (15 mL), and diluted with ethyl acetate (350 mL). The organic layer was separated and washed with saturated aqueous NH<sub>4</sub>Cl solution (50 mL x 2), water (50 mL) and brine (50 mL). After concentration, the crude mixture was subjected to chromatography to provide **1af** as a white solid.

## 2.8 Synthesis of ethyl 3-oxo-3-(2-(pyridin-2-yl)phenyl)propanoate (**1ag**)

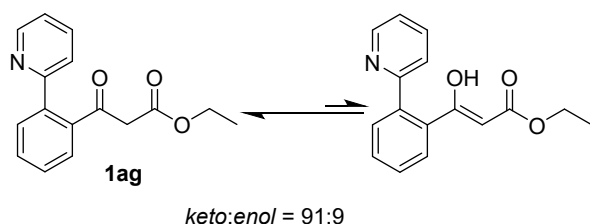

In an argon-filled glove box, to a 100 mL Schlenk tube was charged sequentially Pd(OAc)<sub>2</sub> (0.08 mmol), PtBu<sub>3</sub>·HBF<sub>4</sub> (0.12 mmol), 2-bromopyridine (4 mmol), (2-acetylphenyl)boronic acid (4.8 mmol), and 35 mL of dioxane/H<sub>2</sub>O (4:1). The mixture was stirred at RT for 15 min, and then a solution of NaOH (6.5 mmol) in 6 mL of degassed H<sub>2</sub>O was added to initiate the Suzuki reaction. The Schlenk tube was capped tightly and the reaction mixture was stirred vigorously at 80 °C for 12 h. At the end of the reaction, the organic phase was separated and the aqueous phase was further extracted with Et<sub>2</sub>O. The combined organic extracts were concentrated on a rotary evaporator. The resulting residue was purified by silica gel flash chromatography to obtain the desired coupling product 1-(2-(pyridin-2-yl)phenyl)ethan-1-one. The next operation is the same as



Scheme S2 to provide **1ag**. Yellow liquid (0.92 g, 85%, *keto:enol* = 91:9);  $R_f$  = 0.39 (petroleum ether/ethyl acetate 1:2);  $^1\text{H NMR}$  (400 MHz,  $\text{CDCl}_3$ )  $\delta$  12.22 (s, 0.1H, *enol*), 8.63 (s, 1.1H, *keto* + *enol*), 7.77 (t,  $J$  = 7.6 Hz, 1.1H, *keto* + *enol*), 7.69 (d,  $J$  = 7.2 Hz, 2.2H, *keto* + *enol*), 7.60–7.45 (m, 3.3H, *keto* + *enol*), 7.28–7.25 (m, 1.1H, *keto* + *enol*), 5.21 (s, 0.1H, *enol*), 4.18 (q,  $J$  = 6.4 Hz, 0.2H, *enol*), 4.11 (q,  $J$  = 7.2 Hz, 2H, *keto*), 3.56 (s, 2H, *keto*), 1.27 (t,  $J$  = 6.8 Hz, 0.3H, *enol*), 1.20 (t,  $J$  = 6.8 Hz, 3H, *keto*);  $^{13}\text{C NMR}$  (101 MHz,  $\text{CDCl}_3$ )  $\delta$  198.3, 174.3, 172.6, 167.4, 158.6, 156.1, 149.4, 149.1, 140.6, 139.9, 137.9, 137.1, 136.1, 133.9, 130.6, 130.5, 130.3, 129.1, 128.9, 128.4, 128.3, 128.0, 123.6, 122.6, 122.1, 121.9, 92.1, 61.1, 60.2, 49.4, 14.2, 14.1; **ESI-HRMS**:  $m/z$  Calcd for  $\text{C}_{16}\text{H}_{16}\text{NO}_3^+$   $[\text{M}+\text{H}]^+$ : 270.1125, found 270.1127.

### 2.9 Synthesis of ethyl 3-(2-(1-methyl-1H-indol-3-yl)phenyl)-3-oxopropanoate (**1ah**)

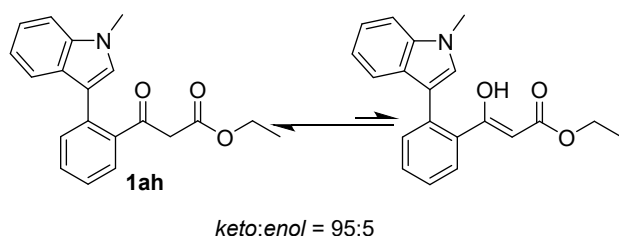

In an argon-filled glove box, to a 100 mL Schlenk tube was charged sequentially  $\text{Pd}(\text{OAc})_2$  (0.08 mmol),  $\text{P}t\text{Bu}_3\cdot\text{HBF}_4$  (0.12 mmol), 3-bromo-1-methyl-1*H*-indole (4 mmol), (2-acetylphenyl)boronic acid (4.8 mmol), and 35 mL of dioxane. The mixture was prestirred at RT for 15 min, and then a solution of NaOH (6.5 mmol) in 6 mL of degassed  $\text{H}_2\text{O}$  was added to initiate the Suzuki reaction. The Schlenk tube was capped tightly and the reaction mixture was stirred vigorously at 80 °C for 12 h. At the end of the reaction, the organic phase was separated and the aqueous phase was further extracted with  $\text{Et}_2\text{O}$ . The combined organic extracts were concentrated on a rotary evaporator. The resulting residue was purified by silica gel flash chromatography to obtain the desired coupling product 1-(2-(1-methyl-1*H*-indol-3-yl)phenyl)ethan-1-one. The next operation is the same as Scheme S2 to provide **1ah**. Yellow liquid (770 mg, 60%, *keto:enol* = 95:5);  $R_f$  = 0.27 (petroleum ether/ethyl acetate 10:1);  $^1\text{H NMR}$  (400 MHz,  $\text{CDCl}_3$ )  $\delta$  12.35 (s, 0.05H, *enol*), 7.70 (d,  $J$  = 8.0 Hz, 1.05H, *keto* + *enol*) 7.64–7.52 (m, 3.15H, *keto* + *enol*), 7.40–7.29 (m, 3.15H, *keto* + *enol*), 7.24–7.14 (m, 1.05H, *keto* + *enol*), 7.04 (s, 1.05H, *keto* + *enol*), 5.14 (s, 0.05H, *enol*), 4.13 (q,  $J$  = 7.2 Hz, 0.1H, *enol*), 4.01 (q,  $J$  = 6.8 Hz, 2H, *keto*), 3.83 (s, 3H, *keto*), 3.81 (s, 0.15H, *enol*), 3.32 (s, 2H, *keto*), 1.21 (t,  $J$  = 7.2 Hz, 0.15H, *enol*), 1.13 (t,  $J$  = 6.8 Hz, 3H, *keto*);  $^{13}\text{C NMR}$  (101 MHz,  $\text{CDCl}_3$ )  $\delta$  200.3, 175.0, 172.9, 167.4, 140.1, 137.3, 137.0, 134.2,

133.9, 133.2, 131.5, 131.2, 130.6, 130.1, 129.3, 128.6, 127.8, 127.1, 126.6, 126.5, 126.3, 122.7, 121.9, 120.5, 119.8, 119.7, 115.0, 114.0, 109.8, 109.4, 92.2, 61.1, 60.1, 48.4, 33.1, 14.3, 14.1; **ESI-HRMS**:  $m/z$  Calcd for  $C_{20}H_{20}NO_3^+$   $[M+H]^+$ : 332.1438, found 332.1431.

## 2.10 Synthesis of ethyl 3-(2-(furan-2-yl)phenyl)-3-oxopropanoate (1ai)

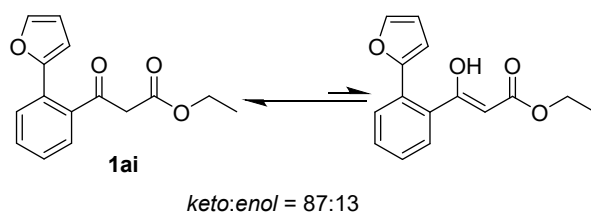

In an argon-filled glove box, to a 100 mL Schlenk tube was charged sequentially  $Pd(OAc)_2$  (0.08 mmol),  $PfBu_3 \cdot HBF_4$  (0.12 mmol), 2-bromofuran (4 mmol), (2-acetylphenyl)boronic acid (4.8 mmol), and 35 mL of  $nBuOH/H_2O$  (4:1). The mixture was prestirred at RT for 15 min, and then a solution of NaOH (6.5 mmol) in 6 mL of degassed  $H_2O$  was added to initiate the Suzuki reaction. The Schlenk tube was capped tightly and the reaction mixture was stirred vigorously at r.t. for 12 h. At the end of the reaction, the organic phase was separated and the aqueous phase was further extracted with  $Et_2O$ . The combined organic extracts were concentrated on a rotary evaporator. The resulting residue was purified by silica gel flash chromatography to obtain the desired coupling product 1-(2-(furan-2-yl)phenyl)ethan-1-one. The next operation is the same as Scheme S2 to provide **1ai**. Yellow liquid (720 mg, 70%, *keto:enol* = 87:13);  $R_f$  = 0.41 (petroleum ether/ethyl acetate 10:1);  **$^1H$  NMR** (400 MHz,  $CDCl_3$ )  $\delta$  12.36 (s, 0.15H, *enol*), 7.67 (d,  $J$  = 7.6 Hz, 0.15H, *enol*), 7.60 (d,  $J$  = 7.6 Hz, 1H, *keto*), 7.53–7.46 (m, 3.3H, *keto* + *enol*), 7.40–7.26 (m, 1.3H, *keto* + *enol*), 6.63–6.60 (m, 1.15H, *keto* + *enol*), 6.52–6.46 (m, 1.15H, *keto* + *enol*), 5.23 (s, 0.15H, *enol*), 4.26 (q,  $J$  = 7.2 Hz, 0.3H, *enol*), 4.13 (q,  $J$  = 7.2 Hz, 2H, *keto*), 3.55 (s, 2H, *keto*), 1.32 (t,  $J$  = 7.2 Hz, 0.45H, *enol*), 1.22 (t,  $J$  = 7.2 Hz, 3H, *keto*);  **$^{13}C$  NMR** (101 MHz,  $CDCl_3$ )  $\delta$  198.9, 174.8, 172.9, 167.2, 152.1, 151.8, 143.6, 142.6, 138.0, 132.4, 130.9, 130.2, 129.5, 129.5, 128.4, 128.1, 128.1, 128.0, 127.7, 127.5, 112.2, 111.7, 109.0, 108.7, 92.0, 61.4, 60.4, 48.7, 14.4, 14.1; **ESI-HRMS**:  $m/z$  Calcd for  $C_{15}H_{15}O_4^+$   $[M+H]^+$ : 259.0965, found 259.0968.

### 2.11 Synthesis of ethyl 3-oxo-3-(2-(thiophen-2-yl)phenyl)propanoate (**1aj**)

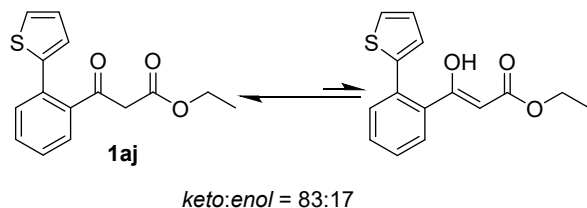

In an argon-filled glove box, to a 100 mL Schlenk tube was charged sequentially Pd(OAc)<sub>2</sub> (0.08 mmol), PtBu<sub>3</sub>·HBF<sub>4</sub> (0.12 mmol), 2-bromothiophene (4 mmol), (2-acetylphenyl)boronic acid (4.8 mmol), and 35 mL of *n*BuOH/H<sub>2</sub>O (4:1). The mixture was prestirred at RT for 15 min, and then a solution of NaOH (6.5 mmol) in 6 mL of degassed H<sub>2</sub>O was added to initiate the Suzuki reaction. The Schlenk tube was capped tightly and the reaction mixture was stirred vigorously at r.t. for 12 h. At the end of the reaction, the organic phase was separated and the aqueous phase was further extracted with Et<sub>2</sub>O. The combined organic extracts were concentrated on a rotary evaporator. The resulting residue was purified by silica gel flash chromatography to obtain the desired coupling product 1-(2-(thiophen-2-yl)phenyl)ethan-1-one. The next operation is the same as Scheme S2 to provide **1aj**. Yellow liquid (820 mg, 75%, *keto:enol* = 83:17); *R<sub>f</sub>* = 0.41 (petroleum ether/ethyl acetate 10:1); <sup>1</sup>H NMR (400 MHz, CDCl<sub>3</sub>) δ 12.31 (s, 0.2H, *enol*), 7.54–7.49 (m, 3.6H, *keto* + *enol*), 7.44–7.32 (m, 2.4H, *keto* + *enol*), 7.12–7.09 (m, 1.2H, *keto* + *enol*), 7.05–7.02 (m, 1.2H, *keto* + *enol*), 5.20 (s, 0.2H, *enol*), 4.21 (q, *J* = 6.8 Hz, 0.4H, *enol*), 4.08 (q, *J* = 6.8 Hz, 2H, *keto*), 3.41 (s, 2H, *keto*), 1.29 (t, *J* = 6.8 Hz, 0.6H, *enol*), 1.18 (t, *J* = 7.2 Hz, 3H, *keto*); <sup>13</sup>C NMR (101 MHz, CDCl<sub>3</sub>) δ 199.2, 174.1, 172.7, 167.1, 141.9, 140.9, 140.0, 134.2, 133.4, 132.5, 131.2, 131.1, 130.7, 130.1, 129.4, 128.5, 128.3, 128.2, 127.8, 127.5, 127.3, 126.6, 126.0, 92.9, 61.3, 60.4, 48.6, 14.3, 14.1; ESI-HRMS: *m/z* Calcd for C<sub>15</sub>H<sub>15</sub>O<sub>3</sub>S<sup>+</sup> [M+H]<sup>+</sup>: 275.0736, found 275.0739.

### 2.12 Synthesis of ethyl 3-([1,1'-biphenyl]-2-yl)-2-iodo-3-oxopropanoate ([**I**]-1a)

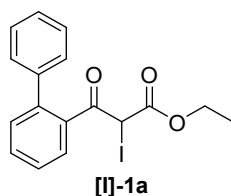

To the *i*-PrOH solution of ethyl 3-([1,1'-biphenyl]-2-yl)-3-oxopropanoate (**1a**, 1.0 mmol), *N*-halosuccinamide (NIS) (1.05 mmol) was added, and the resultant mixture was stirred at room temperature for 3 h in dark. After completion of the reaction as indicated by TLC, the reaction mixture was washed with NH<sub>4</sub>Cl

solution. The product was extracted with ethyl acetate, dried over sodium sulphate, and purified by column chromatography to afford [I]-**1a**. Yellow liquid; yield 335 mg, 85%;  $R_f = 0.36$  (petroleum ether/ethyl acetate 10:1);  $^1\text{H NMR}$  (400 MHz,  $\text{CDCl}_3$ )  $\delta$  7.61 (d,  $J = 7.2$  Hz, 1H), 7.55 (t,  $J = 7.2$  Hz, 1H), 7.44–7.35 (m, 7H), 4.91 (s, 1H), 4.10–4.06 (m, 2H), 1.17 (t,  $J = 7.2$  Hz, 3H);  $^{13}\text{C NMR}$  (101 MHz,  $\text{CDCl}_3$ )  $\delta$  195.8, 166.2, 140.3, 139.6, 136.4, 131.7, 130.4, 130.3, 129.3, 128.8, 128.5, 127.6, 62.8, 26.5, 13.8; **ESI-HRMS**:  $m/z$  Calcd for  $\text{C}_{17}\text{H}_{16}\text{IO}_3^+$   $[\text{M}+\text{H}]^+$ : 395.0139, found 395.0126.

### 2.13 Synthesis of ethyl 3-([1,1'-biphenyl]-2-yl-2',3',4',5',6'- $d_5$ )-3-oxopropanoate (**D<sub>5</sub>-1a**)

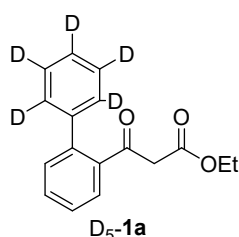

To a stirred solution of 1-(2-bromophenyl)ethan-1-one (4.0 mmol, 1.0 equiv) and (phenyl- $d_5$ )boronic acid (4.8 mmol, 1.2 equiv) in a toluene:ethanol = 3:1 (40 mL) mixture was added potassium carbonate (12.0 mmol, 3.0 equiv) and tetrakis(triphenylphosphine) palladium (0.4 mmol, 0.1 equiv). The resulting suspension was heated at 110 °C under an atmosphere of Ar for 24 h. The solvent was removed under reduced pressure and the crude residue was redissolved in water (100 mL) and extracted with EtOAc (3 × 30 mL). The combined organic layers were washed with water and brine. The filtrate was concentrated under reduced pressure and purified by column chromatography.

To a dried three-necked flask equipped with a dropping funnel, a condenser, and a magnetic stirrer was added NaH (60% in mineral oil, 11.2 mmol, 2.8 equiv), diethyl carbonate (11.2 mmol, 2.8 equiv), and dry THF (10 mL). The mixture was heated to 80 °C under an atmosphere of Ar. A solution of 1-([1,1'-biphenyl]-2-yl-2',3',4',5',6'- $d_5$ )ethan-1-one (4.0 mmol, 1.0 equiv) in dry THF (50 mL) was added dropwise from the dropping funnel over 30–60 min. After the addition, the mixture was heated to reflux until the 1-([1,1'-biphenyl]-2-yl-2',3',4',5',6'- $d_5$ )ethan-1-one is completely consumed (12 h). When the reaction was cooled to room temperature, glacial acetic acid was added dropwise and a heavy, pasty solid appeared. Ice-water was added until the solid was dissolved completely. The THF layer was separated, and the water layer was extracted with EtOAc (3 × 30 mL). The combined organic solution was washed with water and brine. After evaporation of the solvent, the mixture was distilled under reduced pressure. The crude residue was purified by column

chromatography to furnish the compound D<sub>5</sub>-**1a** 0.9 g, 82% yield. Pale yellow liquid, (*keto:enol* = 87:13); *R<sub>f</sub>* = 0.47 (petroleum ether/ethyl acetate 10:1); **<sup>1</sup>H NMR** (400 MHz, CDCl<sub>3</sub>) δ 12.26 (s, 0.15H, *enol*), 7.61–7.58 (m, 1.15H, *keto* + *enol*), 7.53 (t, *J* = 7.6 Hz, 1H, *keto*), 7.48–7.36 (m, 2.45H, *keto* + *enol*), 5.06 (s, 0.15H, *enol*), 4.16 (q, *J* = 7.2 Hz, 0.3H, *enol*), 4.05 (q, *J* = 7.2 Hz, 2H, *keto*), 3.27 (s, 2H, *keto*), 1.25 (t, *J* = 7.2 Hz, 0.45H, *enol*), 1.15 (t, *J* = 6.8 Hz, 3H, *keto*); **<sup>13</sup>C NMR** (101 MHz, CDCl<sub>3</sub>) δ 199.0, 174.2, 172.7, 167.1, 141.0, 140.8, 140.6, 140.0, 139.5, 133.8, 131.4, 130.9, 130.4, 130.2, 129.1, 128.9, 128.7, 128.6, 128.5, 128.4, 128.2, 128.0, 127.7, 127.6, 127.3, 92.8, 61.2, 60.3, 48.8, 14.3, 14.1; **ESI-HRMS**: *m/z* Calcd for C<sub>17</sub>H<sub>12</sub>D<sub>5</sub>O<sub>3</sub><sup>+</sup> [M+H]<sup>+</sup>: 274.1486, found 274.1476.

## 2.14 Involved Substrates

Table S1. Involved Substrates

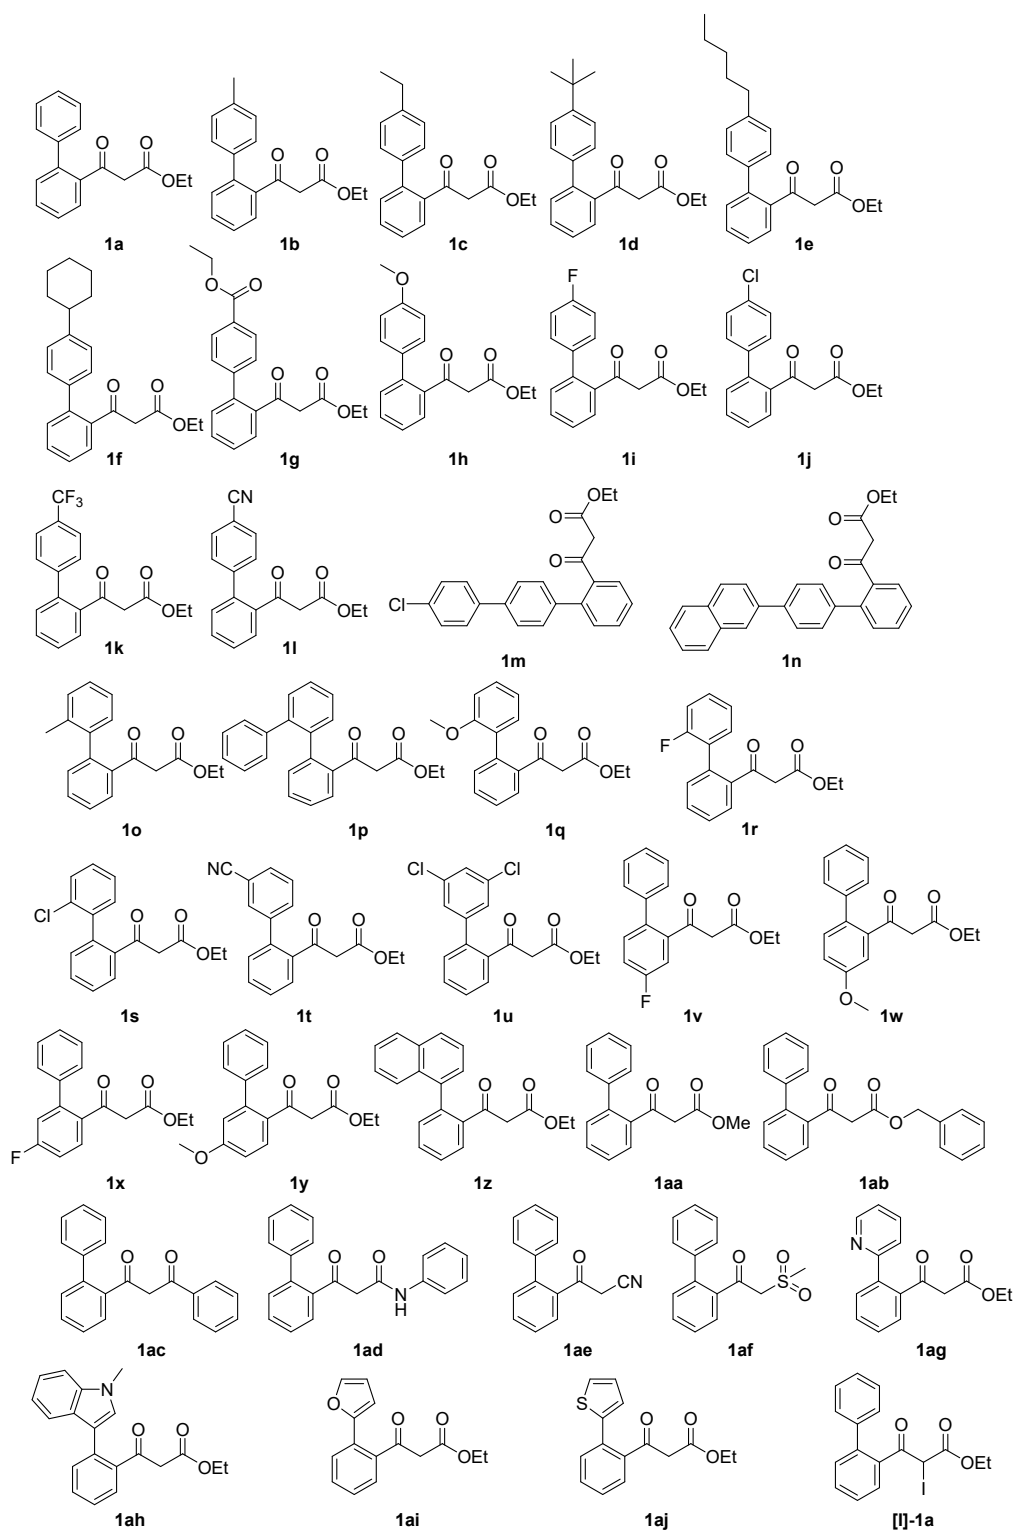

### 3. Reaction optimization

Table S2. Optimization of the Reaction Conditions<sup>a</sup>

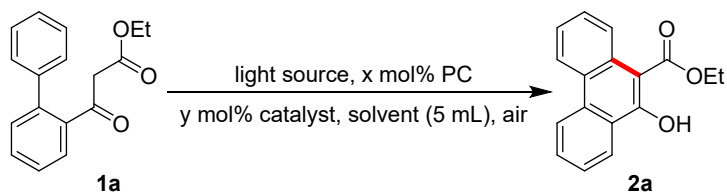

| Entry           | PC (x mol%)              | Catalyst (y mol%) | Solvent (mL)       | light source (nm)   | Time (h)  | Yield (%) <sup>b</sup> |
|-----------------|--------------------------|-------------------|--------------------|---------------------|-----------|------------------------|
| 1               | —                        | NIS (100)         | i-PrOH             | sunlight            | 7         | 53                     |
| 2               | —                        | NIS (50)          | i-PrOH             | sunlight            | 7         | 57                     |
| 3               | —                        | NIS (20)          | i-PrOH             | sunlight            | 7         | 67                     |
| 4               | —                        | NIS (10)          | i-PrOH             | sunlight            | 7         | 79                     |
| <b>5</b>        | <b>—</b>                 | <b>NIS (5)</b>    | <b>i-PrOH</b>      | <b>sunlight</b>     | <b>7</b>  | <b>87</b>              |
| 6               | —                        | NIS (1)           | i-PrOH             | sunlight            | 7         | trace                  |
| 7               | —                        | I <sub>2</sub>    | i-PrOH             | sunlight            | 7         | 80                     |
| 8               | —                        | HI                | i-PrOH             | sunlight            | 7         | 65                     |
| 9               | —                        | TBAI              | i-PrOH             | sunlight            | 7         | 12                     |
| 10              | —                        | KI                | i-PrOH             | sunlight            | 7         | 20                     |
| 11              | —                        | NIS (5)           | DMSO               | sunlight            | 24        | 79                     |
| 12              | —                        | NIS (5)           | CH <sub>3</sub> CN | sunlight            | 24        | 18                     |
| 13              | —                        | NIS (5)           | MeOH               | sunlight            | 24        | trace                  |
| 14              | —                        | NIS (5)           | Toluene            | sunlight            | 24        | 18                     |
| 15              | —                        | NIS (5)           | DCM                | sunlight            | 24        | 15                     |
| 16              | —                        | NIS (5)           | THF                | sunlight            | 16        | 82                     |
| 17              | —                        | NIS (5)           | EA                 | sunlight            | 16        | 65                     |
| 18              | —                        | NIS (5)           | Acetone            | sunlight            | 24        | 60                     |
| 19              | —                        | NIS (5)           | EtOH               | sunlight            | 16        | 77                     |
| 20              | —                        | NIS (5)           | i-PrOH             | 3W blue LEDs (445)  | 7         | 90                     |
| 21              | —                        | NIS (5)           | i-PrOH             | 3W green LEDs (525) | 24        | NR                     |
| <b>22</b>       | <b>—</b>                 | <b>NIS (10)</b>   | <b>THF</b>         | <b>sunlight</b>     | <b>12</b> | <b>93</b>              |
| 23              | —                        | NIS (5)           | i-PrOH             | dark                | 7         | NR                     |
| 24 <sup>c</sup> | —                        | NIS (5)           | i-PrOH             | dark                | 7         | NR                     |
| 25              | —                        | —                 | i-PrOH             | sunlight            | 7         | NR                     |
| 26              | —                        | NIS (5)           | i-PrOH             | sunlight            | 7         | NR                     |
| 27              | —                        | NBS (5)           | i-PrOH             | sunlight            | 7         | 15                     |
| 28              | —                        | NCS (5)           | i-PrOH             | sunlight            | 7         | 10                     |
| 29              | EY (3)                   | —                 | CH <sub>3</sub> CN | 3W green LEDs (525) | 8         | trace                  |
| 30              | EY (3)                   | —                 | DMF                | 3W green LEDs (525) | 8         | trace                  |
| 31              | EY (3)                   | —                 | DMF                | 3W green LEDs (525) | 24        | trace                  |
| 32              | EY (3)                   | —                 | DMF                | 3W green LEDs (525) | 8         | 36                     |
| 33              | EY (3)                   | —                 | DMSO               | 3W green LEDs (525) | 8         | trace                  |
| 34              | Ir(ppy) <sub>3</sub> (3) | —                 | CH <sub>3</sub> CN | 3W blue LEDs (465)  | 24        | NR                     |

|    |                          |   |                    |                    |    |       |
|----|--------------------------|---|--------------------|--------------------|----|-------|
| 35 | Ir(ppy) <sub>3</sub> (3) | – | DMF                | 3W blue LEDs (465) | 24 | NR    |
| 36 | Ir(ppy) <sub>3</sub> (3) | – | DMSO               | 3W blue LEDs (465) | 24 | trace |
| 37 | Ru(bpy) <sub>3</sub> (3) | – | CH <sub>3</sub> CN | 3W blue LEDs (465) | 24 | trace |
| 38 | Ru(bpy) <sub>3</sub> (3) | – | DMF                | 3W blue LEDs (465) | 24 | trace |
| 39 | Ru(bpy) <sub>3</sub> (3) | – | DMSO               | 3W blue LEDs (465) | 24 | NR    |

<sup>a</sup>Reaction conditions: corresponding **1a**, photocatalyst (x mol%), cocatalyst (y mol%) in 5 mL solvent in air atmosphere, irradiation with light source, at rt. <sup>b</sup>Isolated yields. <sup>c</sup>50 °C.



#### 4. General experimental procedure

**Method A:** A 10 mL Pyrex tube was charged with substrate **1a–1n**, **1t–1ac** (0.1 mmol, 1 equiv) and NIS (0.005 mmol, 1.12 mg, 0.05 equiv) in i-PrOH (5 mL). The sample was then irradiated by sunlight for 7 h. Upon completion of the reaction, the solvent was then removed under vacuum. The residue was purified with chromatography column on silica gel using mixtures of petroleum ether and ethyl acetate to give the corresponding products. The identity and purity of the product **2a–2n**, **2t–2ac** was confirmed by <sup>1</sup>H NMR, <sup>13</sup>C NMR or <sup>19</sup>F NMR spectroscopic analysis. **Method B:** A 10 mL Pyrex tube was charged with substrate **1o–1s** (0.1 mmol, 1 equiv) and NIS (0.01 mmol, 2.24 mg, 0.1 equiv) in THF (5 mL). The sample was then irradiated by sunlight for 12 h. Upon completion of the reaction, the solvent was then removed under vacuum. The residue was purified with chromatography column on silica gel using mixtures of petroleum ether and ethyl acetate to give the corresponding products. The identity and purity of the product **2o–2s** was confirmed by <sup>1</sup>H NMR, <sup>13</sup>C NMR or <sup>19</sup>F NMR spectroscopic analysis.

The irradiation was maintained from 9:00 am till 16:00 pm (Longitude: 116.338229, Latitude: 39.994285). The ambient temperature and the light intensity are reported later. Other procedures are the same as the general method described above.

## 5. Mechanism study

### 5.1 Synthesis of [I]-1a

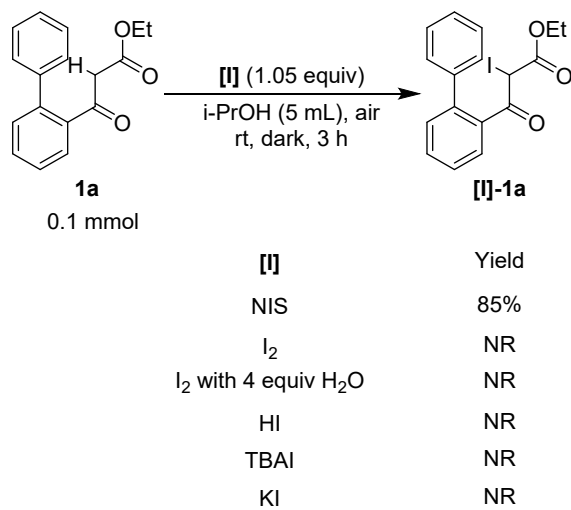

Fig. S1 Synthesis of [I]-1a.

### 5.2 UV-vis absorption spectra

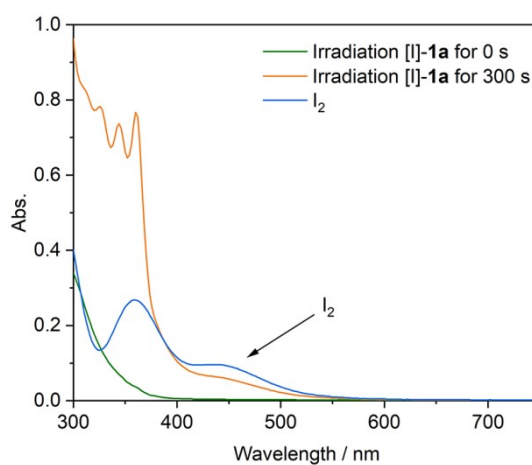

Fig. S2 UV-vis absorption spectra: i-PrOH solution of [I]-1a (0.1 mM) (labeled by green line); i-PrOH solution of [I]-1a (0.1 mM) irradiation with sunlight for 300 s (labeled by yellow line); i-PrOH solution of I<sub>2</sub> (0.1 mM) (labeled by blue line).

### 5.3 Light off/on experiment

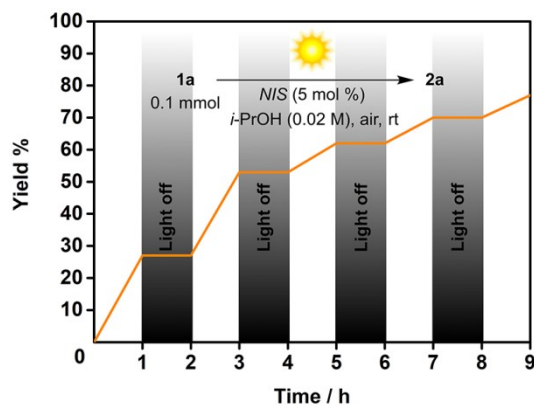

Fig. S3 Light off/on experiment.

### 5.4 Control experiments

#### a) Elucidation of role of I<sup>•</sup>

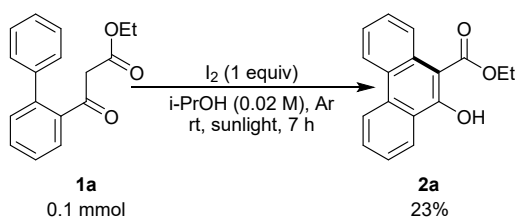

#### b) Elucidation of role of [I]-1a and O<sub>2</sub>

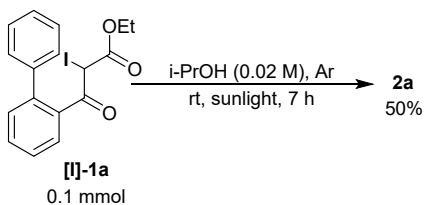

#### c) Elucidation of role of <sup>1</sup>O<sub>2</sub>

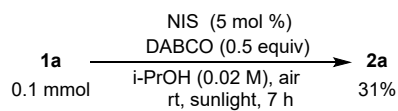

#### d) Elucidation of role of H<sub>2</sub>O<sub>2</sub>

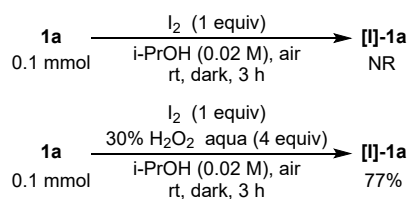

Fig. S4 Control experiments.

### 5.5 $^1\text{H}$ spectra determination of $\text{H}_2\text{O}_2$

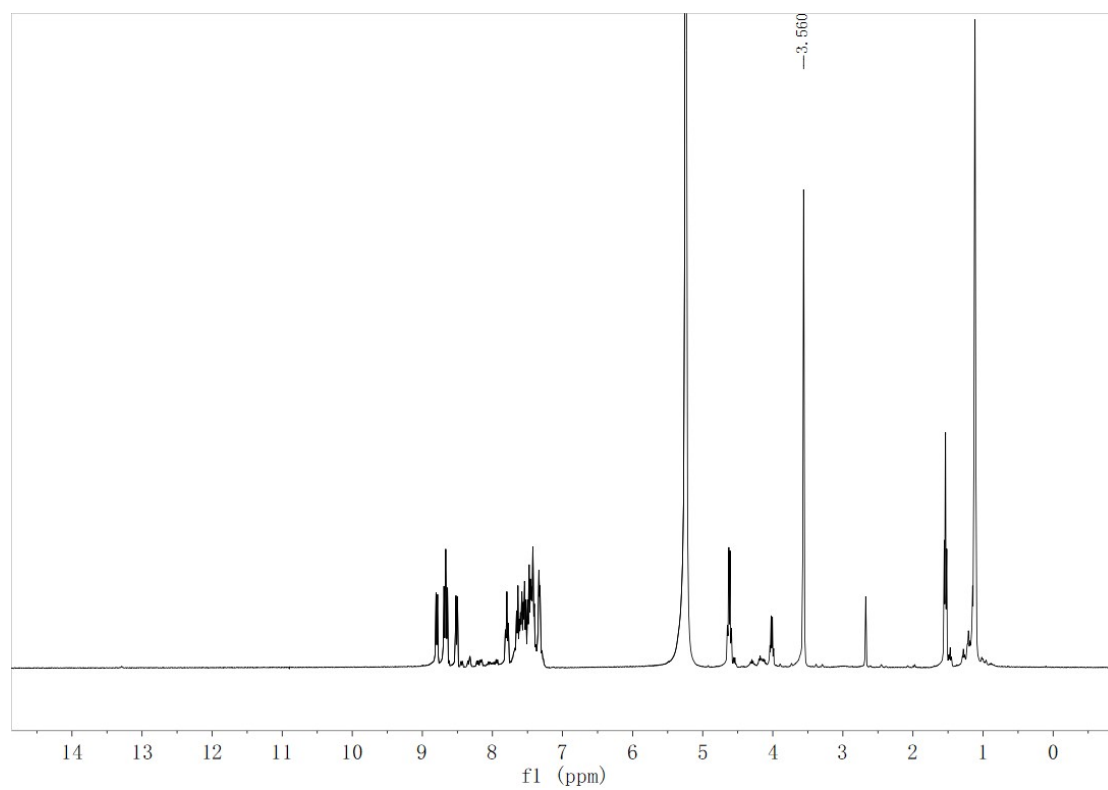

**Fig. S5**  $^1\text{H}$  spectra of the reaction mixture irradiation with sunlight for 5 h (Ethanol- $d_6$ , 400 MHz). No  $\text{H}_2\text{O}_2$  was detected.

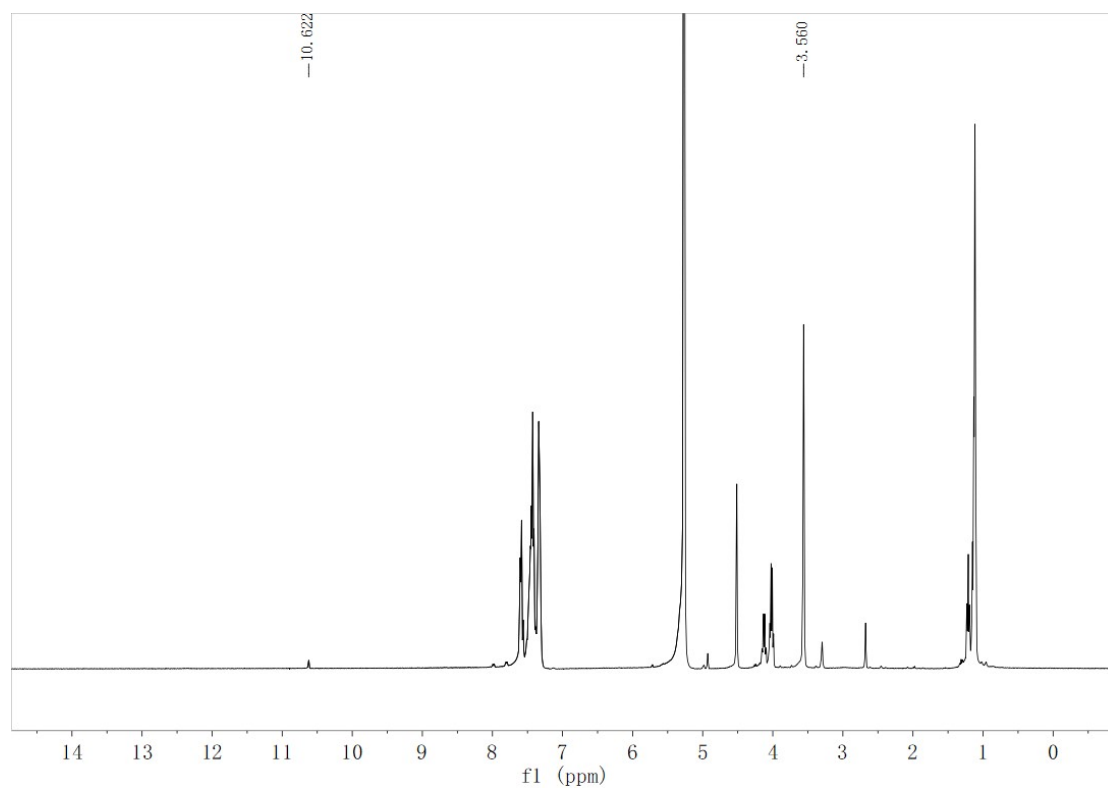

**Fig. S6**  $^1\text{H}$  spectra of the reaction mixture and 2.5  $\mu\text{L}$   $\text{H}_2\text{O}_2$  (30% aqueous) in dark (Ethanol- $d_6$ , 400 MHz). The peak at 10.62 ppm is due to  $\text{H}_2\text{O}_2$ .

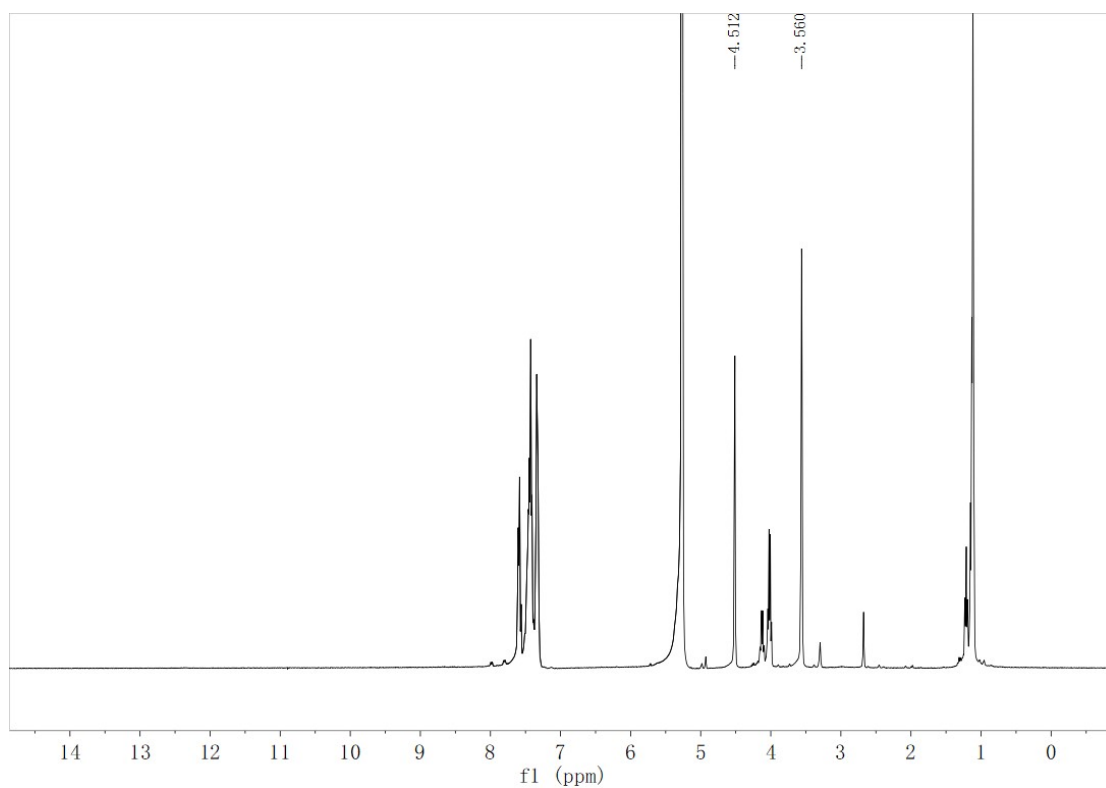

**Fig. S7**  $^1\text{H}$  spectra of the reaction mixture and 2.5  $\mu\text{L}$   $\text{H}_2\text{O}$  in dark (Ethanol- $d_6$ , 400 MHz). The peak at 4.51 ppm is due to  $\text{H}_2\text{O}$ .

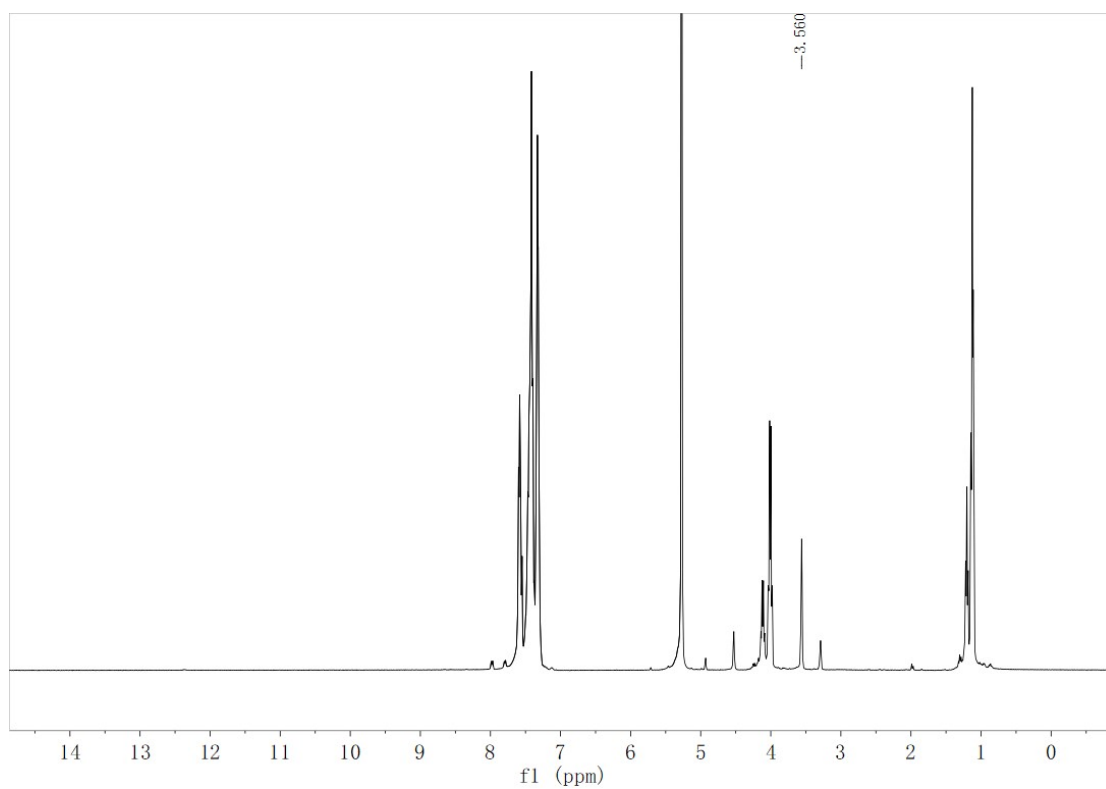

Fig. S8  $^1\text{H}$  spectra of **1a** (Ethanol- $d_6$ , 400 MHz).

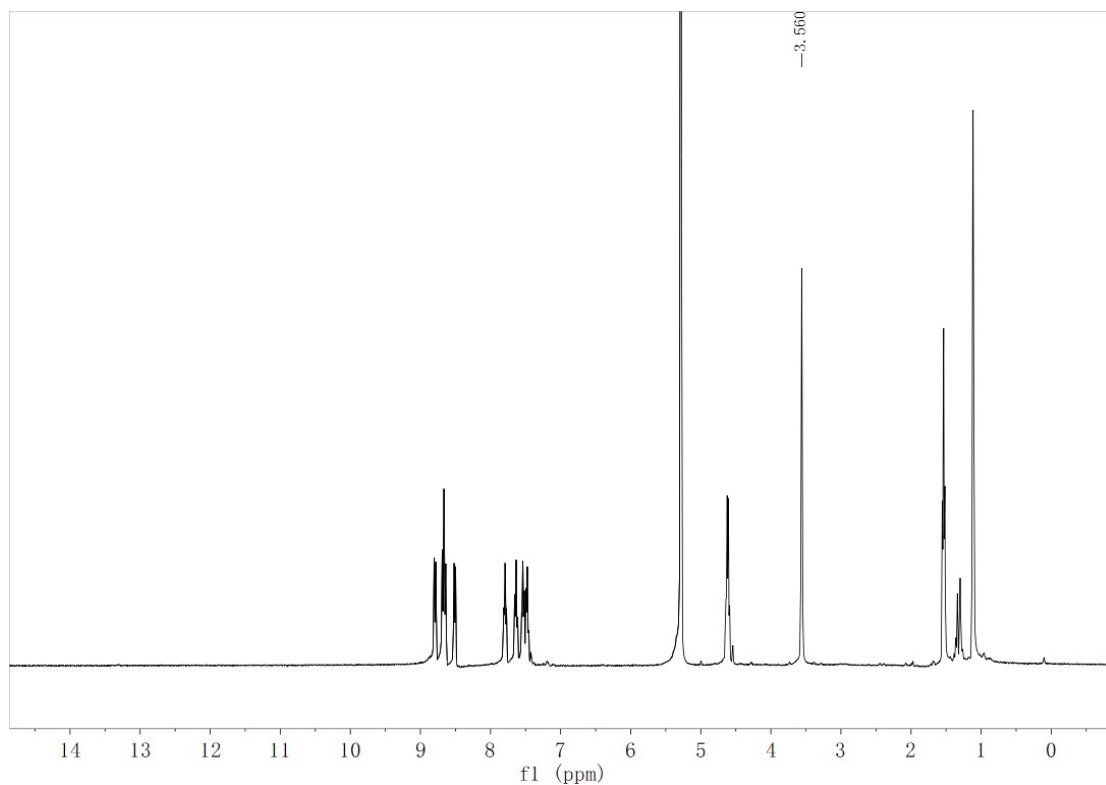

Fig. S9  $^1\text{H}$  spectra of **2a** (Ethanol- $d_6$ , 400 MHz).

We did not detect  $\text{H}_2\text{O}_2$  by *in situ*  $^1\text{H}$  NMR analysis after the reaction mixture in Ethanol- $d_6$  was irradiated with sunlight for 5 hours in air at room temperature (Fig. S5), increased possibly due to the  $\text{H}_2\text{O}_2$  participated in the catalytic cycle to convert  $\text{I}_2$  to IOH.

## 5.6 Electron paramagnetic resonance (EPR) experiments

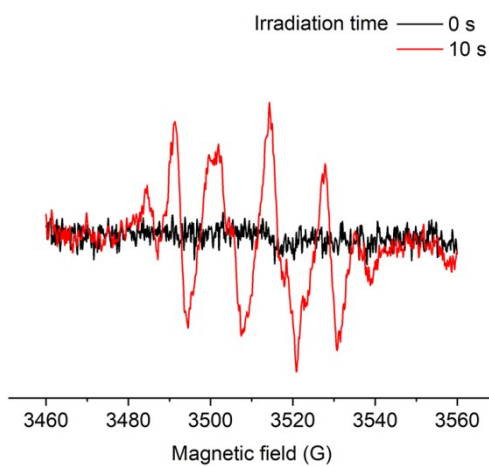

**Fig. S10** Electron spin resonance (ESR) spectrum: solution of DMPO (0.56 M), **1a** ( $2 \times 10^{-2}$  M) and NIS ( $1 \times 10^{-3}$  M) in air-saturated i-PrOH without irradiation (labeled by black line); solution of DMPO (0.56 M), **1a** ( $2 \times 10^{-2}$  M) and NIS ( $1 \times 10^{-3}$  M) in air-saturated i-PrOH upon irradiation with sunlight for 10 s (labeled by red line).

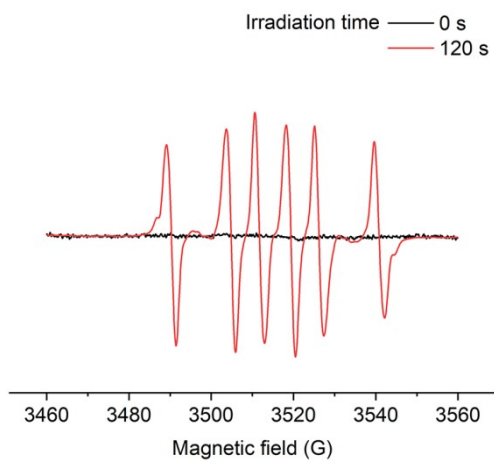

**Fig. S11** Electron spin resonance (ESR) spectrum: solution of DMPO (0.48 M), **1a** ( $2 \times 10^{-2}$  M) and NIS ( $1 \times 10^{-3}$  M) in deaerated i-PrOH without irradiation (labeled by black line); solution of DMPO (0.48 M), **1a** ( $2 \times 10^{-2}$  M) and NIS ( $1 \times 10^{-3}$  M) in deaerated i-PrOH upon irradiation with sunlight for 120 s (labeled by red line).

## 5.7 ESI-HRMS spectra

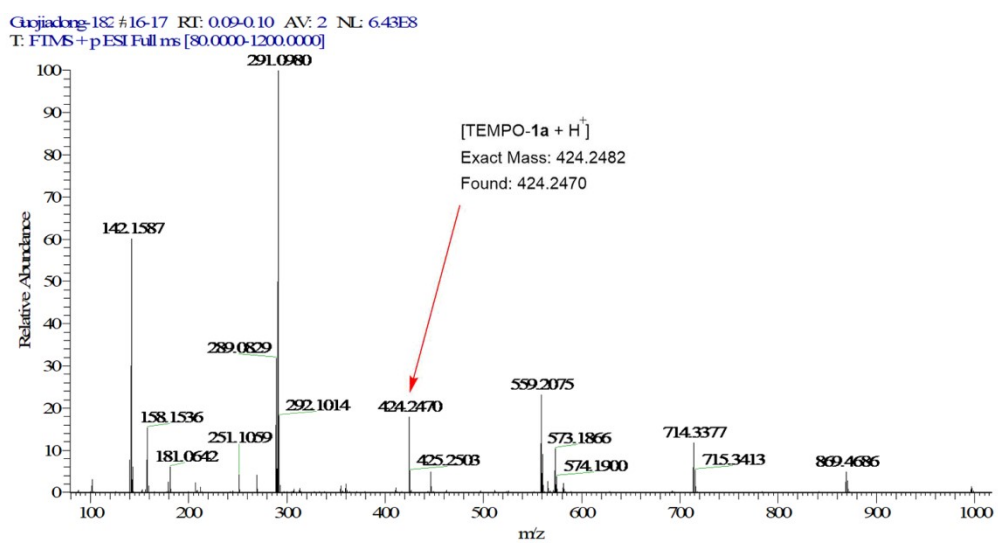

Fig. S12 ESI-HRMS spectra of TEMPO-1a.



## 5.8 Competing kinetic isotope effect (KIE) experiments

Intermolecular KIE with D<sub>5</sub>-**1a** and **1a**

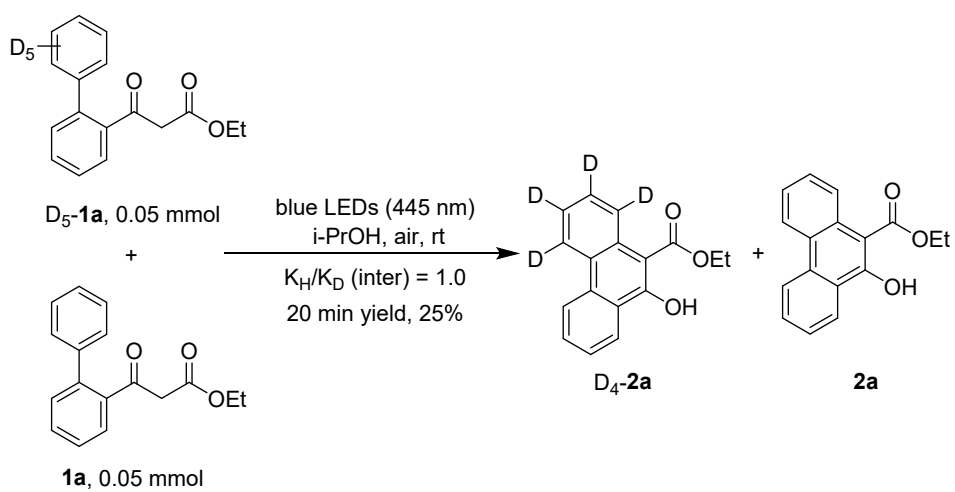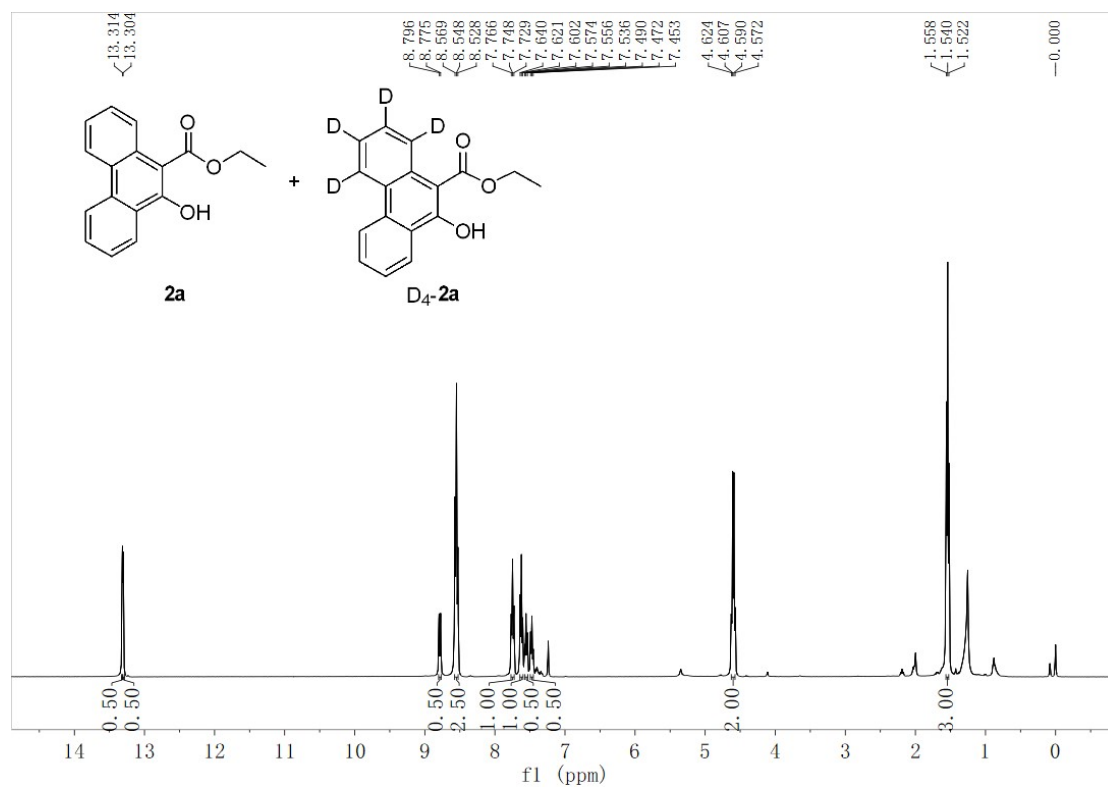

Fig. S13 Intermolecular KIE with D<sub>5</sub>-**1a** and **1a**.

## 5.9 Scale-up experiment

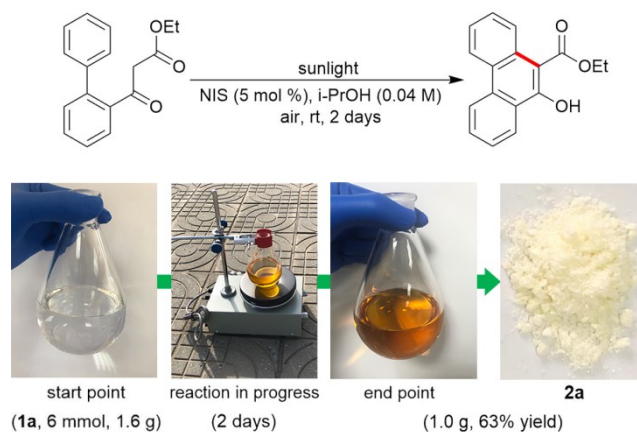

Fig. S14 Scale-up experiment.

Scale up experiment: A 250 mL eggplant-type flask was loaded with substrate **1a** (6 mmol, 1.6 g, 1 equiv), NIS (0.3 mmol, 67.5 mg, 0.05 equiv) in i-PrOH (0.04 M, 150 mL). The sample was then irradiated by sunlight for 20 h (2 days). Upon completion of the reaction, the solvent was then removed under vacuum. The residue was purified with chromatography column on silica gel using mixtures of petroleum ether and ethyl acetate to give the corresponding products **2a** (1.0 g, 63% yield).

## 5.10 Supplementary data

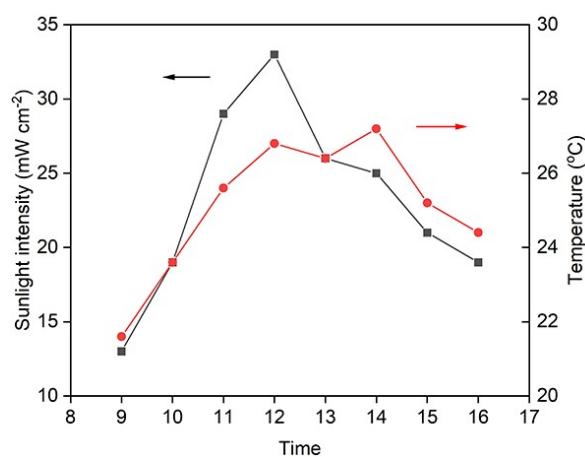

Figure S15. The variation of sunlight intensity (■) and ambient temperature (●) during sunlight photocatalysis.

## 6. Characterization Data for Compounds

### Ethyl 10-hydroxyphenanthrene-9-carboxylate

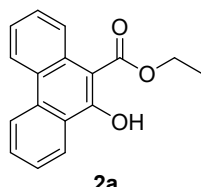

White solid; yield 23.2 mg, 87%;  $R_f$  = 0.36 (petroleum ether/ethyl acetate 50:1);  $^1\text{H NMR}$  (400 MHz,  $\text{CDCl}_3$ )  $\delta$  13.32 (s, 1H), 8.79 (d,  $J$  = 8.4 Hz, 1H), 8.58–8.53 (m, 3H), 7.76 (t,  $J$  = 7.2 Hz, 1H), 7.63 (t,  $J$  = 7.2 Hz, 1H), 7.56 (t,  $J$  = 6.8 Hz, 1H), 7.48 (t,  $J$  = 7.6 Hz, 1H), 4.60 (q,  $J$  = 7.2 Hz, 2H), 1.54 (t,  $J$  = 6.8 Hz, 3H);  $^{13}\text{C NMR}$  (101 MHz,  $\text{CDCl}_3$ )  $\delta$  173.1, 162.8, 133.8, 130.6, 129.6, 127.7, 127.0, 126.2, 126.1, 125.4, 125.1, 124.4, 123.0, 122.6, 101.7, 62.2, 14.5; **ESI-HRMS**:  $m/z$  Calcd for  $\text{C}_{17}\text{H}_{13}\text{O}_3^-$   $[\text{M}-\text{H}]^-$ : 265.0870, found 265.0870.

### Ethyl 10-hydroxy-7-methylphenanthrene-9-carboxylate

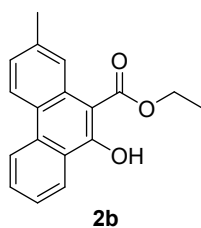

Pale yellow solid; yield 18.8 mg, 67%;  $R_f$  = 0.36 (petroleum ether/ethyl acetate 50:1);  $^1\text{H NMR}$  (400 MHz,  $\text{CDCl}_3$ )  $\delta$  13.23 (s, 1H), 8.54 (s, 1H), 8.47 (t,  $J$  = 9.6 Hz, 2H), 8.37 (d,  $J$  = 8.4 Hz, 1H), 7.68 (t,  $J$  = 7.2 Hz, 1H), 7.55 (t,  $J$  = 7.6 Hz, 1H), 7.25 (d,  $J$  = 8.4 Hz, 1H), 4.55 (q,  $J$  = 7.2 Hz, 2H), 2.49 (s, 3H), 1.52 (t,  $J$  = 7.2 Hz, 3H);  $^{13}\text{C NMR}$  (101 MHz,  $\text{CDCl}_3$ )  $\delta$  173.0, 162.8, 137.3, 133.8, 130.4, 129.6, 126.4, 126.1, 125.8, 125.0, 125.0, 124.0, 122.8, 122.3, 101.5, 62.0, 22.3, 14.4; **ESI-HRMS**:  $m/z$  Calcd for  $\text{C}_{18}\text{H}_{15}\text{O}_3^-$   $[\text{M}-\text{H}]^-$ : 279.1027, found 279.1028.

### Ethyl 7-ethyl-10-hydroxyphenanthrene-9-carboxylate

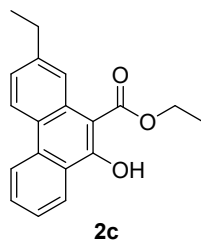

Pale yellow solid; yield 22.1 mg, 75%;  $R_f$  = 0.36 (petroleum ether/ethyl acetate 50:1);  $^1\text{H NMR}$  (400 MHz,  $\text{CDCl}_3$ )  $\delta$  13.26 (s, 1H), 8.59 (s, 1H), 8.47 (dd,  $J$  = 12.8 Hz,  $J$  = 8.4 Hz, 2H), 8.39 (d,  $J$  = 8.4 Hz, 1H), 7.67 (t,  $J$

= 8.0 Hz, 1H), 7.54 (t,  $J = 7.6$  Hz, 1H), 7.27 (d,  $J = 8.0$  Hz, 1H), 4.54 (q,  $J = 7.2$  Hz, 2H), 2.80 (q,  $J = 7.6$  Hz, 2H), 1.51 (t,  $J = 7.2$  Hz, 3H), 1.33 (t,  $J = 7.2$  Hz, 3H);  $^{13}\text{C NMR}$  (101 MHz,  $\text{CDCl}_3$ )  $\delta$  173.0, 162.9, 143.5, 133.8, 130.4, 129.7, 126.4, 125.0, 125.0, 124.7 ( $\times 2$ ), 124.2, 122.8, 122.3, 101.6, 62.0, 29.4, 15.4, 14.4; **ESI-HRMS**:  $m/z$  Calcd for  $\text{C}_{19}\text{H}_{17}\text{O}_3^-$   $[\text{M}-\text{H}]^-$ : 293.1183, found 293.1185.

#### Ethyl 7-(*tert*-butyl)-10-hydroxyphenanthrene-9-carboxylate

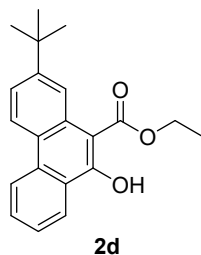

Pale yellow solid; yield 22.9 mg, 71%;  $R_f = 0.32$  (petroleum ether/ethyl acetate 50:1);  $^1\text{H NMR}$  (400 MHz,  $\text{CDCl}_3$ )  $\delta$  13.36 (s, 1H), 8.85 (s, 1H), 8.51–8.43 (m, 3H), 7.69 (t,  $J = 7.6$  Hz, 1H), 7.57–7.50 (m, 2H), 4.56 (q,  $J = 7.2$  Hz, 2H), 1.55 (t,  $J = 7.2$  Hz, 3H), 1.43 (s, 9H);  $^{13}\text{C NMR}$  (101 MHz,  $\text{CDCl}_3$ )  $\delta$  173.3, 163.1, 150.4, 133.7, 130.5, 129.4, 126.5, 125.1, 125.1, 124.0, 122.7, 122.4, 122.4 ( $\times 2$ ), 101.8, 62.0, 35.3, 31.6, 14.5; **ESI-HRMS**:  $m/z$  Calcd for  $\text{C}_{21}\text{H}_{21}\text{O}_3^-$   $[\text{M}-\text{H}]^-$ : 321.1496, found 321.1496.

#### Ethyl 10-hydroxy-7-pentylphenanthrene-9-carboxylate

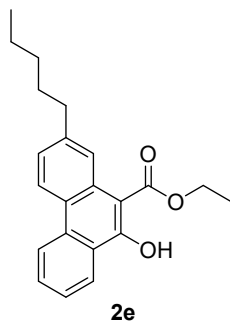

White solid; yield 28.3 mg, 84%;  $R_f = 0.32$  (petroleum ether/ethyl acetate 50:1);  $^1\text{H NMR}$  (400 MHz,  $\text{CDCl}_3$ )  $\delta$  13.24 (s, 1H), 8.63 (s, 1H), 8.56–8.48 (m, 3H), 7.75 (t,  $J = 7.2$  Hz, 1H), 7.60 (t,  $J = 8.0$  Hz, 1H), 7.33 (d,  $J = 8.4$  Hz, 1H), 4.61 (q,  $J = 7.2$  Hz, 2H), 2.79 (t,  $J = 7.2$  Hz, 2H), 1.77–1.75 (m, 2H), 1.57 (t,  $J = 6.8$  Hz, 3H), 1.39 (s, 4H), 0.92 (s, 3H);  $^{13}\text{C NMR}$  (101 MHz,  $\text{CDCl}_3$ )  $\delta$  173.1, 162.9, 142.3, 133.9, 130.5, 129.7, 126.5, 125.5, 125.3, 125.1, 125.0, 124.3, 122.8, 122.4, 101.6, 62.1, 36.6, 31.7, 31.1, 22.7, 14.4, 14.2; **ESI-HRMS**:  $m/z$  Calcd for  $\text{C}_{22}\text{H}_{23}\text{O}_3^-$   $[\text{M}-\text{H}]^-$ : 335.1653, found 335.1653.

### Ethyl 7-cyclohexyl-10-hydroxyphenanthrene-9-carboxylate

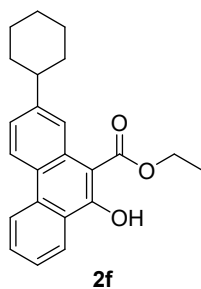

White solid; yield 23.7 mg, 68%;  $R_f$  = 0.32 (petroleum ether/ethyl acetate 50:1);  $^1\text{H NMR}$  (400 MHz,  $\text{CDCl}_3$ )  $\delta$  13.26 (s, 1H), 8.64 (s, 1H), 8.48 (dd,  $J$  = 11.2 Hz,  $J$  = 8.8 Hz, 2H), 8.40 (d,  $J$  = 8.4 Hz, 1H), 7.67 (t,  $J$  = 7.2 Hz, 1H), 7.54 (t,  $J$  = 7.6 Hz, 1H), 7.29 (d,  $J$  = 8.0 Hz, 1H), 4.55 (q,  $J$  = 7.2 Hz, 2H), 2.67–2.61 (m, 1H), 1.94 (dd,  $J$  = 42.8 Hz,  $J$  = 10.8 Hz, 4H), 1.79 (d,  $J$  = 12.8 Hz, 1H), 1.53 (t,  $J$  = 7.2 Hz, 3H), 1.50–1.40 (m, 3H), 1.33–1.25 (m, 2H);  $^{13}\text{C NMR}$  (101 MHz,  $\text{CDCl}_3$ )  $\delta$  173.1, 162.9, 147.3, 133.8, 130.4, 129.7, 126.4, 125.0 ( $\times 2$ ), 124.4, 124.0, 123.8, 122.8, 122.3, 101.7, 62.0, 45.0, 34.8, 27.1, 26.5, 14.5; **ESI-HRMS**:  $m/z$  Calcd for  $\text{C}_{23}\text{H}_{23}\text{O}_3^-$   $[\text{M}-\text{H}]^-$ : 347.1653, found 347.1652.

### Diethyl 9-hydroxyphenanthrene-2,10-dicarboxylate

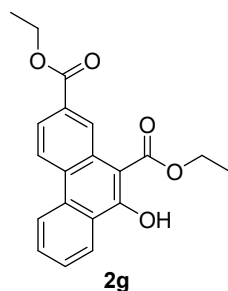

White solid; yield 21.7 mg, 64%;  $R_f$  = 0.34 (petroleum ether/ethyl acetate 20:1);  $^1\text{H NMR}$  (400 MHz,  $\text{CDCl}_3$ )  $\delta$  13.44 (s, 1H), 9.56 (s, 1H), 8.55 (t,  $J$  = 8.0 Hz, 3H), 8.06 (d,  $J$  = 8.4 Hz, 1H), 7.78 (t,  $J$  = 7.2 Hz, 1H), 7.67 (t,  $J$  = 7.6 Hz, 1H), 4.61 (q,  $J$  = 6.8 Hz, 2H), 4.45 (q,  $J$  = 6.8 Hz, 2H), 1.62 (t,  $J$  = 6.8 Hz, 3H), 1.46 (t,  $J$  = 7.2 Hz, 3H);  $^{13}\text{C NMR}$  (101 MHz,  $\text{CDCl}_3$ )  $\delta$  172.8, 167.1, 163.4, 133.0, 130.8, 129.2, 129.1, 129.1, 128.4, 128.0, 126.2, 125.2, 124.4, 123.2, 123.0, 101.6, 62.5, 61.2, 14.6, 14.3; **ESI-HRMS**:  $m/z$  Calcd for  $\text{C}_{20}\text{H}_{17}\text{O}_5^-$   $[\text{M}-\text{H}]^-$ : 337.1081, found 337.1082.

### Ethyl 10-hydroxy-7-methoxyphenanthrene-9-carboxylate

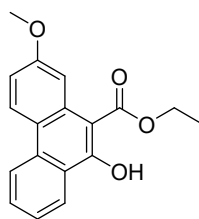

**2h**

White solid; yield 23.1 mg, 78%;  $R_f$  = 0.33 (petroleum ether/ethyl acetate 20:1);  $^1\text{H NMR}$  (400 MHz,  $\text{CDCl}_3$ )  $\delta$  13.43 (s, 1H), 8.50 (d,  $J$  = 8.4 Hz, 1H), 8.46 (d,  $J$  = 8.8 Hz, 2H), 8.33 (s, 1H), 7.72 (t,  $J$  = 7.2 Hz, 1H), 7.56 (t,  $J$  = 7.2 Hz, 1H), 7.10 (d,  $J$  = 8.8 Hz, 1H), 4.59 (q,  $J$  = 6.8 Hz, 2H), 3.93 (s, 3H), 1.56 (t,  $J$  = 6.8 Hz, 3H);  $^{13}\text{C NMR}$  (101 MHz,  $\text{CDCl}_3$ )  $\delta$  173.1, 163.8, 159.2, 134.0, 131.2, 130.7, 125.9, 125.2, 124.4, 124.3, 122.1, 120.4, 113.7, 108.2, 101.3, 62.1, 55.3, 14.5; **ESI-HRMS**:  $m/z$  Calcd for  $\text{C}_{18}\text{H}_{15}\text{O}_4^-$   $[\text{M}-\text{H}]^-$ : 295.0976, found 295.0973.

#### Ethyl 7-fluoro-10-hydroxyphenanthrene-9-carboxylate

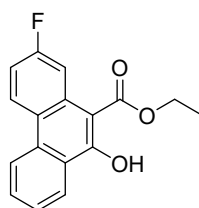

**2i**

White solid; yield 25.6 mg, 90%;  $R_f$  = 0.30 (petroleum ether/ethyl acetate 50:1);  $^1\text{H NMR}$  (400 MHz,  $\text{CDCl}_3$ )  $\delta$  13.49 (s, 1H), 8.46–8.35 (m, 4H), 7.69 (t,  $J$  = 6.8 Hz, 1H), 7.56 (t,  $J$  = 7.2 Hz, 1H), 7.14 (t,  $J$  = 8.0 Hz, 1H), 4.57 (q,  $J$  = 7.2 Hz, 2H), 1.54 (t,  $J$  = 7.2 Hz, 3H);  $^{13}\text{C NMR}$  (101 MHz,  $\text{CDCl}_3$ )  $\delta$  172.7, 164.1, 162.3 (d,  $^1J_{\text{C,F}}$  = 244.6 Hz), 133.4, 131.3 (d,  $^3J_{\text{C,F}}$  = 10.2 Hz), 130.8, 126.7, 125.2, 124.9, 124.8, 122.6 (d,  $^4J_{\text{C,F}}$  = 1.3 Hz), 122.3, 112.6 (d,  $^2J_{\text{C,F}}$  = 23.6 Hz), 111.6 (d,  $^2J_{\text{C,F}}$  = 25.7 Hz), 101.0 (d,  $^4J_{\text{C,F}}$  = 3.1 Hz), 62.4, 14.4;  $^{19}\text{F NMR}$  (377 MHz,  $\text{CDCl}_3$ )  $\delta$  -112.74 (s, 1F); **ESI-HRMS**:  $m/z$  Calcd for  $\text{C}_{17}\text{H}_{12}\text{FO}_3^-$   $[\text{M}-\text{H}]^-$ : 283.0776, found 283.0781.

#### Ethyl 7-chloro-10-hydroxyphenanthrene-9-carboxylate

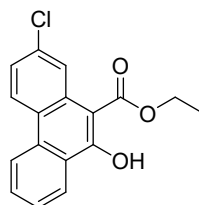

**2j**

White solid; yield 21.1 mg, 70%;  $R_f$  = 0.30 (petroleum ether/ethyl acetate 50:1);  $^1\text{H NMR}$  (400 MHz,  $\text{CDCl}_3$ )  $\delta$  13.42 (s, 1H), 8.71 (s, 1H), 8.44 (d,  $J$  = 8.0 Hz, 1H), 8.33 (dd,  $J$  = 15.6 Hz,  $J$  = 8.4 Hz, 2H), 7.68 (t,  $J$  = 7.2 Hz, 1H), 7.57 (t,  $J$  = 7.2 Hz, 1H), 7.33 (d,  $J$  = 8.8 Hz, 1H), 4.57 (q,  $J$  = 7.2 Hz, 2H), 1.54 (t,  $J$  = 6.8 Hz, 3H);  $^{13}\text{C}$

**NMR** (101 MHz, CDCl<sub>3</sub>) δ 172.6, 163.8, 133.8, 133.1, 130.8, 130.7, 127.1, 125.6, 125.2 (×2), 124.5, 124.4, 124.2, 122.4, 100.7, 62.4, 14.3; **ESI-HRMS**: m/z Calcd for C<sub>17</sub>H<sub>12</sub>ClO<sub>3</sub><sup>-</sup> [M-H]<sup>-</sup>: 299.0480, found 299.0479.

**Ethyl 10-hydroxy-7-(trifluoromethyl)phenanthrene-9-carboxylate**

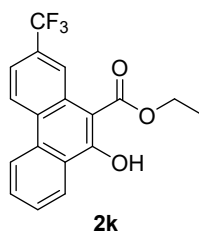

White solid; yield 29.1 mg, 87%; **R<sub>f</sub>** = 0.30 (petroleum ether/ethyl acetate 50:1); **<sup>1</sup>H NMR** (400 MHz, CDCl<sub>3</sub>) δ 13.42 (s, 1H), 9.05 (s, 1H), 8.44 (d, *J* = 8.0 Hz, 2H), 8.39 (d, *J* = 8.4 Hz, 1H), 7.71 (t, *J* = 6.8 Hz, 1H), 7.61 (t, *J* = 7.6 Hz, 1H), 7.55 (d, *J* = 8.4 Hz, 1H), 4.55 (q, *J* = 6.8 Hz, 2H), 1.54 (t, *J* = 6.8 Hz, 3H); **<sup>13</sup>C NMR** (101 MHz, CDCl<sub>3</sub>) δ 172.5, 163.8, 132.7, 130.9, 129.1, 129.1 (d, <sup>2</sup>*J*<sub>C,F</sub> = 32.0 Hz), 128.0, 127.9, 126.0, 125.2, 124.8 (d, <sup>1</sup>*J*<sub>C,F</sub> = 273.2 Hz), 123.5, 123.5, 122.8, 120.1 (d, <sup>4</sup>*J*<sub>C,F</sub> = 3.0 Hz), 101.1, 62.5, 14.1; **<sup>19</sup>F NMR** (377 MHz, CDCl<sub>3</sub>) δ -62.41 (s, 3F); **ESI-HRMS**: m/z Calcd for C<sub>18</sub>H<sub>12</sub>F<sub>3</sub>O<sub>3</sub><sup>-</sup> [M-H]<sup>-</sup>: 333.0744, found 333.0744.

**Ethyl 7-cyano-10-hydroxyphenanthrene-9-carboxylate**

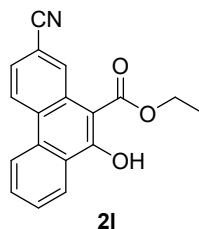

White solid; yield 27.4 mg, 94%; **R<sub>f</sub>** = 0.40 (petroleum ether/ethyl acetate 10:1); **<sup>1</sup>H NMR** (400 MHz, CDCl<sub>3</sub>) δ 13.57 (s, 1H), 9.16 (s, 1H), 8.60–8.52 (m, 3H), 7.83 (t, *J* = 7.2 Hz, 1H), 7.73 (t, *J* = 7.6 Hz, 1H), 7.65 (d, *J* = 8.8 Hz, 1H), 4.65 (q, *J* = 7.2 Hz, 2H), 1.58 (t, *J* = 7.2 Hz, 3H); **<sup>13</sup>C NMR** (101 MHz, CDCl<sub>3</sub>) δ 172.4, 164.2, 132.6, 131.3, 131.2, 129.5, 128.8, 128.6, 126.4, 126.0, 125.5, 123.9, 123.1, 119.8, 111.1, 100.7, 62.8, 14.5; **ESI-HRMS**: m/z Calcd for C<sub>18</sub>H<sub>12</sub>NO<sub>3</sub><sup>-</sup> [M-H]<sup>-</sup>: 290.0823, found 290.0818.

**Ethyl 7-(4-chlorophenyl)-10-hydroxyphenanthrene-9-carboxylate**

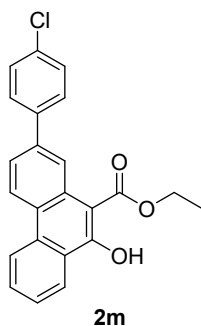

White solid; yield 28.3 mg, 75%;  $R_f = 0.40$  (petroleum ether/ethyl acetate 50:1);  **$^1\text{H NMR}$**  (400 MHz,  $\text{CDCl}_3$ )  $\delta$  13.36 (s, 1H), 8.93 (s, 1H), 8.48–8.42 (m, 3H), 7.68 (t,  $J = 7.2$  Hz, 1H), 7.58–7.54 (m, 4H), 7.41 (d,  $J = 8.0$  Hz, 2H), 4.52 (q,  $J = 6.8$  Hz, 2H), 1.50 (t,  $J = 6.8$  Hz, 3H);  **$^{13}\text{C NMR}$**  (101 MHz,  $\text{CDCl}_3$ )  $\delta$  172.9, 163.4, 140.0, 138.6, 133.6, 133.4, 130.6, 129.9, 129.1, 128.5, 127.0, 125.4, 125.4, 125.2, 124.5, 123.5, 122.8, 122.5, 101.4, 62.2, 14.4; **ESI-HRMS**:  $m/z$  Calcd for  $\text{C}_{23}\text{H}_{16}\text{ClO}_3^-$   $[\text{M}-\text{H}]^-$ : 375.0793, found 375.0794.

**Ethyl 10-hydroxy-7-(naphthalen-2-yl)phenanthrene-9-carboxylate**

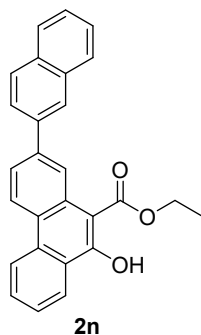

White solid; yield 32.2 mg, 82%;  $R_f = 0.35$  (petroleum ether/ethyl acetate 50:1);  **$^1\text{H NMR}$**  (400 MHz,  $\text{CDCl}_3$ )  $\delta$  13.41 (s, 1H), 9.21 (s, 1H), 8.60 (d,  $J = 8.4$  Hz, 1H), 8.55 (t,  $J = 7.2$  Hz, 2H), 8.17 (s, 1H), 7.96–7.82 (m, 5H), 7.75 (t,  $J = 7.2$  Hz, 1H), 7.62 (t,  $J = 7.6$  Hz, 1H), 7.52–7.48 (m, 2H), 4.59 (q,  $J = 6.8$  Hz, 2H), 1.59 (t,  $J = 6.8$  Hz, 3H);  **$^{13}\text{C NMR}$**  (101 MHz,  $\text{CDCl}_3$ )  $\delta$  173.1, 163.4, 139.9, 138.9, 134.0, 133.6, 132.9, 130.7, 130.0, 128.7, 128.4, 127.8, 127.0, 126.5, 126.2, 126.1, 125.7, 125.4, 125.4, 125.2, 125.1, 123.6, 123.5, 122.6, 101.7, 62.2, 14.5; **ESI-HRMS**:  $m/z$  Calcd for  $\text{C}_{27}\text{H}_{19}\text{O}_3^-$   $[\text{M}-\text{H}]^-$ : 391.1340, found 391.1342.

**Ethyl 10-hydroxy-5-methylphenanthrene-9-carboxylate**

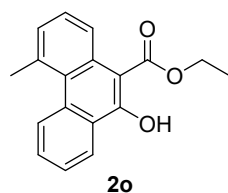



Pale yellow solid; yield 14.6 mg, 52%;  $R_f = 0.41$  (petroleum ether/ethyl acetate 50:1);  $^1\text{H NMR}$  (400 MHz,  $\text{CDCl}_3$ )  $\delta$  12.86 (s, 1H), 8.60–8.55 (m, 3H), 7.67 (t,  $J = 7.2$  Hz, 1H), 7.59 (t,  $J = 7.2$  Hz, 1H), 7.41 (t,  $J = 7.6$  Hz, 1H), 7.31 (d,  $J = 7.2$  Hz, 1H), 4.56 (q,  $J = 7.2$  Hz, 2H), 2.99 (s, 3H), 1.49 (t,  $J = 7.2$  Hz, 3H);  $^{13}\text{C NMR}$  (101 MHz,  $\text{CDCl}_3$ )  $\delta$  172.7, 161.4, 135.2, 134.5, 130.9, 129.1, 128.8, 127.7, 126.7, 126.5, 126.4, 126.3, 124.6, 124.0, 102.7, 62.1, 27.3, 14.5; **ESI-HRMS**:  $m/z$  Calcd for  $\text{C}_{18}\text{H}_{15}\text{O}_3^-$   $[\text{M}-\text{H}]^-$ : 279.1027, found 279.1029.

#### Ethyl 10-hydroxy-5-phenylphenanthrene-9-carboxylate

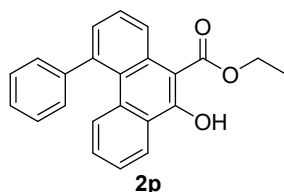

White solid; yield 15.8 mg, 46%;  $R_f = 0.32$  (petroleum ether/ethyl acetate 50:1);  $^1\text{H NMR}$  (400 MHz,  $\text{CDCl}_3$ )  $\delta$  13.08 (s, 1H), 8.73 (d,  $J = 8.0$  Hz, 1H), 8.48 (d,  $J = 8.0$  Hz, 1H), 7.60 (d,  $J = 8.4$  Hz, 1H), 7.52 (t,  $J = 7.6$  Hz, 1H), 7.43–7.30 (m, 7H), 7.14 (t,  $J = 7.2$  Hz, 1H), 4.60 (q,  $J = 6.8$  Hz, 2H), 1.53 (t,  $J = 7.2$  Hz, 3H);  $^{13}\text{C NMR}$  (101 MHz,  $\text{CDCl}_3$ )  $\delta$  172.8, 162.3, 145.6, 140.6, 133.7, 131.1, 129.2, 129.1, 129.0, 128.8, 128.2, 127.1, 126.5, 126.4, 126.4, 125.2, 125.0, 124.4, 102.1, 62.2, 14.5; **ESI-HRMS**:  $m/z$  Calcd for  $\text{C}_{23}\text{H}_{17}\text{O}_3^-$   $[\text{M}-\text{H}]^-$ : 341.1183, found 341.1182.

#### Ethyl 10-hydroxy-5-methoxyphenanthrene-9-carboxylate

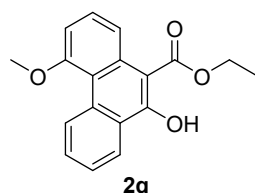

Pale yellow solid; yield 17.2 mg, 58%;  $R_f = 0.35$  (petroleum ether/ethyl acetate 20:1);  $^1\text{H NMR}$  (400 MHz,  $\text{CDCl}_3$ )  $\delta$  12.95 (s, 1H), 9.57 (d,  $J = 8.8$  Hz, 1H), 8.58 (d,  $J = 8.0$  Hz, 1H), 8.37 (d,  $J = 8.4$  Hz, 1H), 7.74 (t,  $J = 7.2$  Hz, 1H), 7.62 (t,  $J = 7.6$  Hz, 1H), 7.48 (t,  $J = 8.0$  Hz, 1H), 7.03 (d,  $J = 8.0$  Hz, 1H), 4.58 (q,  $J = 6.8$  Hz, 2H), 4.08 (s, 3H), 1.52 (t,  $J = 7.2$  Hz, 3H);  $^{13}\text{C NMR}$  (101 MHz,  $\text{CDCl}_3$ )  $\delta$  172.8, 162.1, 158.8, 133.4, 132.0, 130.1, 128.6, 127.3, 126.3, 125.6, 124.3, 118.7, 117.0, 106.9, 102.3, 62.2, 55.9, 14.5; **ESI-HRMS**:  $m/z$  Calcd for  $\text{C}_{18}\text{H}_{15}\text{O}_4^-$   $[\text{M}-\text{H}]^-$ : 295.0976, found 295.0973.

#### Ethyl 5-fluoro-10-hydroxyphenanthrene-9-carboxylate

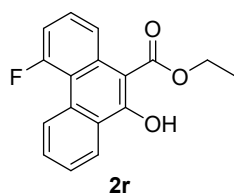

White solid; yield 14.3 mg, 50%;  $R_f$  = 0.38 (petroleum ether/ethyl acetate 50:1);  **$^1\text{H NMR}$**  (400 MHz,  $\text{CDCl}_3$ )  $\delta$  13.21 (s, 1H), 9.02–9.00 (m, 1H), 8.56 (t,  $J$  = 8.8 Hz, 2H), 7.77 (t,  $J$  = 7.6 Hz, 1H), 7.65 (t,  $J$  = 7.6 Hz, 1H), 7.46 (q,  $J$  = 8.0 Hz, 1H), 7.19 (dd,  $J$  = 14.0 Hz,  $J$  = 7.6 Hz, 1H), 4.59 (q,  $J$  = 7.2 Hz, 2H), 1.53 (t,  $J$  = 7.2 Hz, 3H);  **$^{13}\text{C NMR}$**  (101 MHz,  $\text{CDCl}_3$ )  $\delta$  172.7, 163.0, 161.7 (d,  $^1J_{\text{C,F}}$  = 252.4 Hz), 132.1 (d,  $^3J_{\text{C,F}}$  = 3.9 Hz), 131.5 (d,  $^3J_{\text{C,F}}$  = 5.1 Hz), 130.9 (d,  $^4J_{\text{C,F}}$  = 2.6 Hz), 127.7 (d,  $^2J_{\text{C,F}}$  = 21.7 Hz), 127.5 (d,  $^4J_{\text{C,F}}$  = 3.7 Hz), 127.2 (d,  $^4J_{\text{C,F}}$  = 1.6 Hz), 125.8, 124.8, 121.8 (d,  $^4J_{\text{C,F}}$  = 3.4 Hz), 115.8 (d,  $^3J_{\text{C,F}}$  = 9.1 Hz), 111.5 (d,  $^2J_{\text{C,F}}$  = 25.3 Hz), 101.7 (d,  $^4J_{\text{C,F}}$  = 1.9 Hz), 62.4, 14.5;  **$^{19}\text{F NMR}$**  (377 MHz,  $\text{CDCl}_3$ )  $\delta$  -108.68 (s, 1F); **ESI-HRMS**:  $m/z$  Calcd for  $\text{C}_{17}\text{H}_{12}\text{FO}_3^-$  [ $\text{M}-\text{H}$ ] $^-$ : 283.0776, found 283.0774.

#### Ethyl 5-chloro-10-hydroxyphenanthrene-9-carboxylate

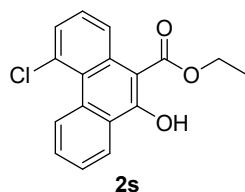

Pale yellow solid; yield 19.3 mg, 64%;  $R_f$  = 0.41 (petroleum ether/ethyl acetate 50:1);  **$^1\text{H NMR}$**  (400 MHz,  $\text{CDCl}_3$ )  $\delta$  13.00 (s, 1H), 9.59 (d,  $J$  = 8.4 Hz, 1H), 8.65 (d,  $J$  = 8.4 Hz, 1H), 8.57 (d,  $J$  = 8.0 Hz, 1H), 7.74 (t,  $J$  = 6.8 Hz, 1H), 7.67 (t,  $J$  = 7.6 Hz, 1H), 7.56 (d,  $J$  = 7.6 Hz, 1H), 7.40 (t,  $J$  = 8.0 Hz, 1H), 4.59 (q,  $J$  = 6.8 Hz, 2H), 1.52 (t,  $J$  = 7.2 Hz, 3H);  **$^{13}\text{C NMR}$**  (101 MHz,  $\text{CDCl}_3$ )  $\delta$  172.3, 162.3, 132.6, 132.5, 131.7, 129.2, 128.5, 127.7, 127.4, 127.0, 126.5, 124.8, 124.5, 124.1, 102.1, 62.4, 14.5; **ESI-HRMS**:  $m/z$  Calcd for  $\text{C}_{17}\text{H}_{12}\text{ClO}_3^-$  [ $\text{M}-\text{H}$ ] $^-$ : 299.0480, found 299.0480.

#### Ethyl 8-cyano-10-hydroxyphenanthrene-9-carboxylate and ethyl 6-cyano-10-hydroxyphenanthrene-9-carboxylate

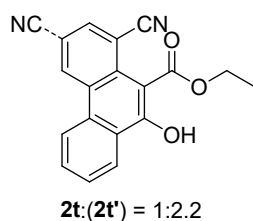

White solid; yield 26.2 mg, 90%;  $R_f = 0.39$  (petroleum ether/ethyl acetate 10:1);  $^1\text{H NMR}$  (400 MHz,  $\text{CDCl}_3$ )  $\delta$  13.57 (s, 1H), 11.57 (s, 0.45H), 8.71 (d,  $J = 8.8$  Hz, 1H), 8.63–8.60 (m, 1.45H), 8.43–8.40 (m, 2H), 8.29 (d,  $J = 8.0$  Hz, 1H), 7.87 (d,  $J = 7.2$  Hz, 0.45H), 7.77–7.73 (m, 1.45H), 7.66–7.59 (m, 2.35H), 7.47 (t,  $J = 8.0$  Hz, 0.45H), 4.59 (q,  $J = 6.8$  Hz, 2.9H), 1.55 (t,  $J = 6.8$  Hz, 3H), 1.42 (t,  $J = 7.2$  Hz, 1.35H);  $^{13}\text{C NMR}$  (101 MHz,  $\text{CDCl}_3$ )  $\delta$  172.3, 170.4, 164.9, 160.9, 134.6, 132.5, 132.4, 132.3, 131.3, 130.9, 130.0, 129.0, 128.1, 128.0, 127.7, 127.1, 127.1, 126.7, 125.6, 125.5, 125.2, 125.0, 124.1, 122.5, 122.2, 119.5, 119.4, 109.6, 107.3, 102.4, 101.0, 62.7, 62.1, 14.4, 13.9; **ESI-HRMS**:  $m/z$  Calcd for  $\text{C}_{18}\text{H}_{12}\text{NO}_3^-$   $[\text{M}-\text{H}]^-$ : 290.0823, found 290.0819.

#### Ethyl 6,8-dichloro-10-hydroxyphenanthrene-9-carboxylate

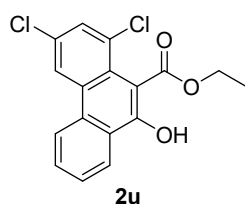

White solid; yield 18.1 mg, 54%;  $R_f = 0.46$  (petroleum ether/ethyl acetate 20:1);  $^1\text{H NMR}$  (400 MHz,  $\text{CDCl}_3$ )  $\delta$  10.55 (s, 1H), 8.45 (d,  $J = 8.4$  Hz, 2H), 8.41 (d,  $J = 1.6$  Hz, 1H), 7.78 (t,  $J = 7.2$  Hz, 1H), 7.69 (t,  $J = 7.6$  Hz, 1H), 7.59 (d,  $J = 2.0$  Hz, 1H), 4.44 (q,  $J = 6.8$  Hz, 2H), 1.36 (t,  $J = 6.8$  Hz, 3H);  $^{13}\text{C NMR}$  (101 MHz,  $\text{CDCl}_3$ )  $\delta$  170.7, 158.3, 132.1, 131.9, 130.7, 130.5, 129.5, 129.4, 128.4, 126.5, 125.3, 124.9, 123.0, 121.3, 103.3, 62.3, 14.1; **ESI-HRMS**:  $m/z$  Calcd for  $\text{C}_{17}\text{H}_{11}\text{Cl}_2\text{O}_3^-$   $[\text{M}-\text{H}]^-$ : 333.0091, found 333.0093.

#### Ethyl 2-fluoro-10-hydroxyphenanthrene-9-carboxylate

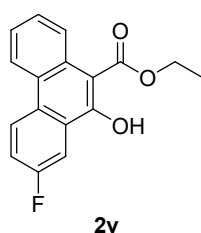

Pale yellow solid; yield 27.9 mg, 98%;  $R_f = 0.38$  (petroleum ether/ethyl acetate 50:1);  $^1\text{H NMR}$  (400 MHz,  $\text{CDCl}_3$ )  $\delta$  13.19 (s, 1H), 8.78 (d,  $J = 8.4$  Hz, 1H), 8.56–8.53 (m, 1H), 8.48 (d,  $J = 8.0$  Hz, 1H), 8.14 (d,  $J = 9.6$  Hz, 1H), 7.56 (t,  $J = 6.8$  Hz, 1H), 7.48 (t,  $J = 8.0$  Hz, 2H), 4.62 (q,  $J = 7.2$  Hz, 2H), 1.55 (t,  $J = 6.8$  Hz, 3H);  $^{13}\text{C NMR}$  (101 MHz,  $\text{CDCl}_3$ )  $\delta$  172.8, 161.7 (d,  $^1J_{\text{C,F}} = 247.9$  Hz), 161.6 (d,  $^4J_{\text{C,F}} = 3.3$  Hz), 130.2, 129.0, 127.5, 126.9 (d,  $^3J_{\text{C,F}} = 8.7$  Hz), 126.1, 125.8, 125.0 (d,  $^3J_{\text{C,F}} = 8.3$  Hz), 124.6, 122.7, 119.2 (d,  $^2J_{\text{C,F}} = 23.8$  Hz), 109.8 (d,  $^2J_{\text{C,F}} = 22.8$  Hz), 102.6, 62.3, 14.4;  $^{19}\text{F NMR}$  (377 MHz,  $\text{CDCl}_3$ )  $\delta$  -113.76 (s, 1F); **ESI-HRMS**:  $m/z$  Calcd for  $\text{C}_{17}\text{H}_{12}\text{FO}_3^-$   $[\text{M}-\text{H}]^-$ : 283.0776, found 283.0784.

### Ethyl 10-hydroxy-2-methoxyphenanthrene-9-carboxylate

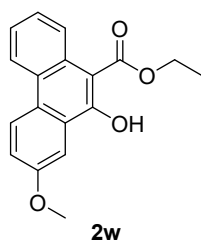

White solid; yield 21.1 mg, 71%;  $R_f$  = 0.37 (petroleum ether/ethyl acetate 20:1);  $^1\text{H NMR}$  (400 MHz,  $\text{CDCl}_3$ )  $\delta$  13.39 (s, 1H), 8.77 (d,  $J$  = 8.4 Hz, 1H), 8.42 (d,  $J$  = 8.8 Hz, 2H), 7.86 (s, 1H), 7.53 (t,  $J$  = 7.2 Hz, 1H), 7.42 (t,  $J$  = 8.0 Hz, 1H), 7.19 (d,  $J$  = 8.8 Hz, 1H), 4.57 (q,  $J$  = 6.8 Hz, 2H), 3.98 (s, 3H), 1.52 (t,  $J$  = 7.2 Hz, 3H);  $^{13}\text{C NMR}$  (101 MHz,  $\text{CDCl}_3$ )  $\delta$  173.1, 163.3, 161.7, 135.9, 130.3, 127.8, 127.1, 126.2, 125.7, 123.9, 123.0, 119.6, 116.4, 104.3, 99.9, 61.9, 55.6, 14.5; **ESI-HRMS**:  $m/z$  Calcd for  $\text{C}_{18}\text{H}_{15}\text{O}_4^-$  [M-H] $^-$ : 295.0976, found 295.0973.

### Ethyl 3-fluoro-10-hydroxyphenanthrene-9-carboxylate

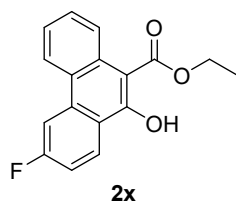

Pale yellow solid; yield 26.2 mg, 92%;  $R_f$  = 0.41 (petroleum ether/ethyl acetate 50:1);  $^1\text{H NMR}$  (400 MHz,  $\text{CDCl}_3$ )  $\delta$  13.35 (s, 1H), 8.76 (d,  $J$  = 7.6 Hz, 1H), 8.49–8.48 (m, 1H), 8.35 (d,  $J$  = 7.2 Hz, 1H), 8.10 (d,  $J$  = 10.8 Hz, 1H), 7.55 (t,  $J$  = 7.6 Hz, 1H), 7.44 (t,  $J$  = 7.2 Hz, 1H), 7.33–7.29 (m, 1H), 4.59 (q,  $J$  = 7.2 Hz, 2H), 1.54 (t,  $J$  = 7.2 Hz, 3H);  $^{13}\text{C NMR}$  (101 MHz,  $\text{CDCl}_3$ )  $\delta$  173.0, 164.3 (d,  $^1J_{\text{C,F}}$  = 251.0 Hz), 162.5, 136.1 (d,  $^3J_{\text{C,F}}$  = 9.2 Hz), 130.1, 128.3, 128.0 (d,  $^3J_{\text{C,F}}$  = 9.6 Hz), 126.2, 125.4 (d,  $^4J_{\text{C,F}}$  = 3.6 Hz), 124.4, 123.1, 122.0, 115.8 (d,  $^2J_{\text{C,F}}$  = 23.6 Hz), 107.9 (d,  $^2J_{\text{C,F}}$  = 23.0 Hz), 101.1, 62.2, 14.5;  $^{19}\text{F NMR}$  (377 MHz,  $\text{CDCl}_3$ )  $\delta$  -108.12 (s, 1F); **ESI-HRMS**:  $m/z$  Calcd for  $\text{C}_{17}\text{H}_{12}\text{FO}_3^-$  [M-H] $^-$ : 283.0776, found 283.0783.

### Ethyl 10-hydroxy-3-methoxyphenanthrene-9-carboxylate

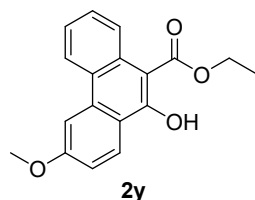

White solid; yield 13.1 mg, 44%;  $R_f$  = 0.33 (petroleum ether/ethyl acetate 20:1);  $^1\text{H NMR}$  (400 MHz,  $\text{CDCl}_3$ )  $\delta$  13.31 (s, 1H), 8.77 (d,  $J$  = 8.0 Hz, 1H), 8.47 (d,  $J$  = 8.8 Hz, 2H), 7.88 (d,  $J$  = 2.0 Hz, 1H), 7.49 (dt,  $J$  = 20.4 Hz,

$J = 6.8$  Hz, 2H), 7.37 (dd,  $J = 9.2$  Hz,  $J = 2.0$  Hz, 1H), 4.61 (q,  $J = 7.2$  Hz, 2H), 3.98 (s, 3H), 1.55 (t,  $J = 6.8$  Hz, 3H);  $^{13}\text{C NMR}$  (101 MHz,  $\text{CDCl}_3$ )  $\delta$  173.2, 162.2, 158.8, 128.5, 128.1, 126.8, 126.6, 126.3, 126.1, 124.4, 124.3, 122.5, 121.3, 104.8, 102.2, 62.2, 55.7, 14.5; **ESI-HRMS**:  $m/z$  Calcd for  $\text{C}_{18}\text{H}_{15}\text{O}_4^-$   $[\text{M}-\text{H}]^-$ : 295.0976, found 295.0973.

#### Ethyl 5-hydroxybenzo[*c*]phenanthrene-6-carboxylate

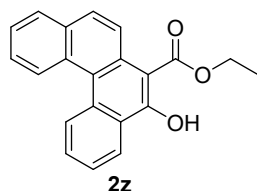

Pale yellow solid; yield 10.2 mg, 32%;  $R_f = 0.38$  (petroleum ether/ethyl acetate 50:1);  $^1\text{H NMR}$  (400 MHz,  $\text{CDCl}_3$ )  $\delta$  12.99 (s, 1H), 8.85 (dd,  $J = 16.4$  Hz,  $J = 8.4$  Hz, 2H) 8.74 (d,  $J = 9.2$  Hz, 1H), 8.63 (d,  $J = 8.0$  Hz, 1H), 7.95 (d,  $J = 7.2$  Hz, 1H), 7.85 (d,  $J = 9.2$  Hz, 1H), 7.74 (t,  $J = 7.2$  Hz, 1H), 7.64 (t,  $J = 8.0$  Hz, 1H), 7.60–7.52 (m, 2H), 4.61 (q,  $J = 6.8$  Hz, 2H), 1.54 (t,  $J = 7.2$  Hz, 3H);  $^{13}\text{C NMR}$  (101 MHz,  $\text{CDCl}_3$ )  $\delta$  172.7, 161.8, 133.3, 131.9, 130.0, 129.5, 128.5, 128.5, 128.0, 128.0, 127.6, 126.3, 126.1, 125.8, 125.4, 124.6, 124.1, 122.8, 102.8, 62.3, 14.5; **ESI-HRMS**:  $m/z$  Calcd for  $\text{C}_{21}\text{H}_{15}\text{O}_3^-$   $[\text{M}-\text{H}]^-$ : 315.1027, found 315.1027.

#### Methyl 10-hydroxyphenanthrene-9-carboxylate

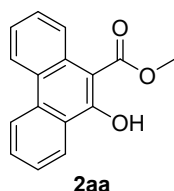

Pale yellow solid; yield 14.2 mg, 56%;  $R_f = 0.38$  (petroleum ether/ethyl acetate 50:1);  $^1\text{H NMR}$  (400 MHz,  $\text{CDCl}_3$ )  $\delta$  13.21 (s, 1H), 8.69 (d,  $J = 8.4$  Hz, 1H), 8.51 (d,  $J = 8.0$  Hz, 3H), 7.71 (t,  $J = 7.2$  Hz, 1H), 7.59 (t,  $J = 7.6$  Hz, 1H), 7.53 (t,  $J = 7.6$  Hz, 1H), 7.44 (t,  $J = 7.2$  Hz, 1H), 4.07 (s, 3H);  $^{13}\text{C NMR}$  (101 MHz,  $\text{CDCl}_3$ )  $\delta$  173.4, 162.9, 133.8, 130.6, 129.4, 127.7, 126.9, 126.2, 126.1, 125.3, 125.1, 124.4, 122.9, 122.5, 101.6, 52.6; **ESI-HRMS**:  $m/z$  Calcd for  $\text{C}_{16}\text{H}_{11}\text{O}_3^-$   $[\text{M}-\text{H}]^-$ : 251.0714, found 251.0712.

#### Benzyl 10-hydroxyphenanthrene-9-carboxylate

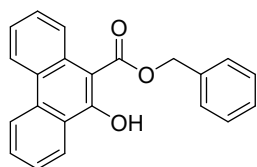

**2ab**

White solid; yield 26.9 mg, 82%;  $R_f = 0.38$  (petroleum ether/ethyl acetate 50:1);  $^1\text{H NMR}$  (400 MHz,  $\text{CDCl}_3$ )  $\delta$  13.19 (s, 1H), 8.74 (d,  $J = 8.4$  Hz, 1H), 8.49 (t,  $J = 7.2$  Hz, 3H), 7.69 (t,  $J = 7.2$  Hz, 1H), 7.57 (t,  $J = 7.2$  Hz, 1H), 7.50–7.32 (m, 7H), 5.53 (s, 2H);  $^{13}\text{C NMR}$  (101 MHz,  $\text{CDCl}_3$ )  $\delta$  172.7, 163.0, 135.4, 133.8, 130.6, 129.5, 128.9, 128.6, 128.5, 127.7, 126.9, 126.2 ( $\times 2$ ), 125.3, 125.1, 124.3, 122.9, 122.5, 101.5, 67.7; **ESI-HRMS**:  $m/z$  Calcd for  $\text{C}_{22}\text{H}_{15}\text{O}_3^-$   $[\text{M}-\text{H}]^-$ : 327.1027, found 327.1026.

**(10-hydroxyphenanthren-9-yl)(phenyl)methanone**

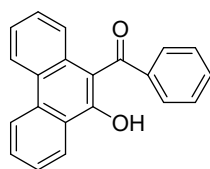

**2ac**

Pale yellow solid; yield 13.5 mg, 45%;  $R_f = 0.47$  (petroleum ether/ethyl acetate 20:1);  $^1\text{H NMR}$  (400 MHz,  $\text{CDCl}_3$ )  $\delta$  12.74 (s, 1H), 8.61 (t,  $J = 9.2$  Hz, 2H), 8.54 (d,  $J = 8.0$  Hz, 1H), 7.82 (t,  $J = 7.2$  Hz, 1H), 7.69 (t,  $J = 7.2$  Hz, 1H), 7.63 (d,  $J = 7.2$  Hz, 2H), 7.54 (t,  $J = 7.2$  Hz, 1H), 7.40–7.33 (m, 4H), 7.17 (t,  $J = 7.2$  Hz, 1H);  $^{13}\text{C NMR}$  (101 MHz,  $\text{CDCl}_3$ )  $\delta$  200.3, 160.8, 140.5, 134.1, 132.6, 130.7, 130.4, 129.6, 128.6, 127.8, 127.2, 126.3, 126.0, 125.3, 125.2, 124.5, 123.0, 122.7, 111.1; **ESI-HRMS**:  $m/z$  Calcd for  $\text{C}_{21}\text{H}_{13}\text{O}_2^-$   $[\text{M}-\text{H}]^-$ : 297.0921, found 297.0917.

**10-hydroxy-N-phenylphenanthrene-9-carboxamide**

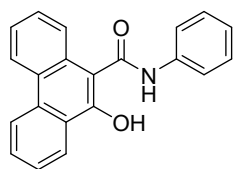

**2ad**

White solid; yield 7.9 mg, 25%;  $R_f = 0.58$  (petroleum ether/ethyl acetate 6:1);  $^1\text{H NMR}$  (400 MHz, DMSO)  $\delta$  10.57 (s, 1H), 10.10 (s, 1H), 8.86 (d,  $J = 7.6$  Hz, 1H), 8.80 (d,  $J = 7.6$  Hz, 1H), 8.41 (d,  $J = 7.6$  Hz, 1H), 7.85 (d,  $J = 7.6$  Hz, 2H), 7.79–7.73 (m, 3H), 7.60–7.54 (m, 2H), 7.38 (t,  $J = 6.4$  Hz, 2H), 7.12 (t,  $J = 6.8$  Hz, 1H);  $^{13}\text{C NMR}$  (101 MHz, DMSO)  $\delta$  166.0, 147.2, 139.6, 131.0, 130.0, 128.7, 127.9, 127.4, 126.8, 126.1, 125.5, 124.3,

124.2, 123.5, 123.2, 123.0, 119.6, 116.7; **ESI-HRMS**: m/z Calcd for  $C_{21}H_{14}NO_2^-$  [M-H]<sup>-</sup>: 312.1030, found 312.1029.

#### 10-hydroxyphenanthrene-9-carbonitrile

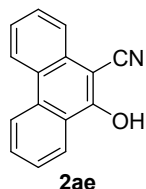

Cream solid; yield 17.5 mg, 80%;  $R_f$  = 0.24 (petroleum ether/ethyl acetate 10:1); **<sup>1</sup>H NMR** (400 MHz, DMSO)  $\delta$  11.84 (s, 1H), 8.85 (d,  $J$  = 8.4 Hz, 1H), 8.78 (d,  $J$  = 8.0 Hz, 1H), 8.44 (d,  $J$  = 8.0 Hz, 1H), 7.96 (d,  $J$  = 8.0 Hz, 1H), 7.88 (t,  $J$  = 7.2 Hz, 1H), 7.79–7.71 (m, 2H), 7.61 (t,  $J$  = 7.2 Hz, 1H); **<sup>13</sup>C NMR** (101 MHz, DMSO)  $\delta$  158.8, 132.5, 130.4, 129.4, 128.7, 127.5, 125.6, 125.3, 124.8, 123.7, 123.6, 123.5, 123.5, 116.5, 90.2; **ESI-HRMS**: m/z Calcd for  $C_{15}H_8NO^-$  [M-H]<sup>-</sup>: 218.0611, found 218.0595.

#### 10-(methylsulfonyl)phenanthren-9-ol

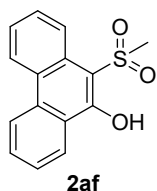

Pale yellow solid; yield 10.4 mg, 38%;  $R_f$  = 0.36 (petroleum ether/ethyl acetate 10:1); **<sup>1</sup>H NMR** (400 MHz,  $CDCl_3$ )  $\delta$  11.69 (s, 1H), 8.63–8.52 (m, 4H), 7.81 (t,  $J$  = 7.2 Hz, 1H), 7.66 (q,  $J$  = 7.2 Hz, 2H), 7.56 (t,  $J$  = 6.8 Hz, 1H), 3.35 (s, 3H); **<sup>13</sup>C NMR** (101 MHz,  $CDCl_3$ )  $\delta$  156.4, 133.8, 131.1, 128.6, 127.6, 127.2, 126.5, 125.4, 125.3, 123.5, 123.4, 122.6, 108.7, 45.0; **ESI-HRMS**: m/z Calcd for  $C_{15}H_{11}O_3S^-$  [M-H]<sup>-</sup>: 271.0434, found 271.0421.

#### Ethyl 6-hydroxybenzo[*h*]quinoline-5-carboxylate

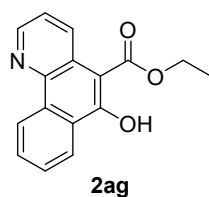

White solid; yield 2.9 mg, 11%;  $R_f = 0.16$  (petroleum ether/ethyl acetate 50:1);  $^1\text{H NMR}$  (400 MHz,  $\text{CDCl}_3$ )  $\delta$  13.54 (s, 1H), 9.25 (d,  $J = 7.2$  Hz, 1H), 9.13 (d,  $J = 8.4$  Hz, 1H), 8.81 (s, 1H), 8.54 (d,  $J = 8.0$  Hz, 1H), 7.87 (t,  $J = 6.4$  Hz, 1H), 7.75 (t,  $J = 7.2$  Hz, 1H), 7.51–7.49 (m, 1H), 4.63 (q,  $J = 7.2$  Hz, 2H), 1.57 (t,  $J = 6.8$  Hz, 3H);  $^{13}\text{C NMR}$  (101 MHz,  $\text{CDCl}_3$ )  $\delta$  172.8, 163.8, 146.1, 142.5, 135.0, 133.8, 131.1, 128.7, 126.8, 124.8, 124.4, 122.5, 100.0, 62.4, 14.5; **ESI-HRMS**:  $m/z$  Calcd for  $\text{C}_{16}\text{H}_{12}\text{NO}_3^-$   $[\text{M}-\text{H}]^-$ : 266.0823, found 266.0820.

#### Ethyl 5-hydroxy-7-methyl-7H-benzo[*c*]carbazole-6-carboxylate

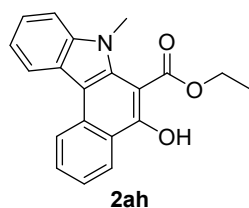

Pale yellow solid; yield 6.4 mg, 20%;  $R_f = 0.23$  (petroleum ether/ethyl acetate 50:1);  $^1\text{H NMR}$  (400 MHz,  $\text{CDCl}_3$ )  $\delta$  11.72 (s, 1H), 8.66 (d,  $J = 8.0$  Hz, 1H), 8.51 (d,  $J = 8.0$  Hz, 1H), 8.43 (d,  $J = 7.6$  Hz, 1H), 7.77 (t,  $J = 6.4$  Hz, 1H), 7.51 (d,  $J = 7.6$  Hz, 1H), 7.45 (q,  $J = 7.2$  Hz, 2H), 7.37 (t,  $J = 7.2$  Hz, 1H), 4.56 (q,  $J = 7.2$  Hz, 2H), 3.85 (s, 3H), 1.47 (t,  $J = 7.2$  Hz, 3H);  $^{13}\text{C NMR}$  (101 MHz,  $\text{CDCl}_3$ )  $\delta$  170.4, 160.7, 141.8, 136.9, 133.1, 130.7, 125.4, 123.9, 123.4, 123.1, 123.0, 120.9, 120.9, 120.8, 110.1, 110.0, 97.0, 62.1, 35.8, 14.5; **ESI-HRMS**:  $m/z$  Calcd for  $\text{C}_{20}\text{H}_{16}\text{NO}_3^-$   $[\text{M}-\text{H}]^-$ : 318.1136, found 318.1130.

#### Ethyl 5-hydroxynaphtho[1,2-*b*]furan-4-carboxylate

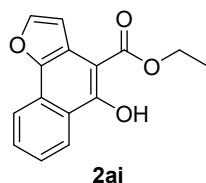

Pale yellow solid; yield 4.4 mg, 17%;  $R_f = 0.39$  (petroleum ether/ethyl acetate 50:1);  $^1\text{H NMR}$  (400 MHz,  $\text{CDCl}_3$ )  $\delta$  12.36 (s, 1H), 8.47 (d,  $J = 8.4$  Hz, 1H), 8.21 (d,  $J = 8.4$  Hz, 1H), 7.73–7.69 (m, 2H), 7.53 (t,  $J = 7.6$  Hz, 1H), 7.23 (s, 1H), 4.54 (q,  $J = 6.8$  Hz, 2H), 1.54 (t,  $J = 7.2$  Hz, 3H);  $^{13}\text{C NMR}$  (101 MHz,  $\text{CDCl}_3$ )  $\delta$  171.8, 159.5, 144.6, 144.4, 130.2, 125.2, 125.1, 125.0, 123.2, 120.0, 119.9, 109.5, 99.5, 61.7, 14.5; **ESI-HRMS**:  $m/z$  Calcd for  $\text{C}_{15}\text{H}_{11}\text{O}_4^-$   $[\text{M}-\text{H}]^-$ : 255.0663, found 255.0660.



**Ethyl 5-hydroxynaphtho[1,2-*b*]thiophene-4-carboxylate**

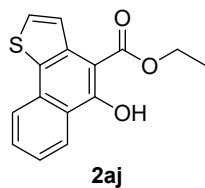

Pale yellow solid; yield 14.5 mg, 53%;  $R_f$  = 0.67 (petroleum ether/ethyl acetate 10:1);  $^1\text{H NMR}$  (400 MHz,  $\text{CDCl}_3$ )  $\delta$  12.90 (s, 1H), 8.43 (d,  $J$  = 7.6 Hz, 1H), 7.97–7.95 (m, 2H), 7.62 (t,  $J$  = 6.4 Hz, 1H), 7.51–7.43 (m, 2H), 4.52 (q,  $J$  = 6.0 Hz, 2H), 1.51 (t,  $J$  = 6.8 Hz, 3H);  $^{13}\text{C NMR}$  (101 MHz,  $\text{CDCl}_3$ )  $\delta$  172.0, 161.9, 133.7, 131.8, 130.4, 130.3, 126.6, 125.7, 125.4, 123.5, 123.4, 101.8, 61.9, 14.4; **ESI-HRMS**:  $m/z$  Calcd for  $\text{C}_{15}\text{H}_{11}\text{O}_3\text{S}^-$   $[\text{M}-\text{H}]^-$ : 271.0434, found 271.0421.

## 7. Copies of $^1\text{H}$ NMR, $^{13}\text{C}$ NMR and $^{19}\text{F}$ NMR

**1t** – <sup>1</sup>H NMR (400 MHz, CDCl<sub>3</sub>)

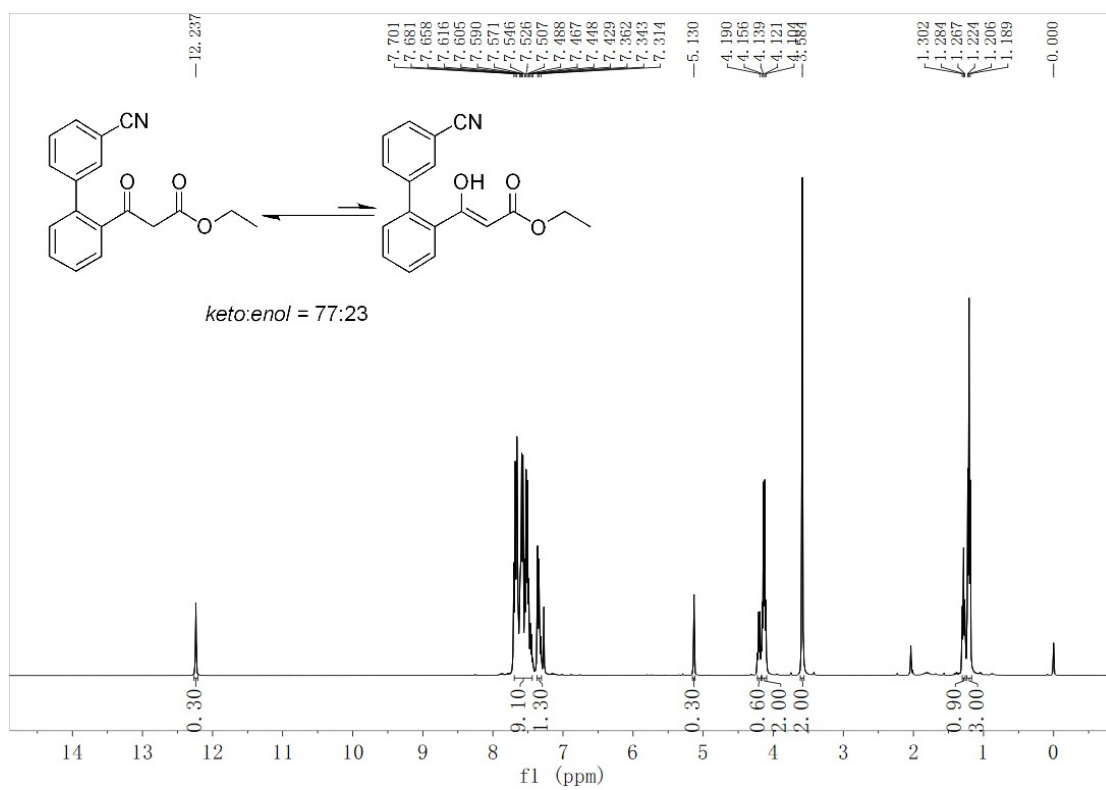

**1t** – <sup>13</sup>C NMR (101 MHz, CDCl<sub>3</sub>)

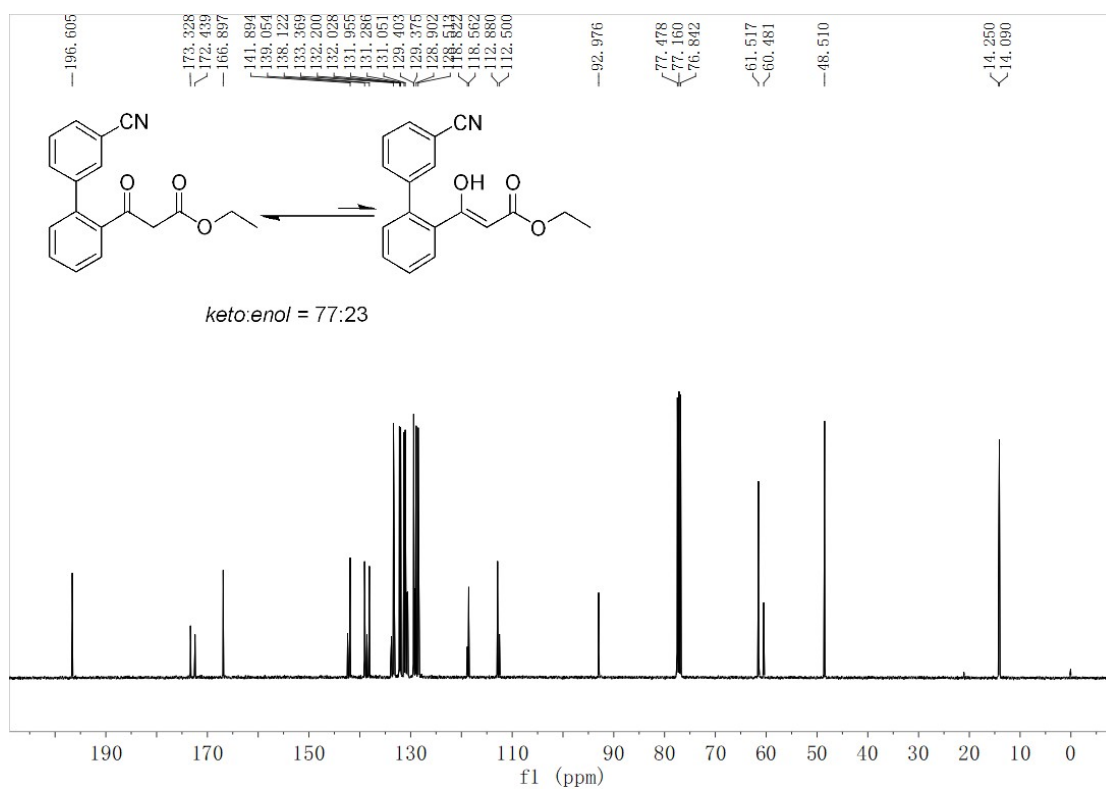

**1u** – <sup>1</sup>H NMR (400 MHz, CDCl<sub>3</sub>)

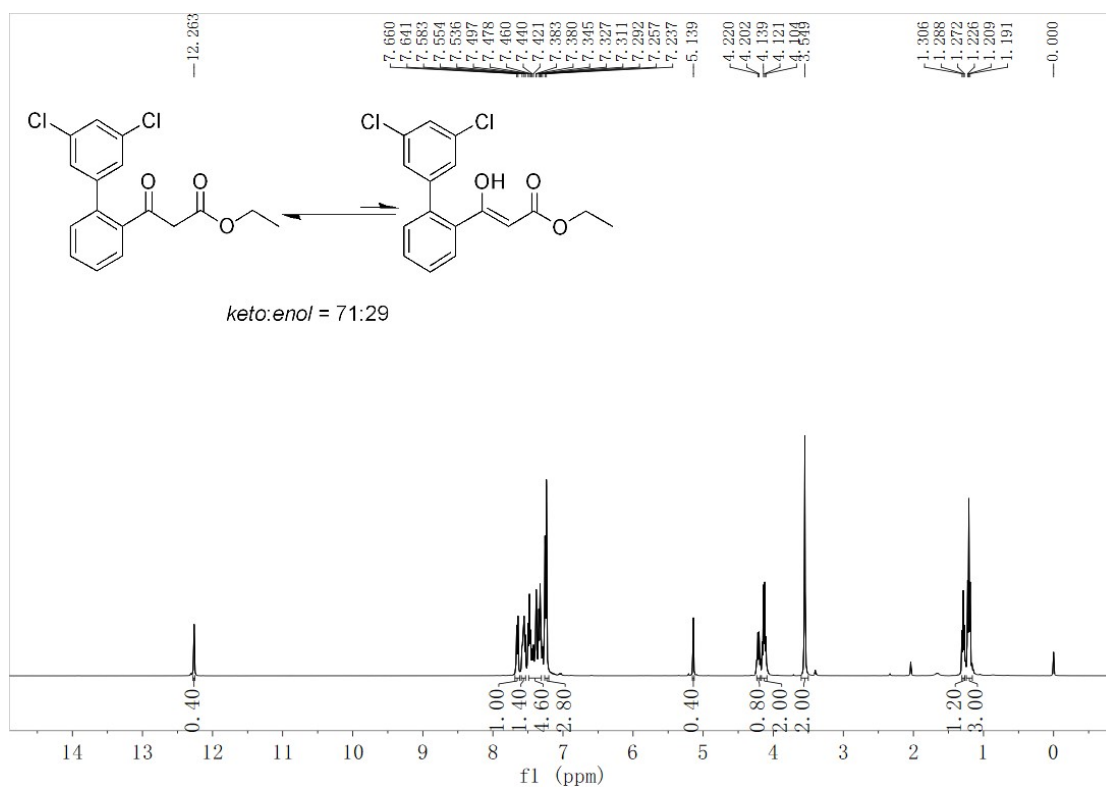

**1u** – <sup>13</sup>C NMR (101 MHz, CDCl<sub>3</sub>)

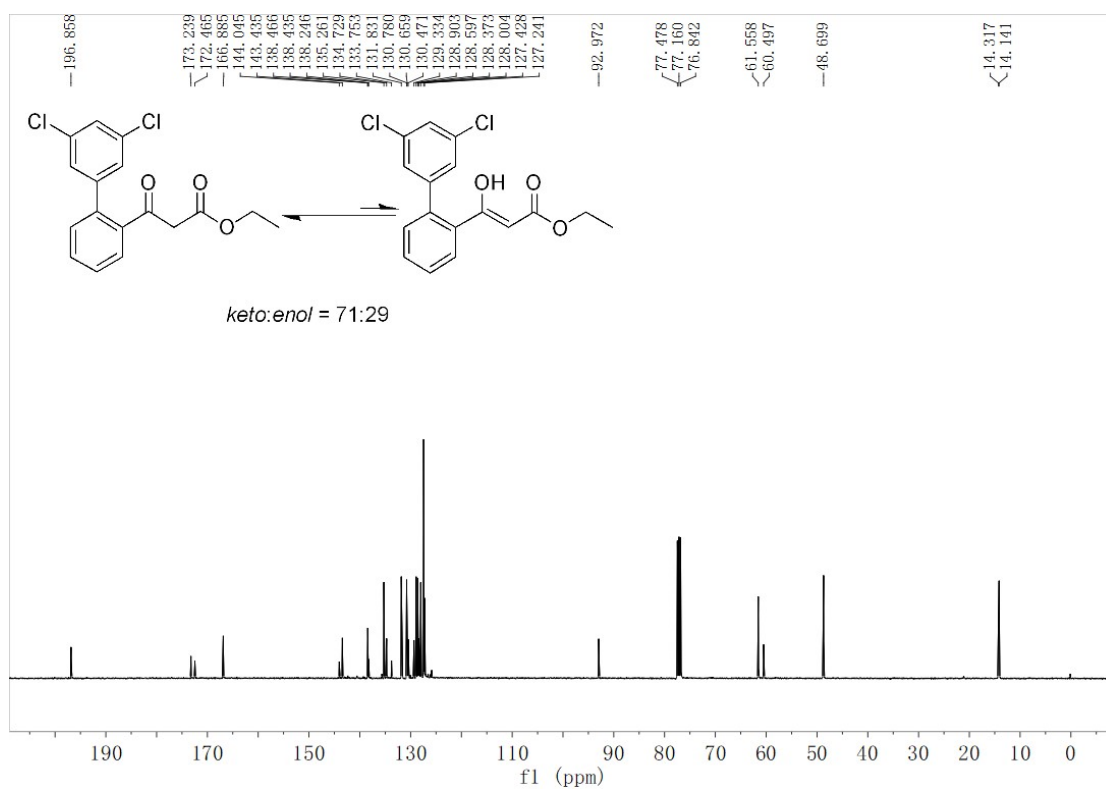

**1ag** – <sup>1</sup>H NMR (400 MHz, CDCl<sub>3</sub>)

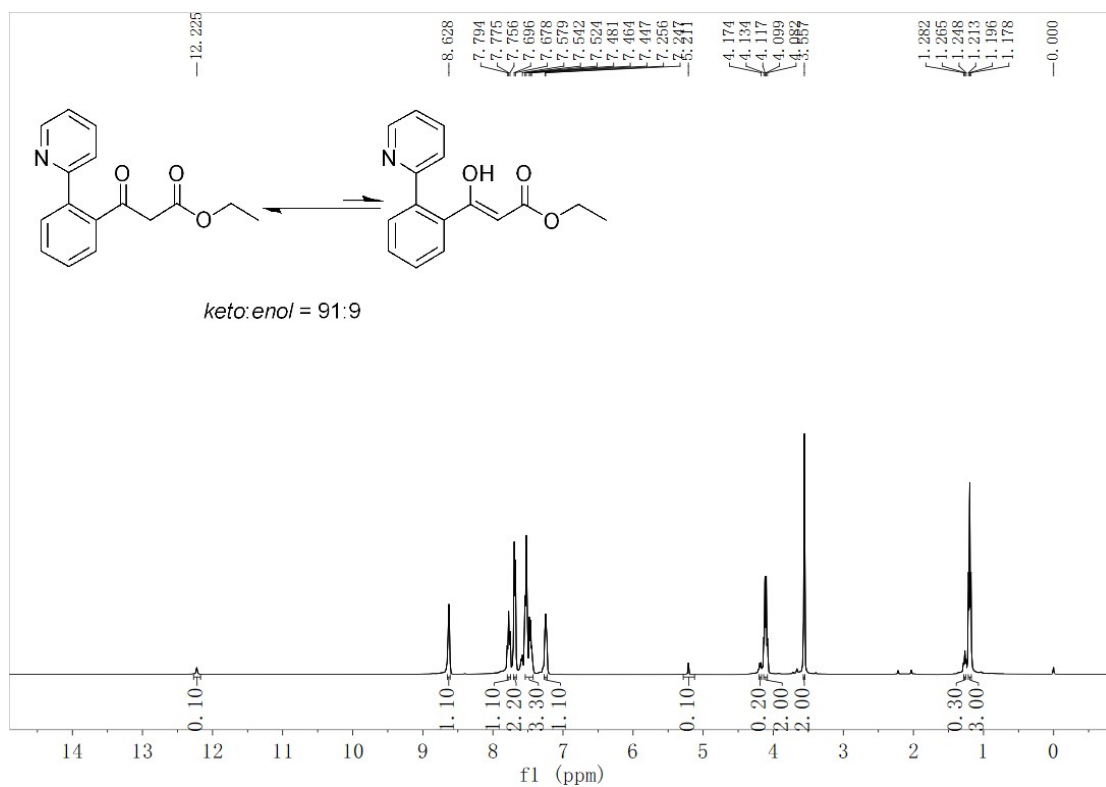

**1ag** – <sup>13</sup>C NMR (101 MHz, CDCl<sub>3</sub>)

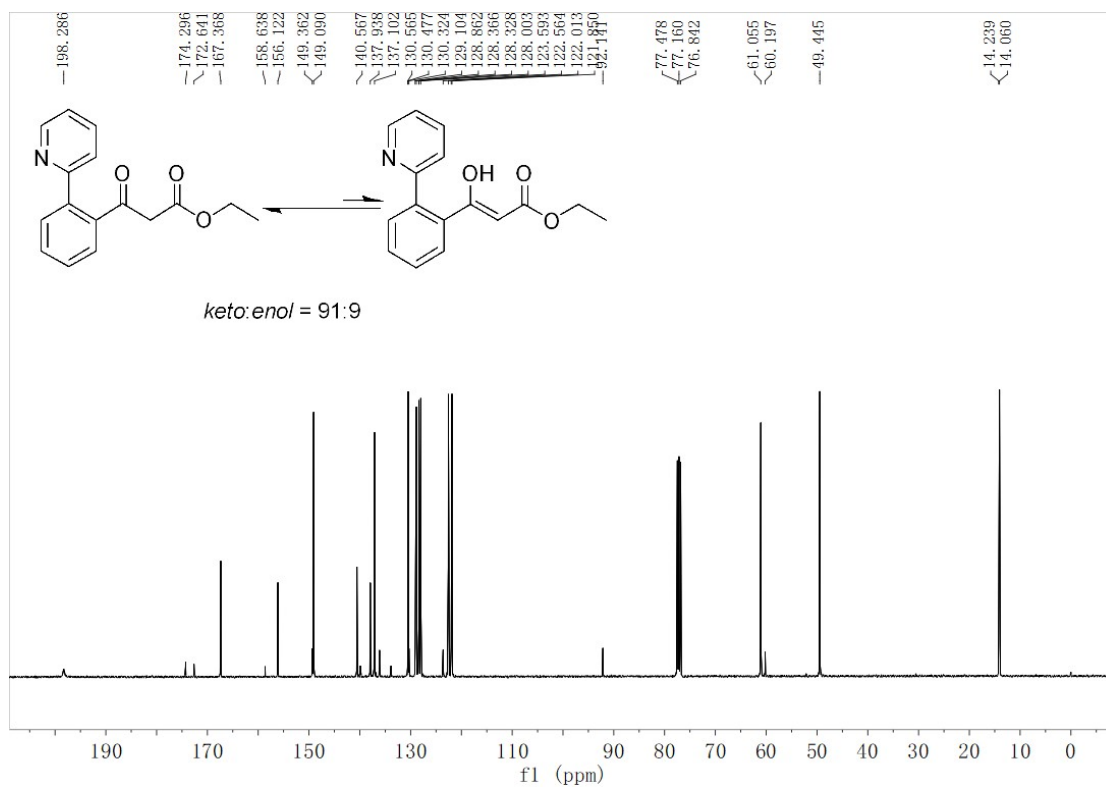

**1ah** – <sup>1</sup>H NMR (400 MHz, CDCl<sub>3</sub>)

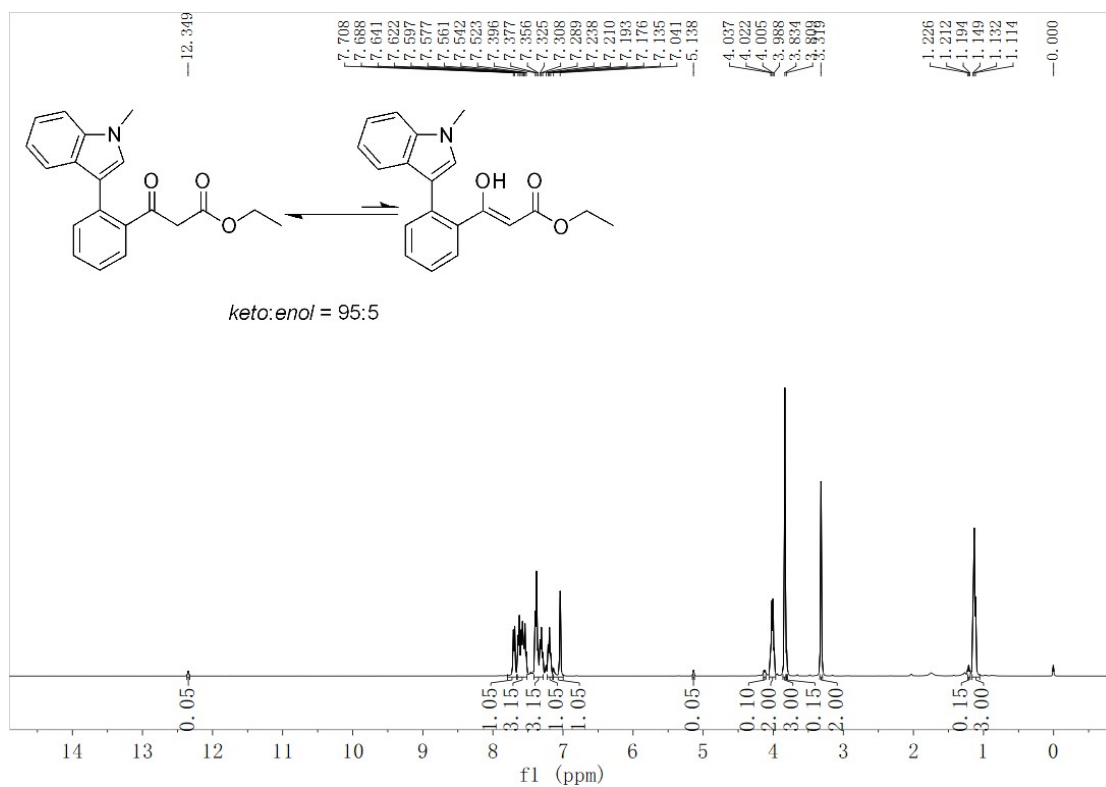

**1ah** – <sup>13</sup>C NMR (101 MHz, CDCl<sub>3</sub>)

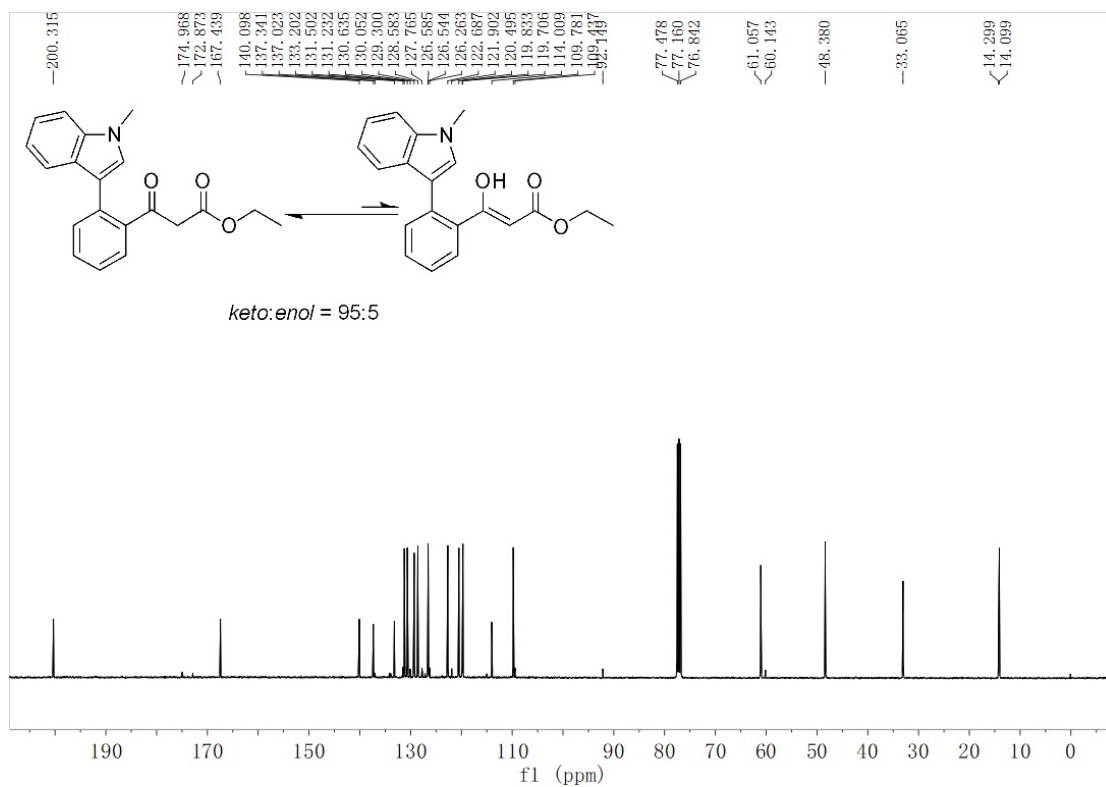

**1ai** – <sup>1</sup>H NMR (400 MHz, CDCl<sub>3</sub>)

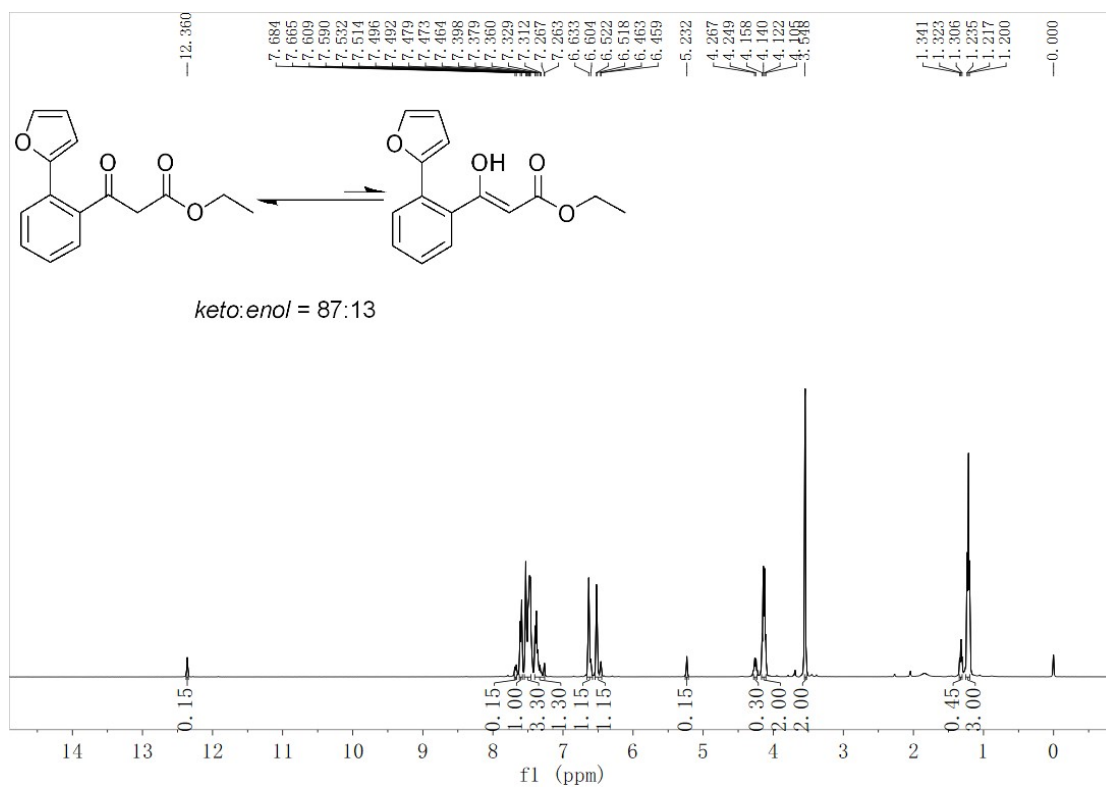

**1ai** – <sup>13</sup>C NMR (101 MHz, CDCl<sub>3</sub>)

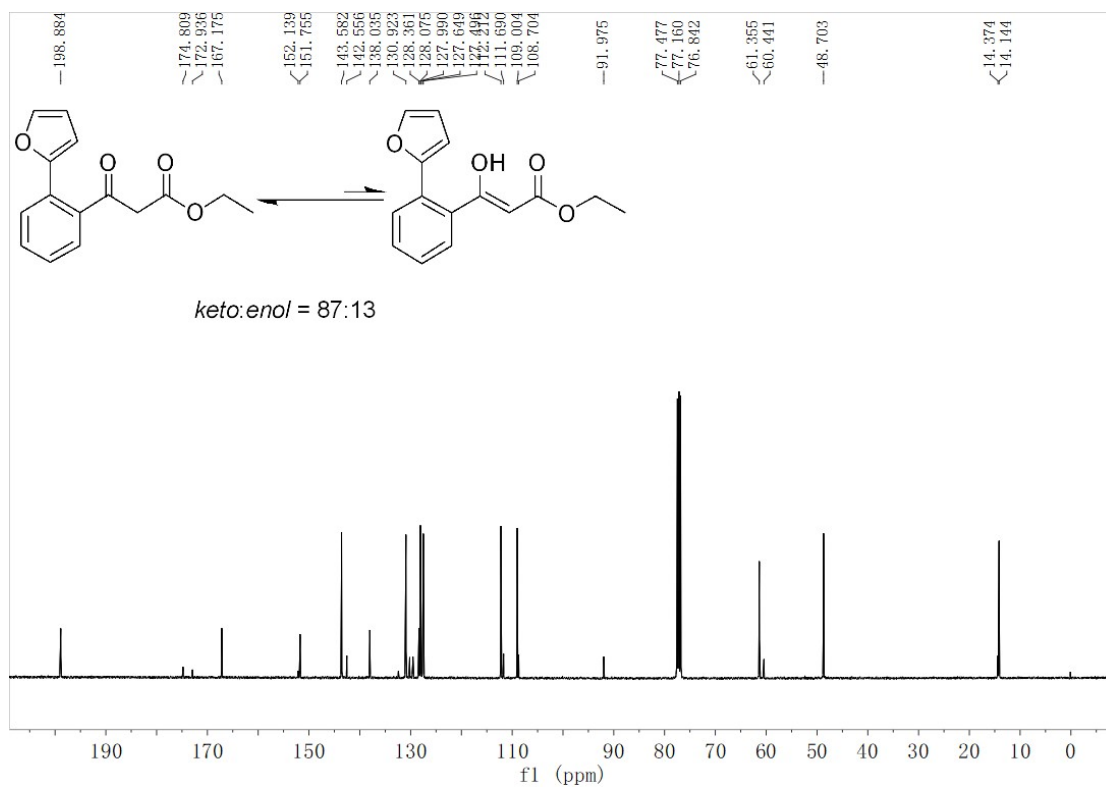

**1aj** – <sup>1</sup>H NMR (400 MHz, CDCl<sub>3</sub>)

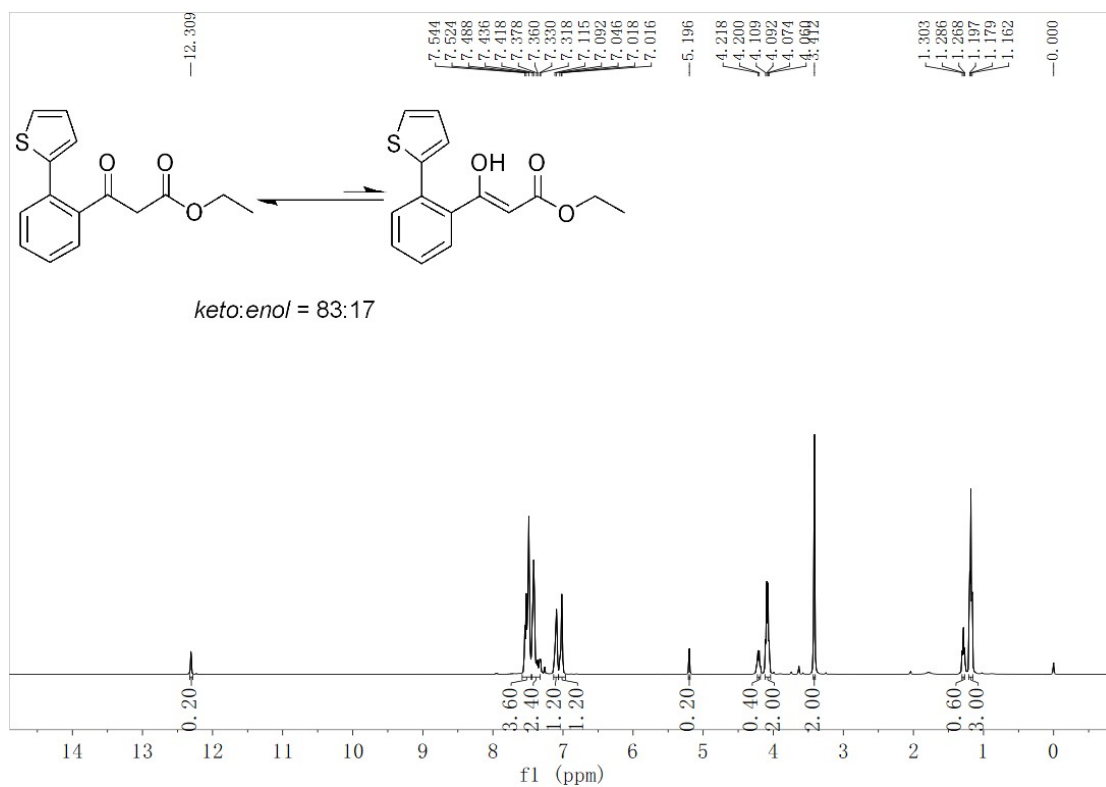

**1aj** – <sup>13</sup>C NMR (101 MHz, CDCl<sub>3</sub>)

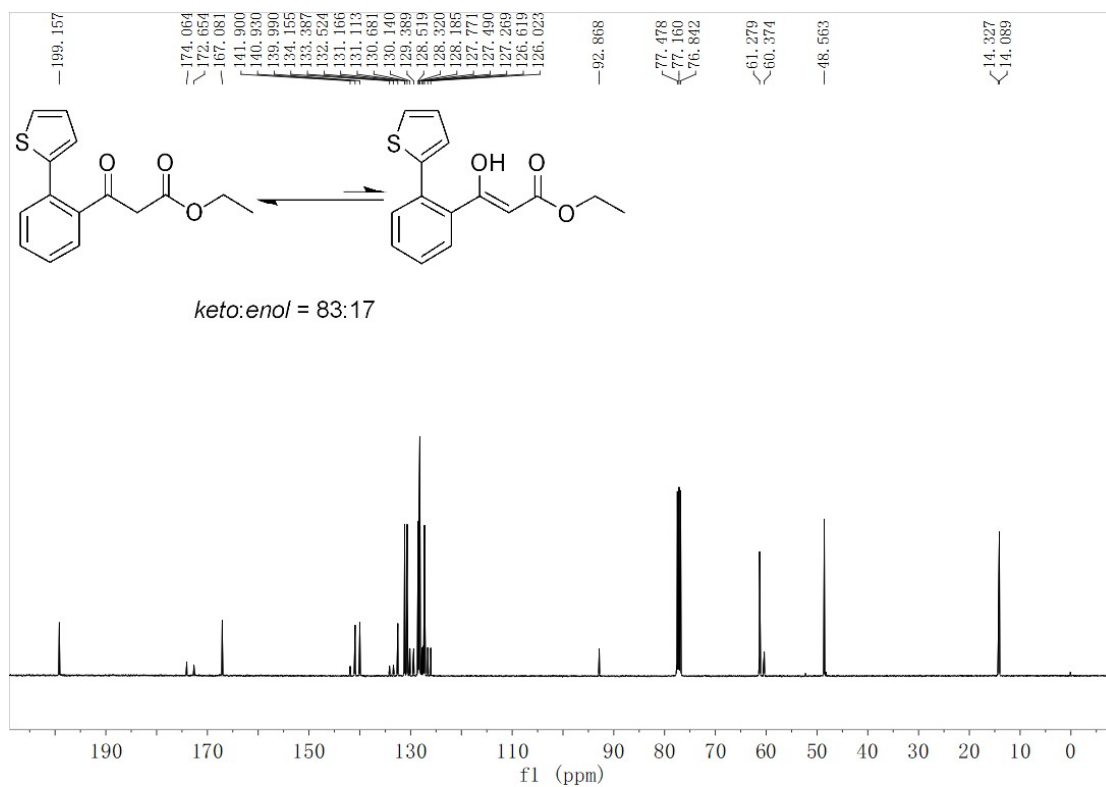



[I]-1a – <sup>1</sup>H NMR (400 MHz, CDCl<sub>3</sub>)

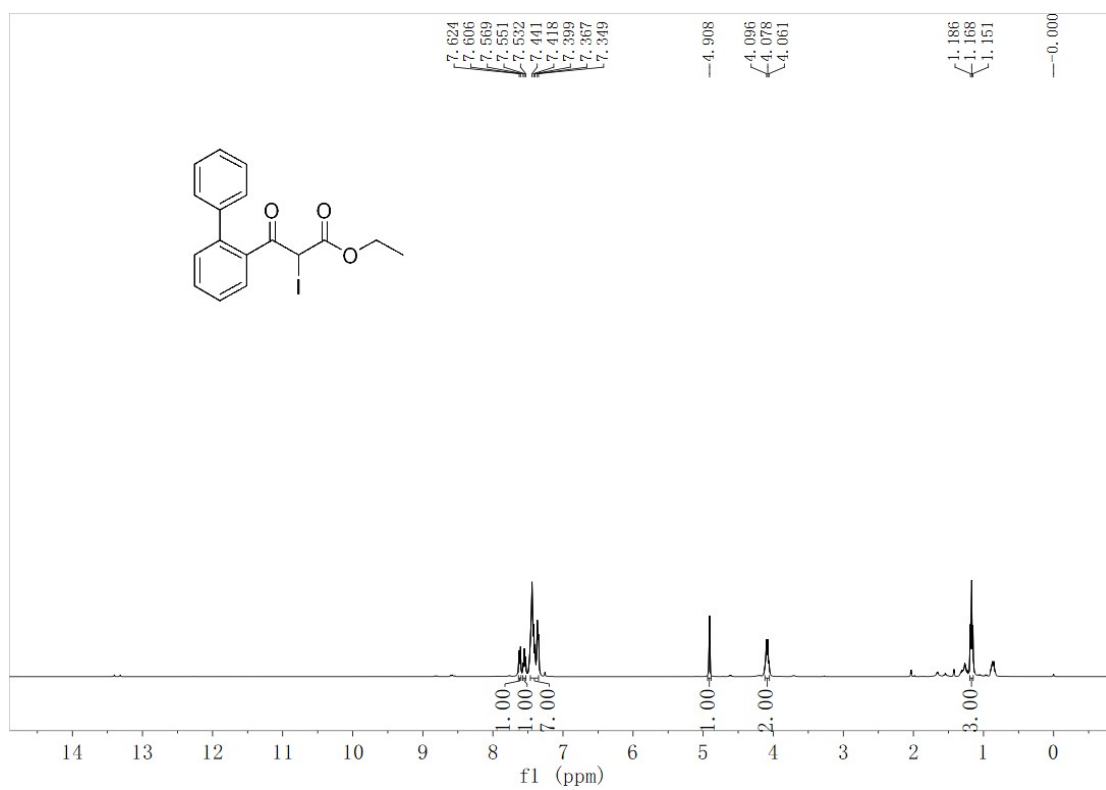

[I]-1a – <sup>13</sup>C NMR (101 MHz, CDCl<sub>3</sub>)

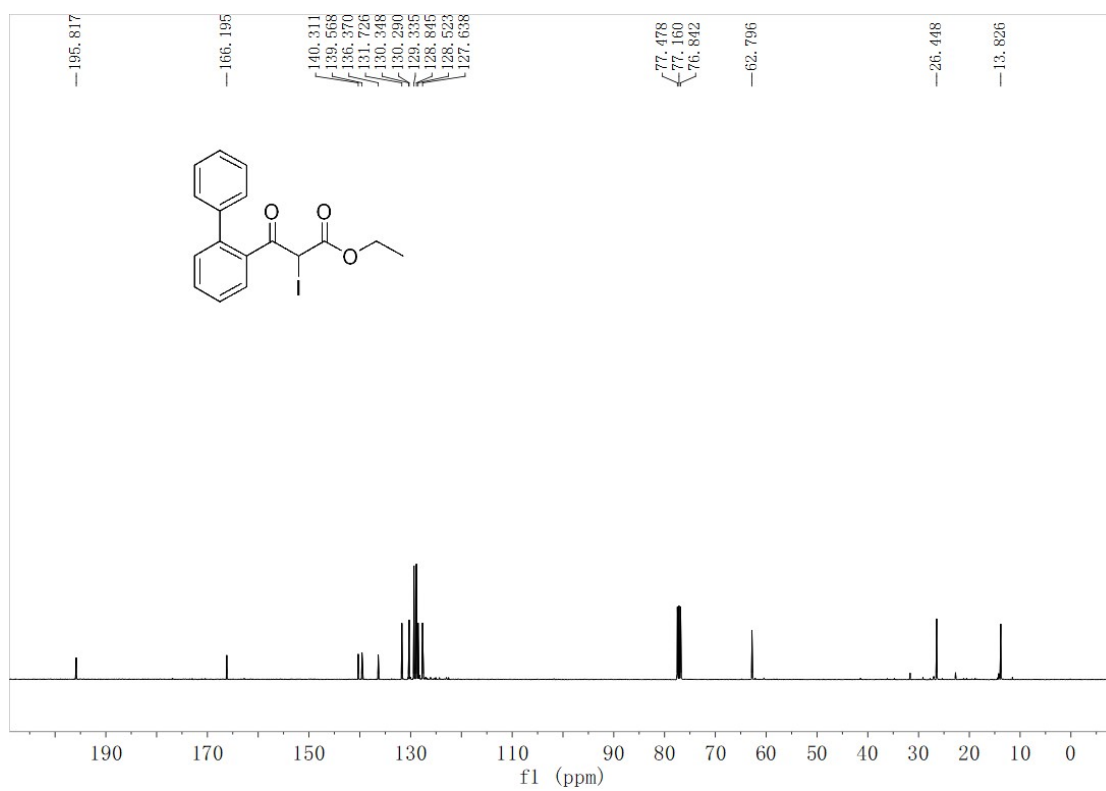

D<sub>5</sub>-1a – <sup>1</sup>H NMR (400 MHz, CDCl<sub>3</sub>)

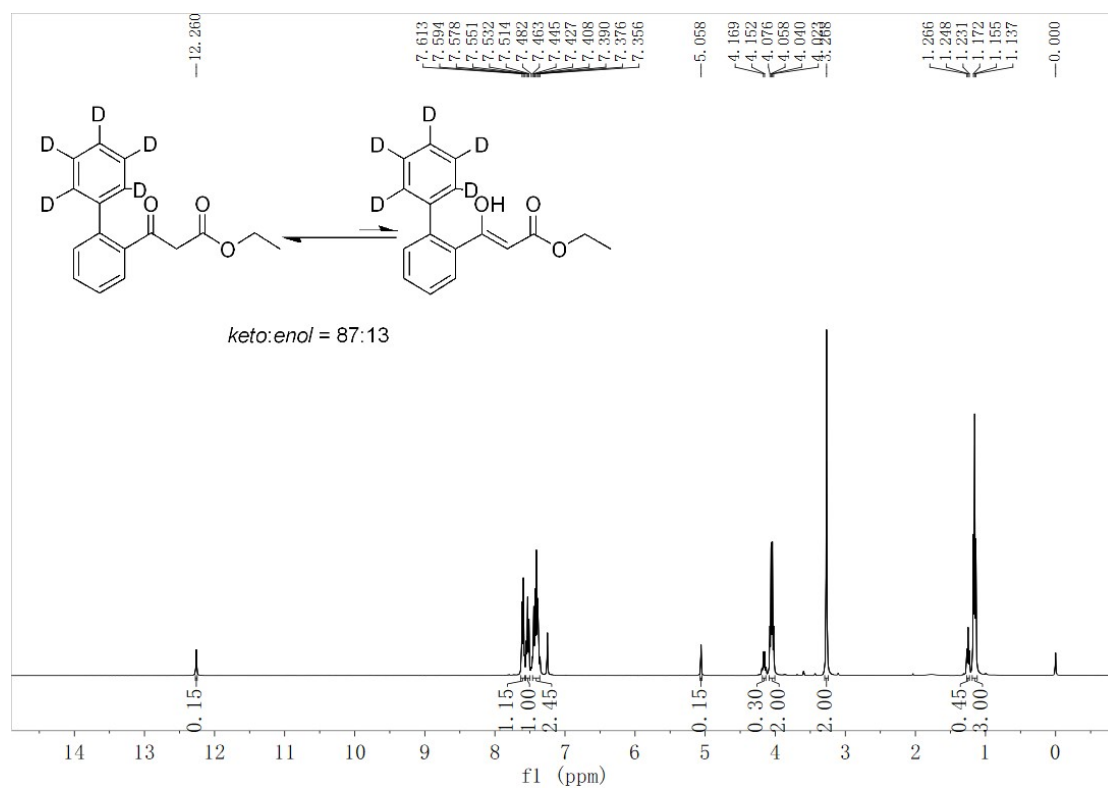

D<sub>5</sub>-1a – <sup>13</sup>C NMR (101 MHz, CDCl<sub>3</sub>)

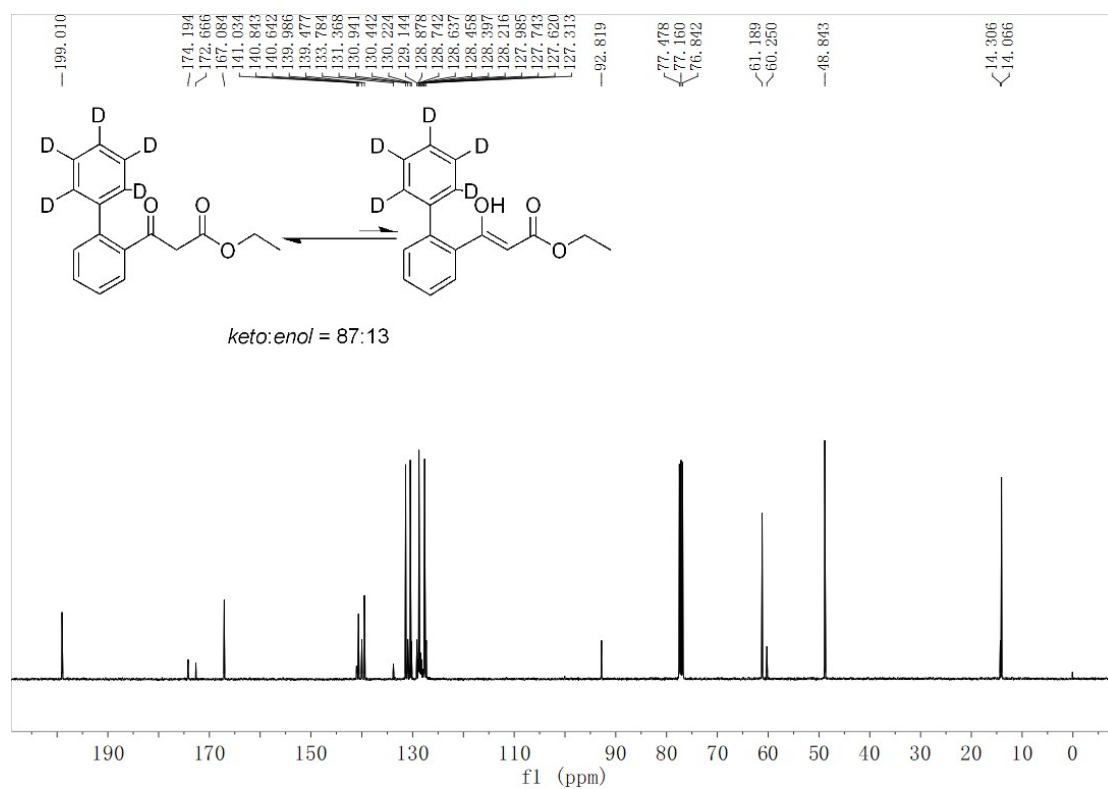

**2a** – <sup>1</sup>H NMR (400 MHz, CDCl<sub>3</sub>)

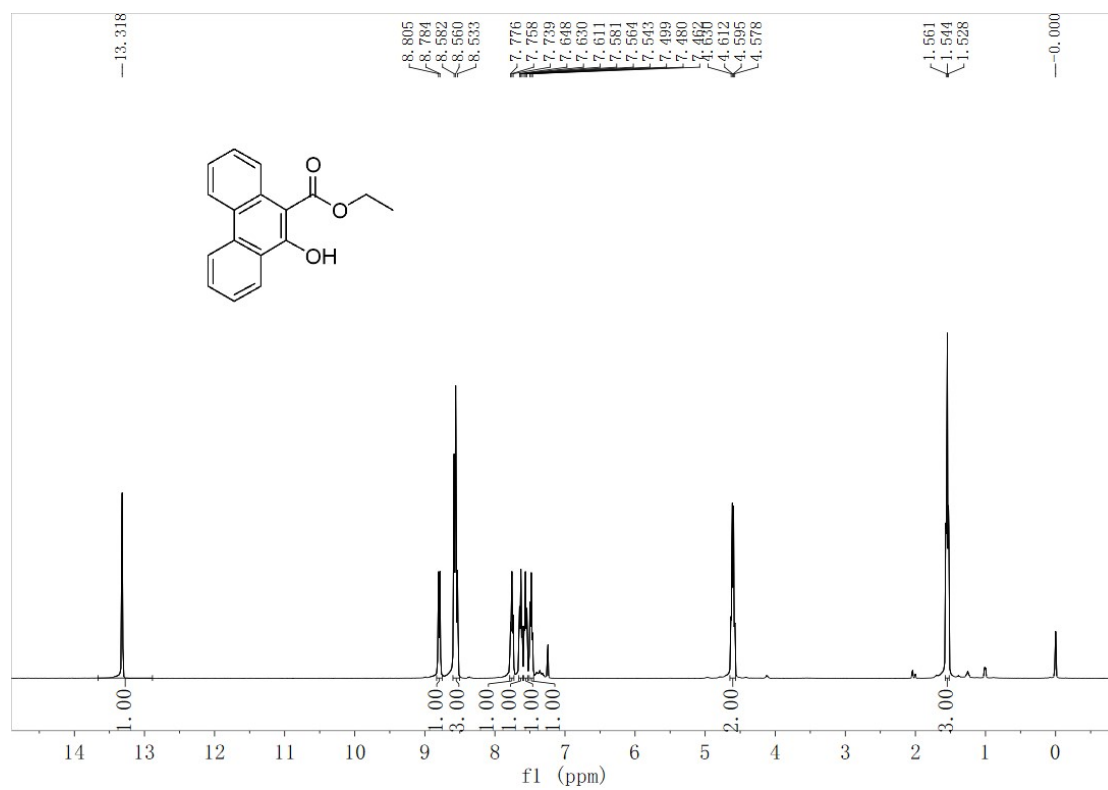

**2a** – <sup>13</sup>C NMR (101 MHz, CDCl<sub>3</sub>)

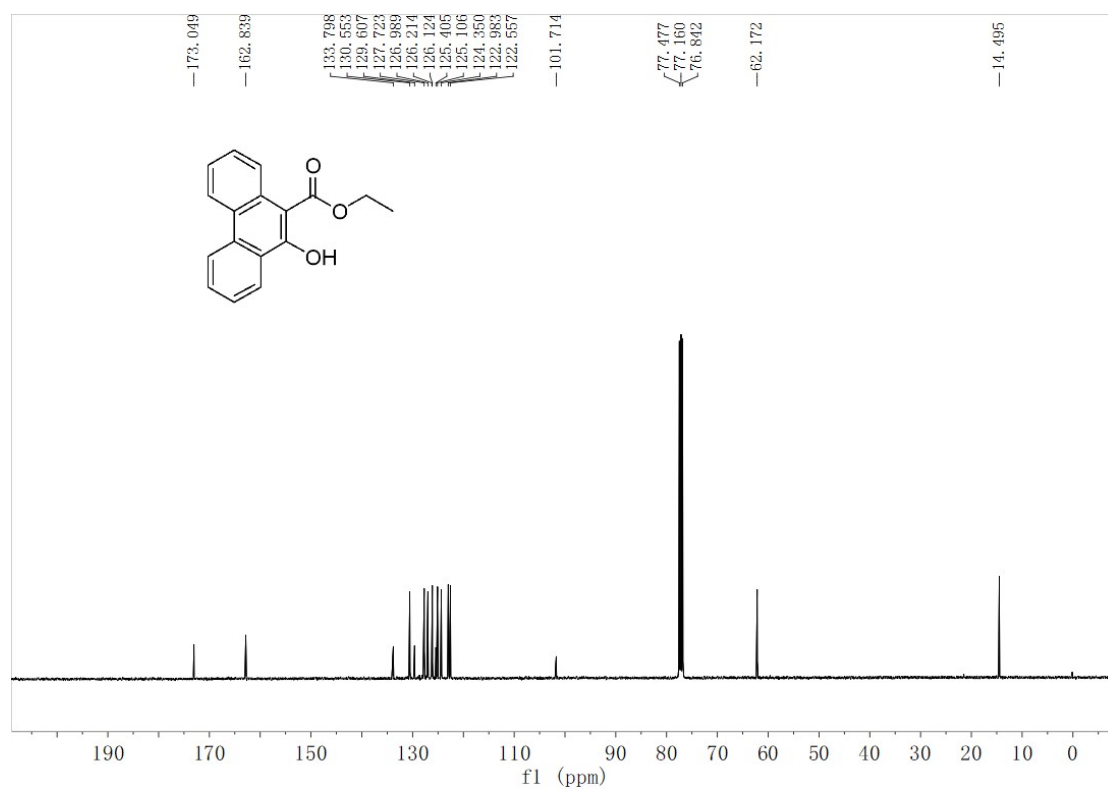

**2b** – <sup>1</sup>H NMR (400 MHz, CDCl<sub>3</sub>)

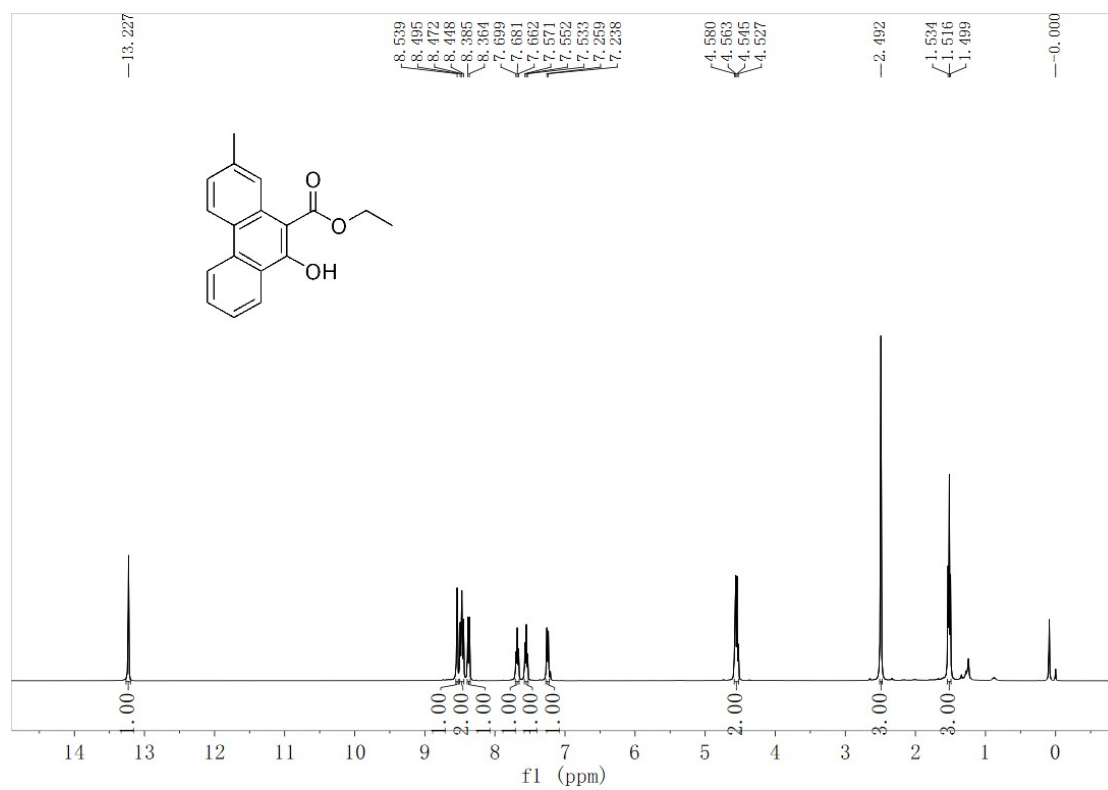

**2b** – <sup>13</sup>C NMR (101 MHz, CDCl<sub>3</sub>)

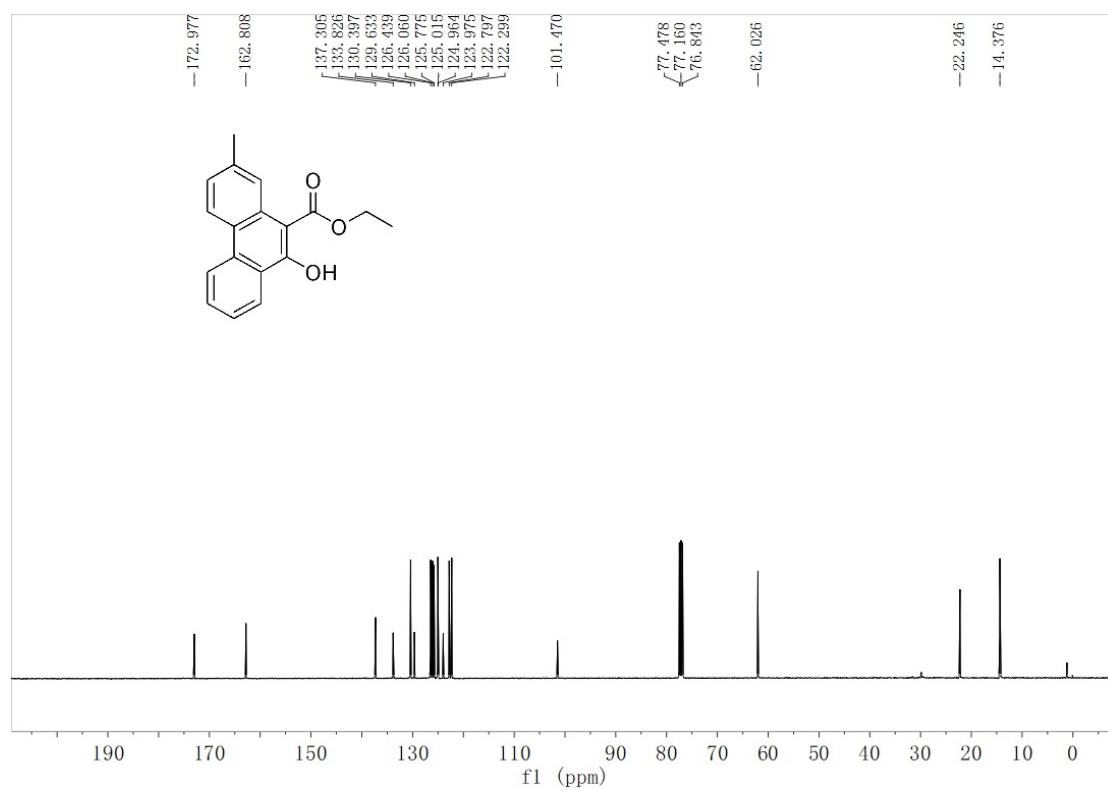

**2c** – <sup>1</sup>H NMR (400 MHz, CDCl<sub>3</sub>)

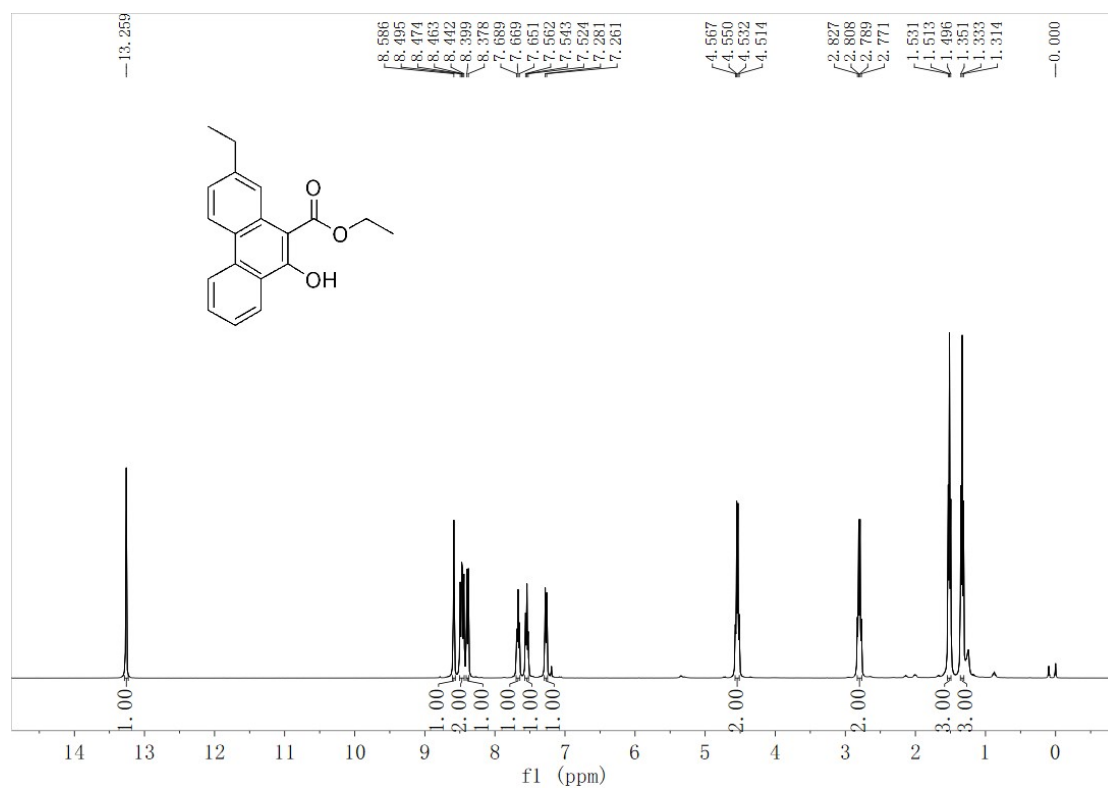

**2c** – <sup>13</sup>C NMR (101 MHz, CDCl<sub>3</sub>)

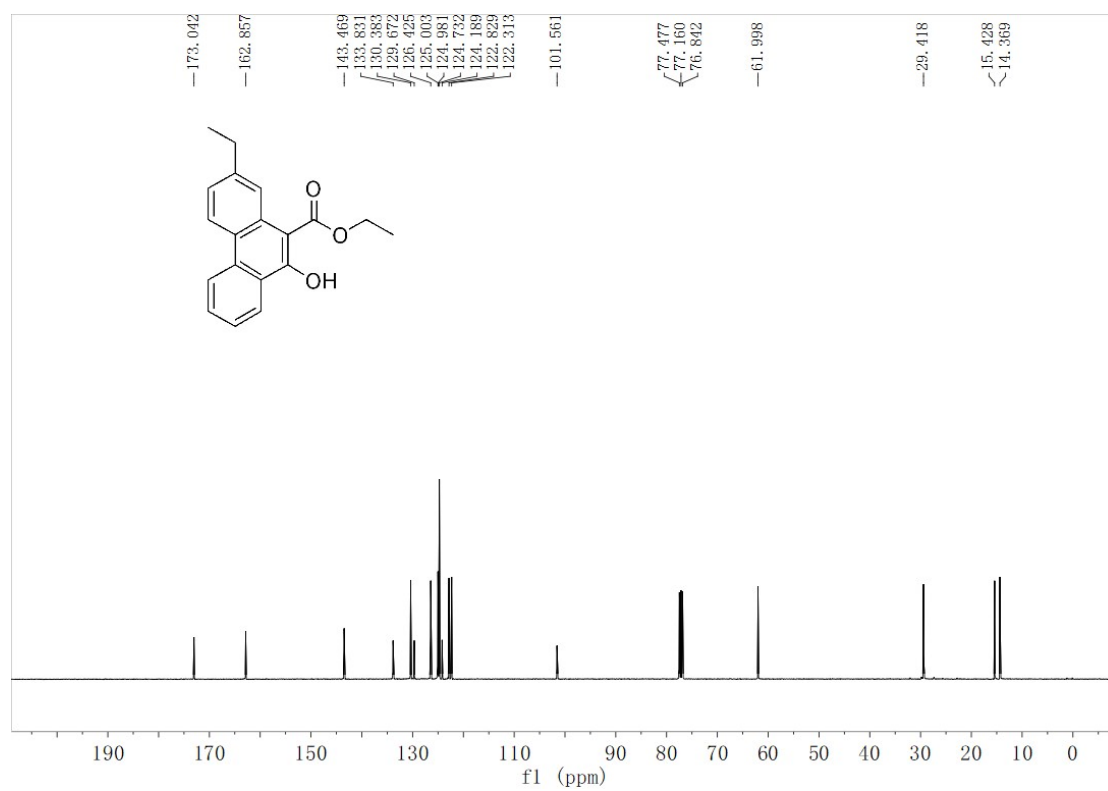

**2d** – <sup>1</sup>H NMR (400 MHz, CDCl<sub>3</sub>)

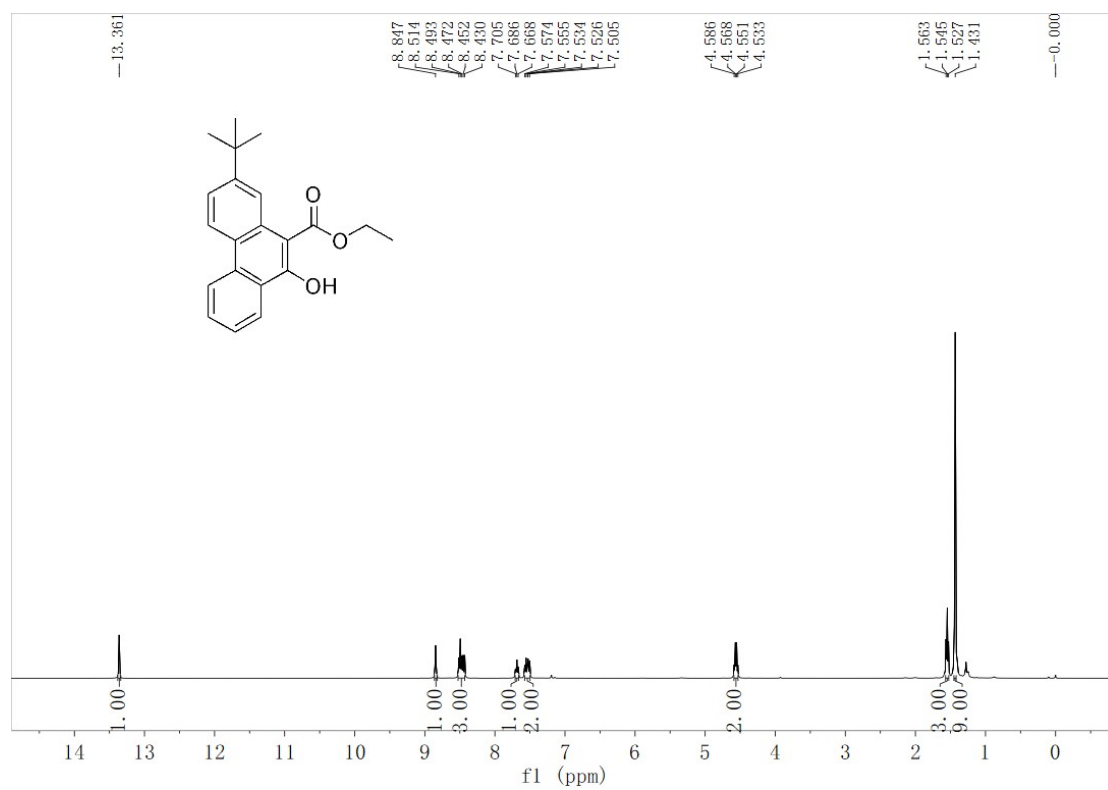

**2d** – <sup>13</sup>C NMR (101 MHz, CDCl<sub>3</sub>)

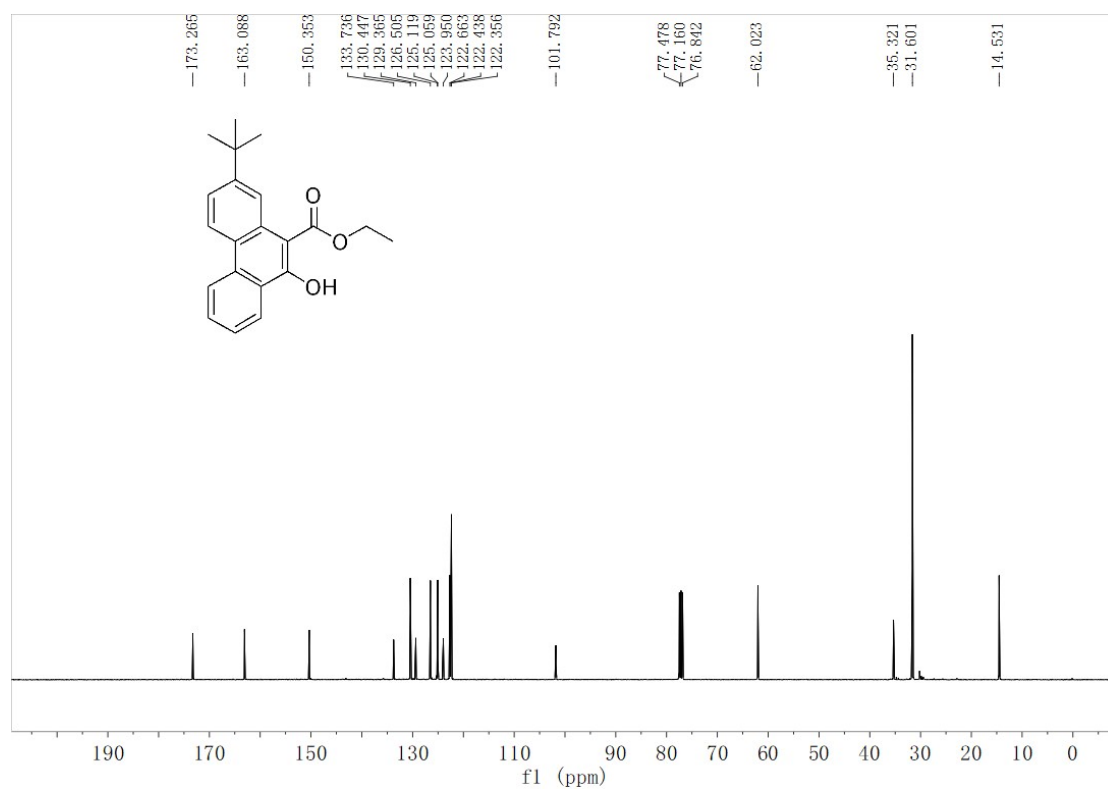

**2e** –  $^1\text{H}$  NMR (400 MHz,  $\text{CDCl}_3$ )

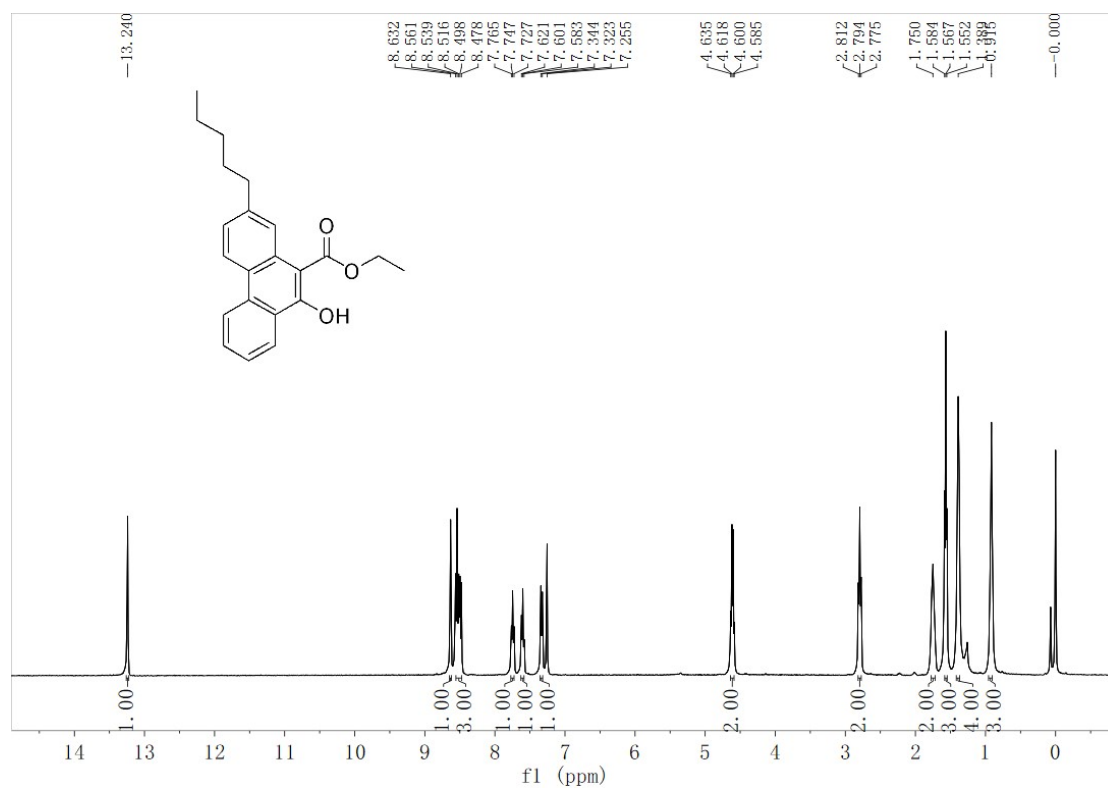

**2e** –  $^{13}\text{C}$  NMR (101 MHz,  $\text{CDCl}_3$ )

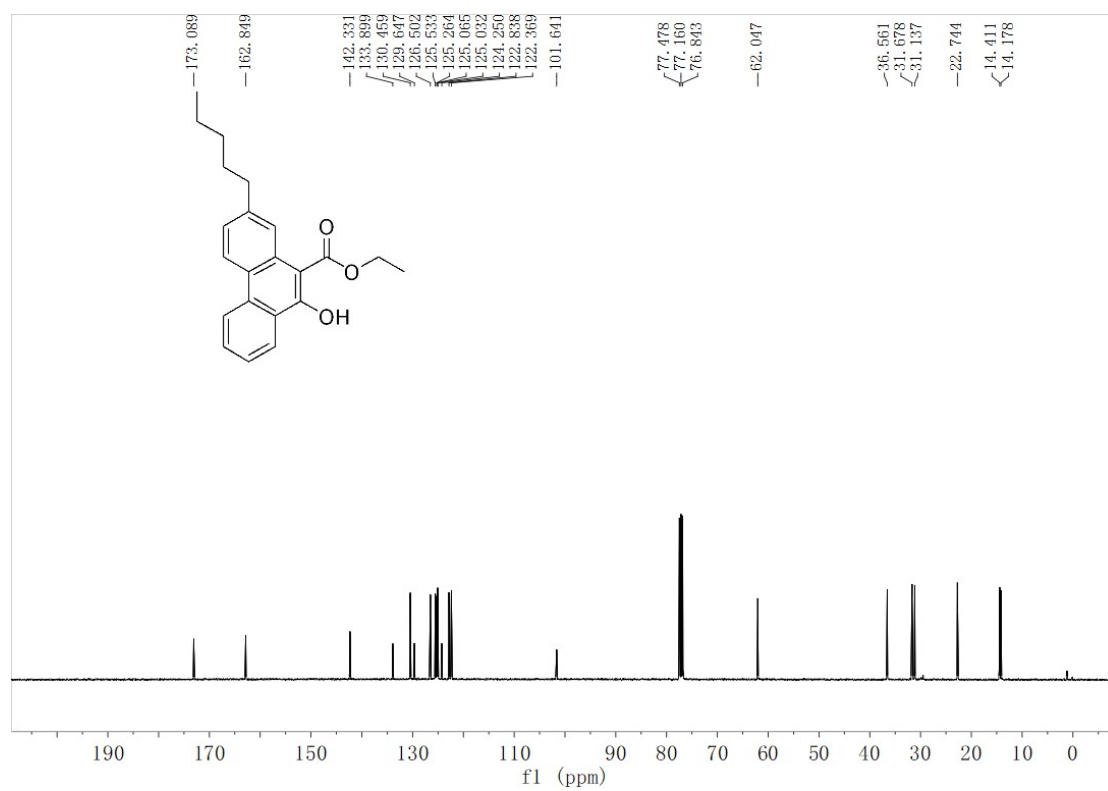

**2f** – <sup>1</sup>H NMR (400 MHz, CDCl<sub>3</sub>)

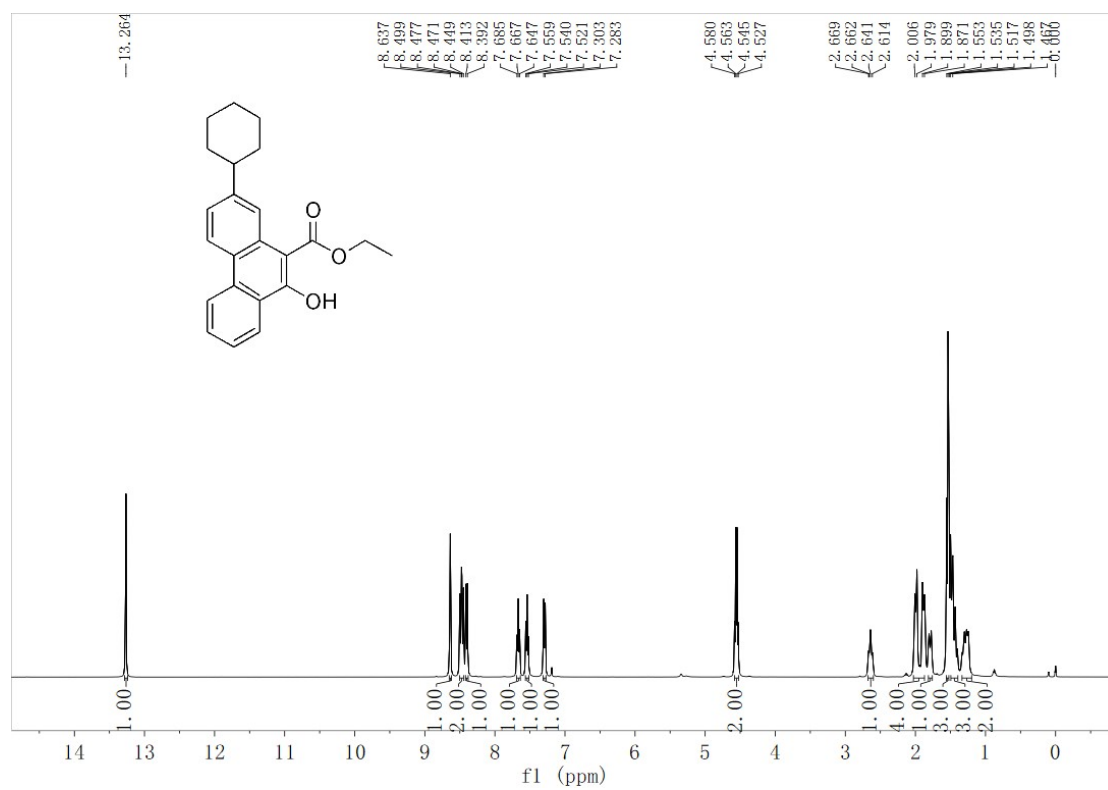

**2f** – <sup>13</sup>C NMR (101 MHz, CDCl<sub>3</sub>)

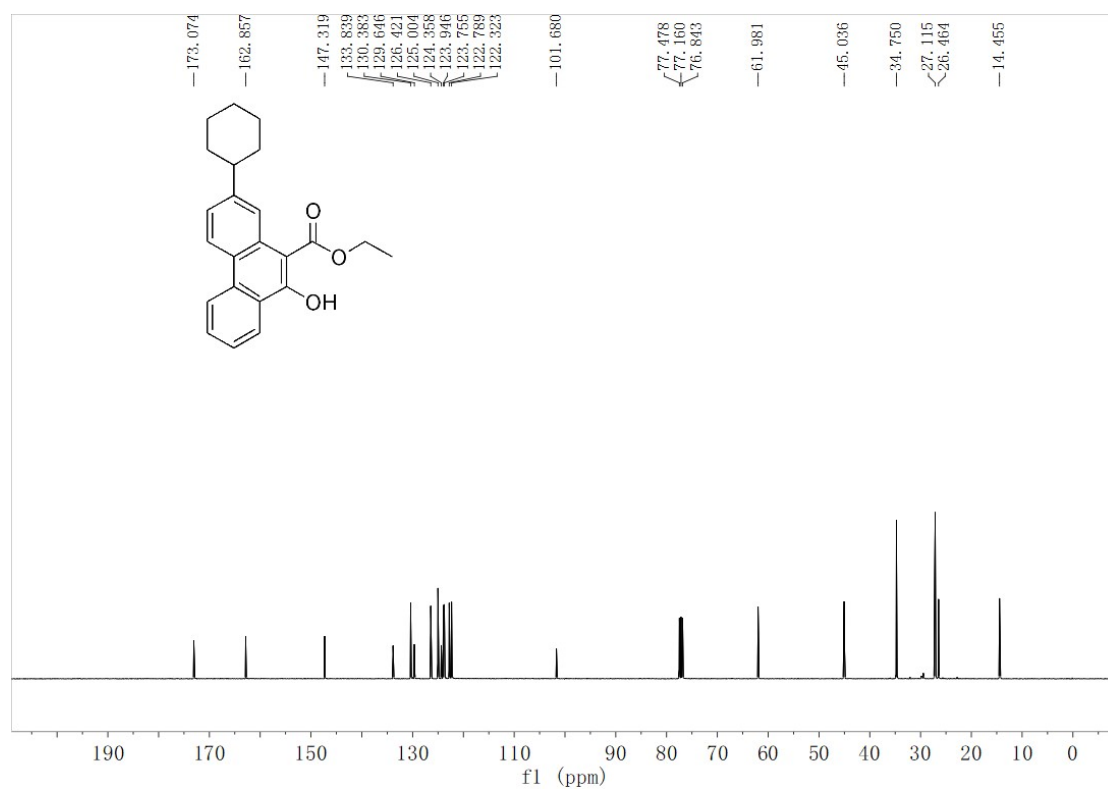



**2g** – <sup>1</sup>H NMR (400 MHz, CDCl<sub>3</sub>)

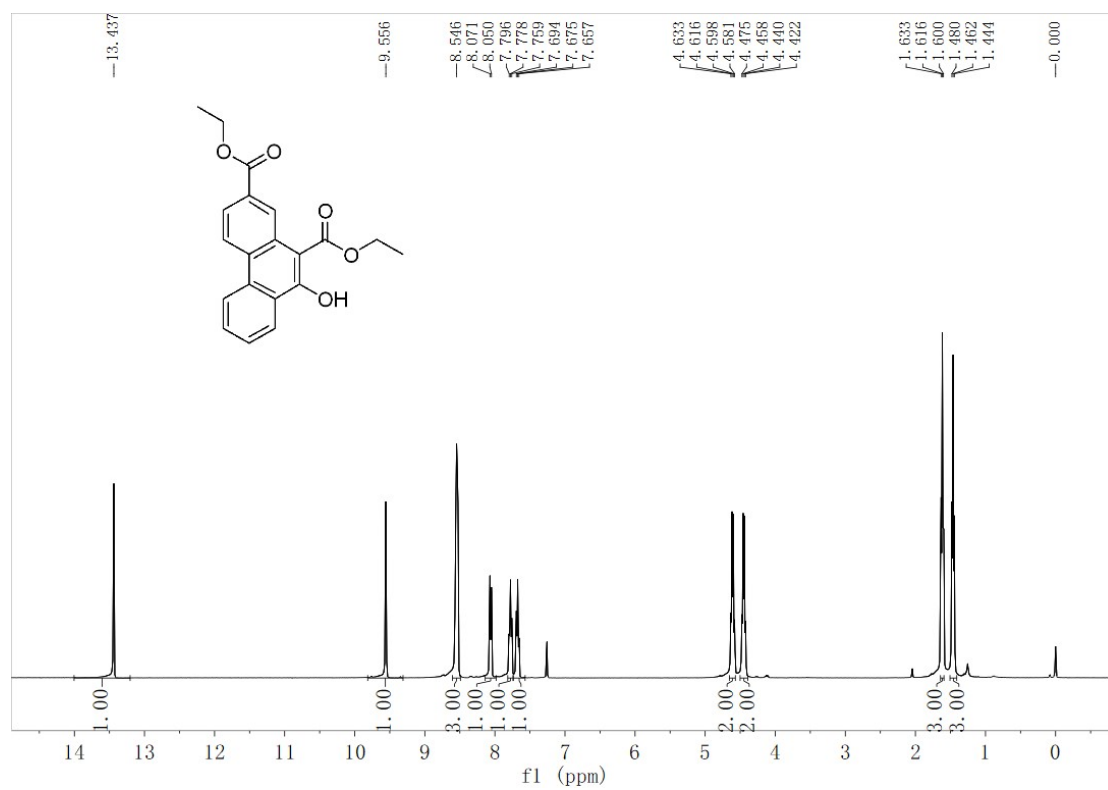

**2g** – <sup>13</sup>C NMR (101 MHz, CDCl<sub>3</sub>)

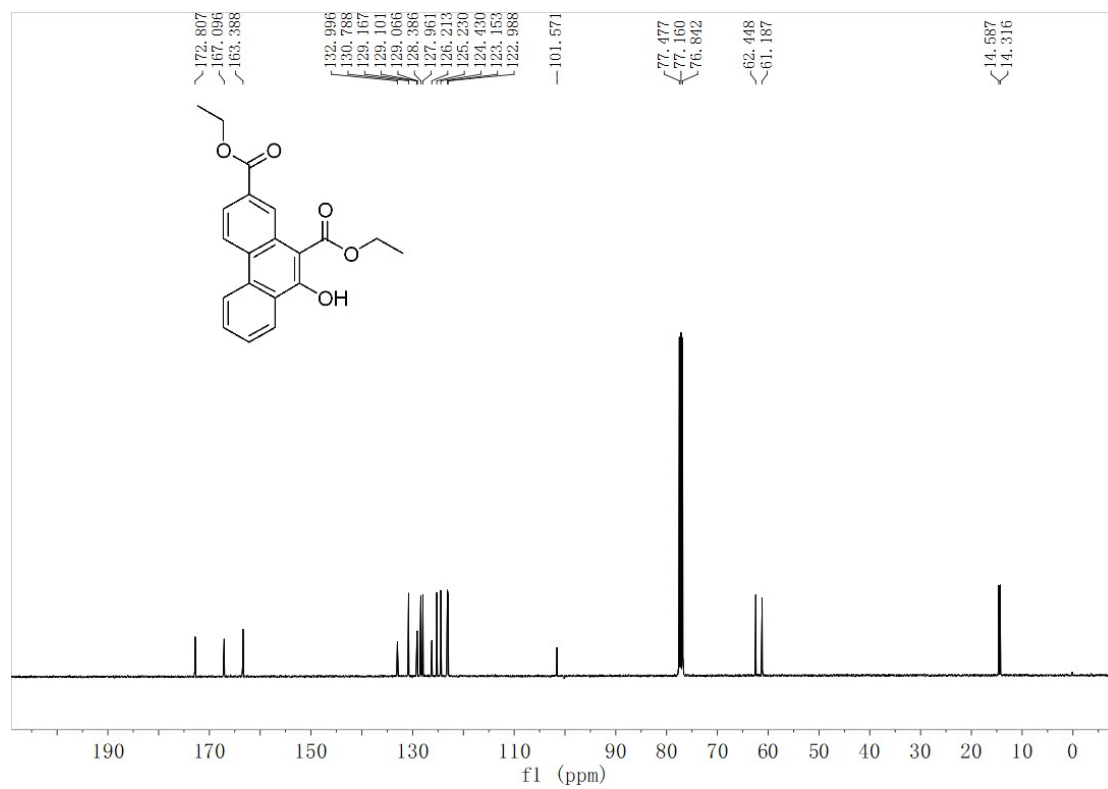

**2h** –  $^1\text{H}$  NMR (400 MHz,  $\text{CDCl}_3$ )

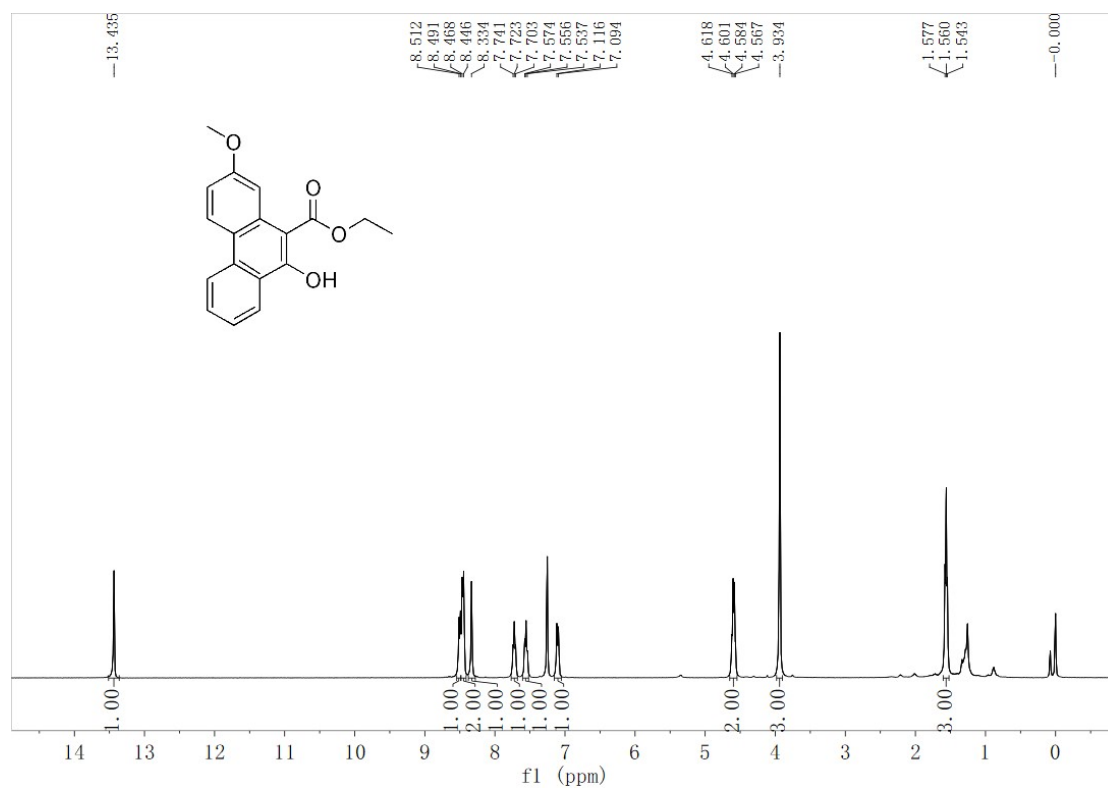

**2h** –  $^{13}\text{C}$  NMR (101 MHz,  $\text{CDCl}_3$ )

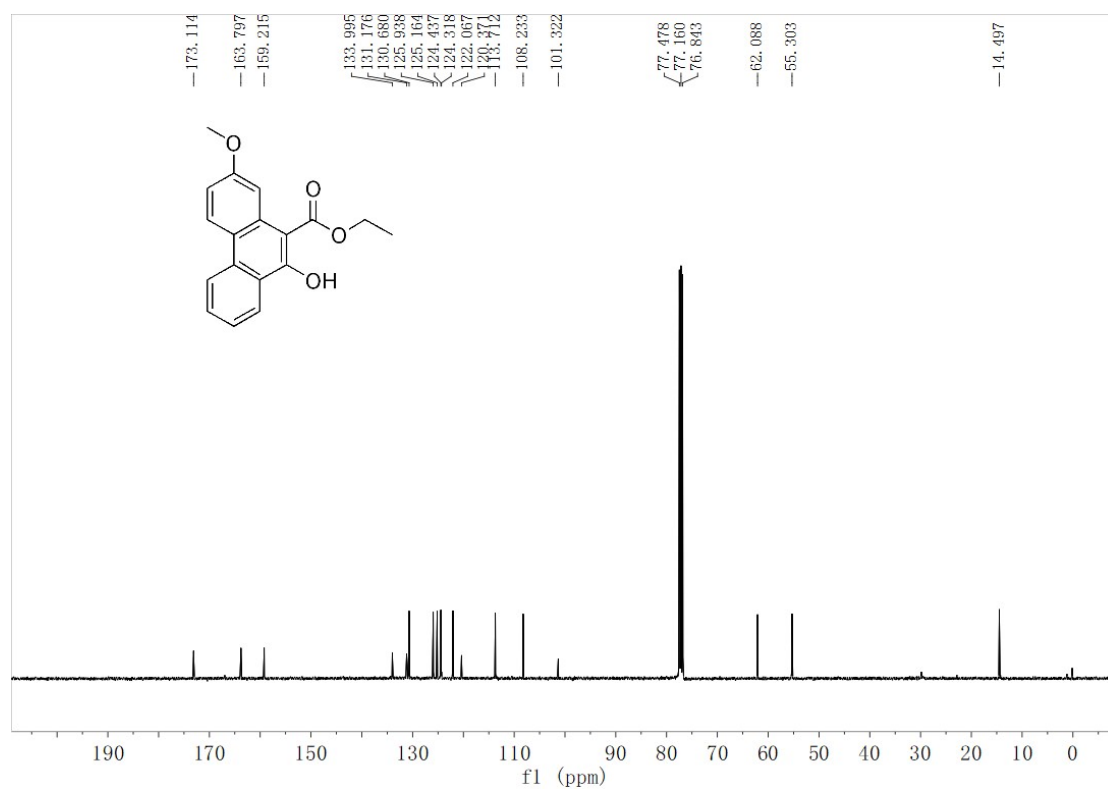

**2i** –  $^1\text{H}$  NMR (400 MHz,  $\text{CDCl}_3$ )

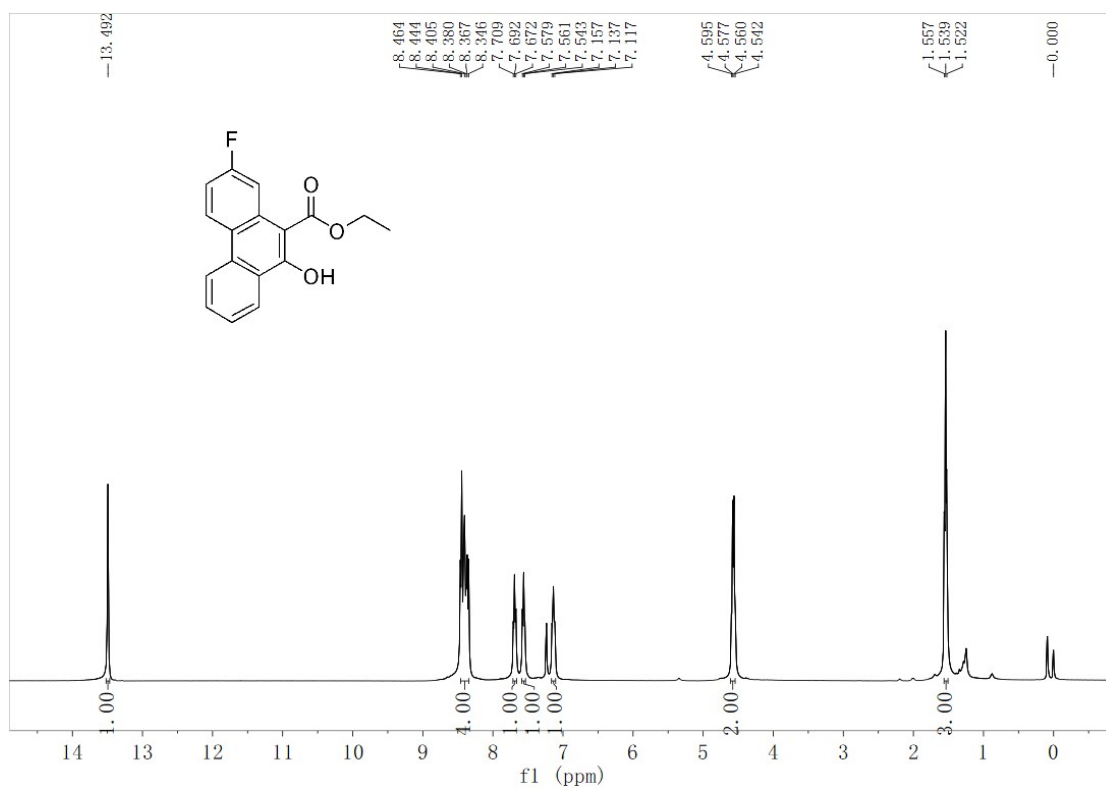

**2i** –  $^{13}\text{C}$  NMR (101 MHz,  $\text{CDCl}_3$ )

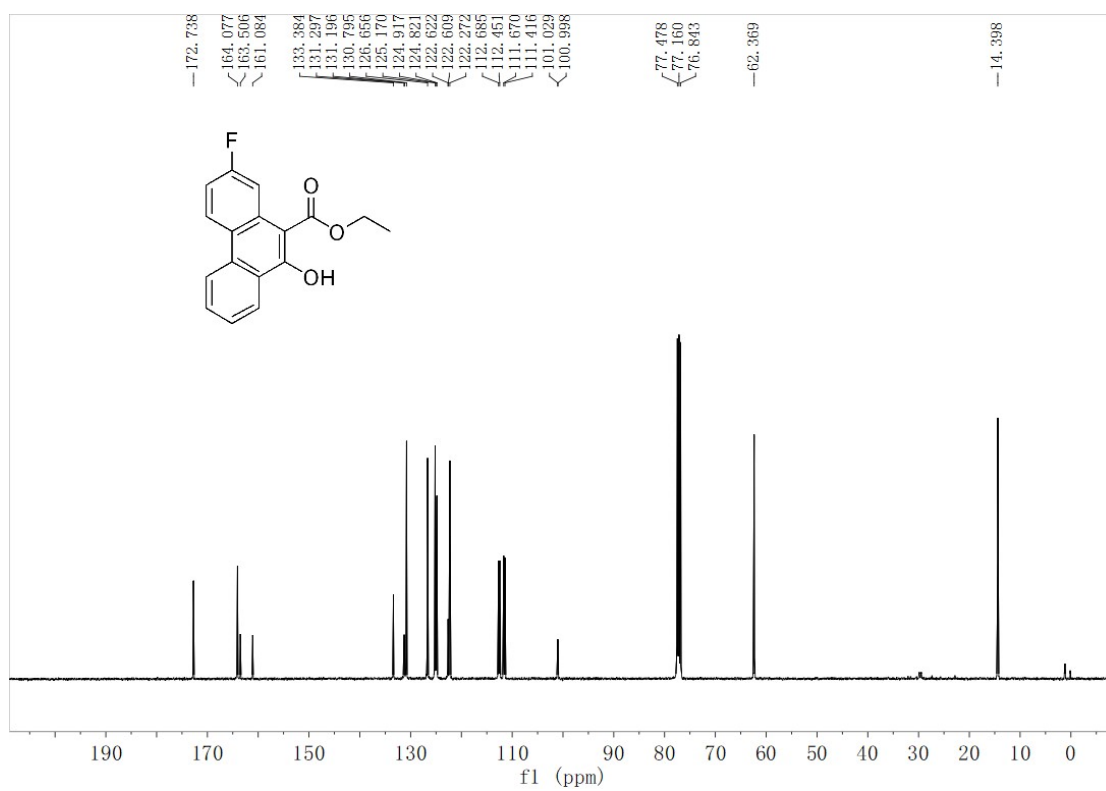

2i –  $^{19}\text{F}$  NMR (377 MHz,  $\text{CDCl}_3$ )

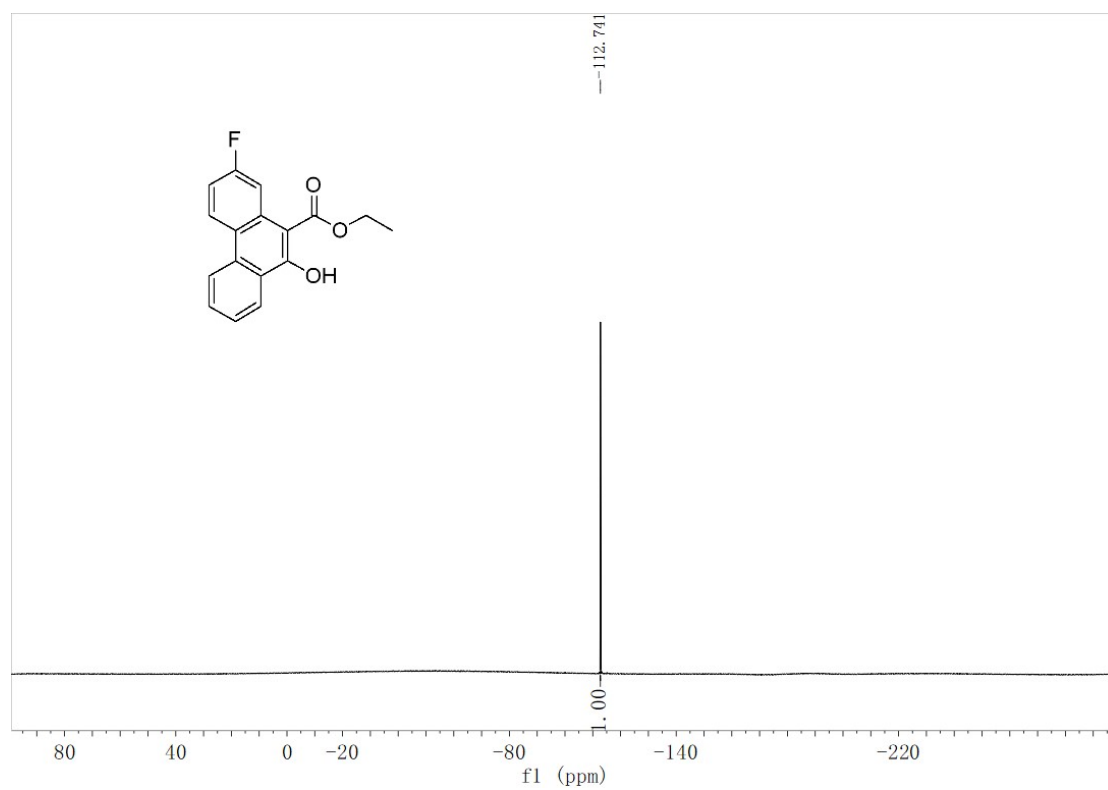

**2j** –  $^1\text{H}$  NMR (400 MHz,  $\text{CDCl}_3$ )

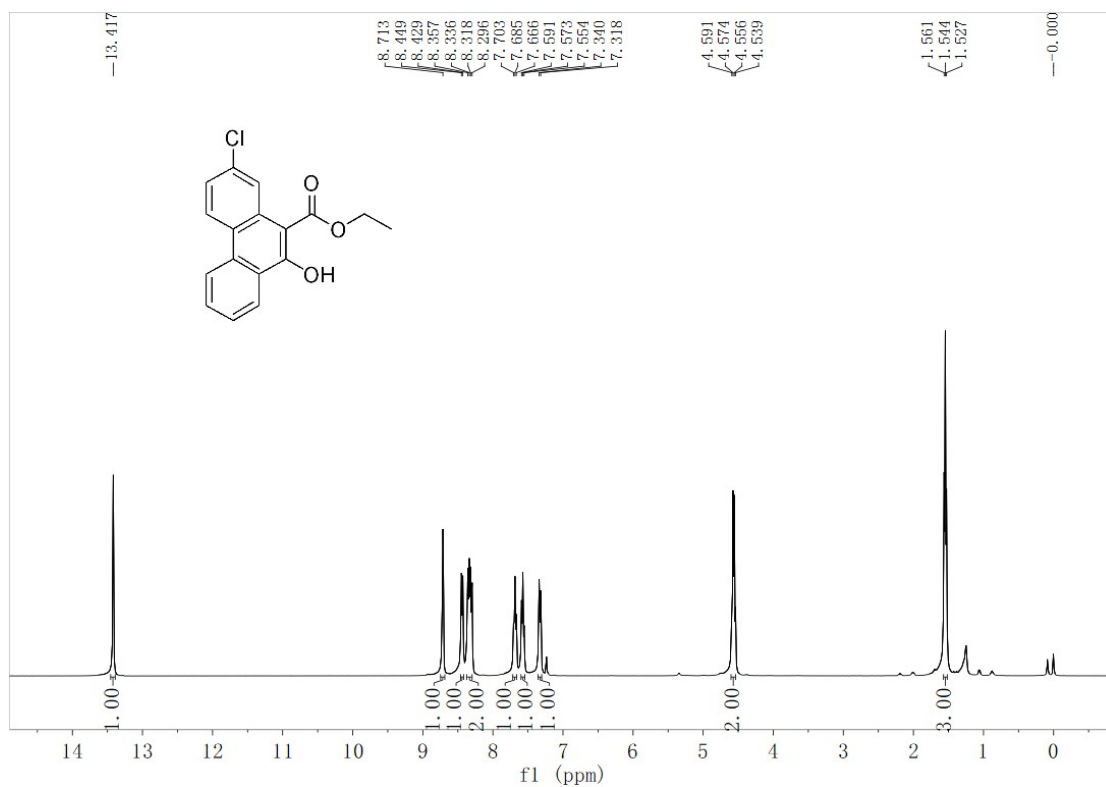

**2j** –  $^{13}\text{C}$  NMR (101 MHz,  $\text{CDCl}_3$ )

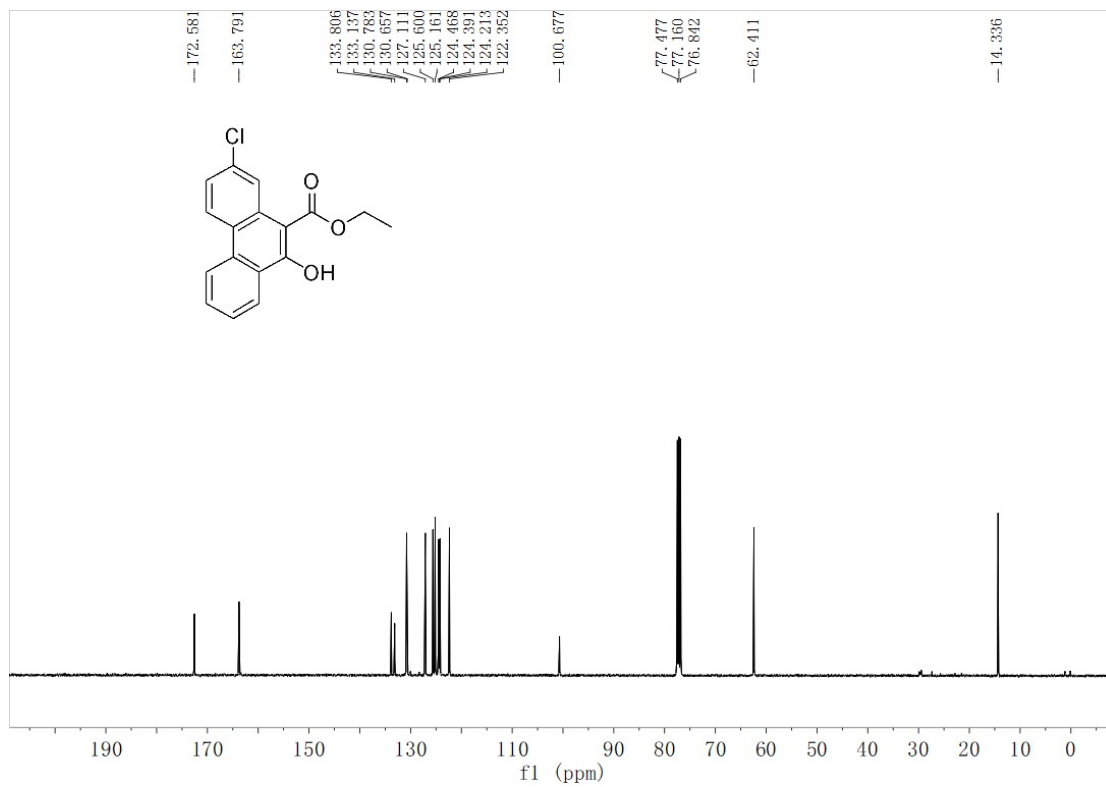

**2k** – <sup>1</sup>H NMR (400 MHz, CDCl<sub>3</sub>)

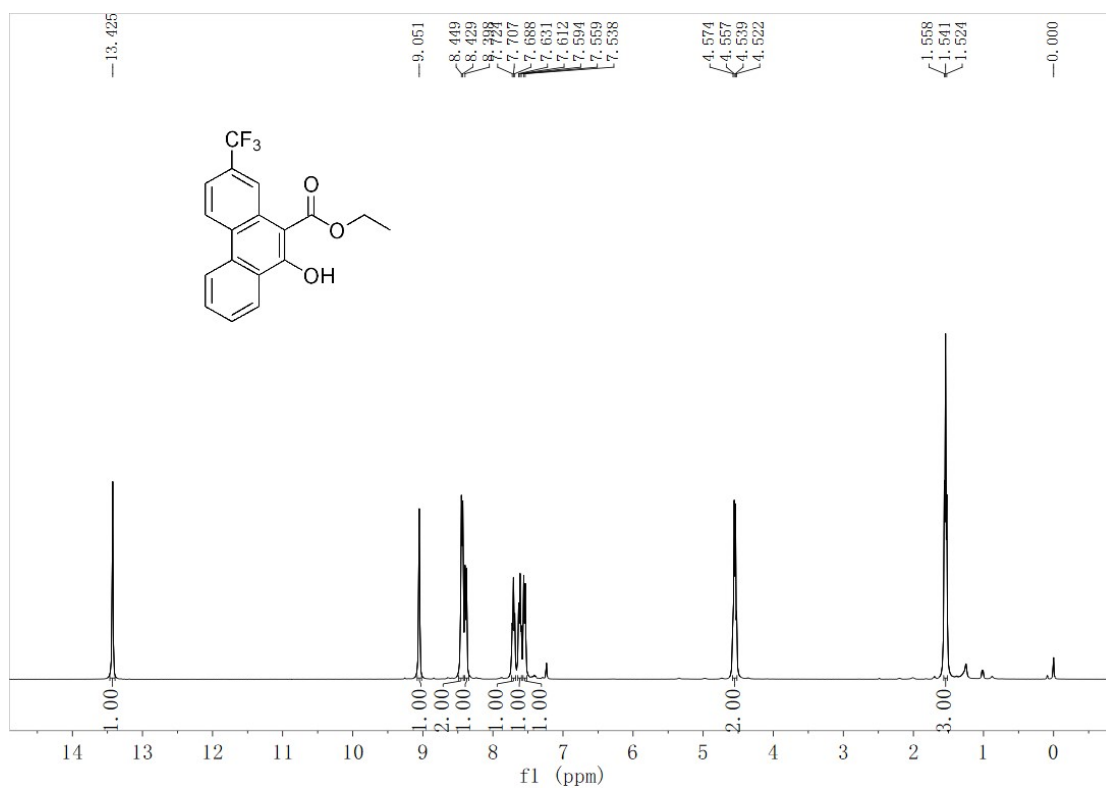

**2k** – <sup>13</sup>C NMR (101 MHz, CDCl<sub>3</sub>)

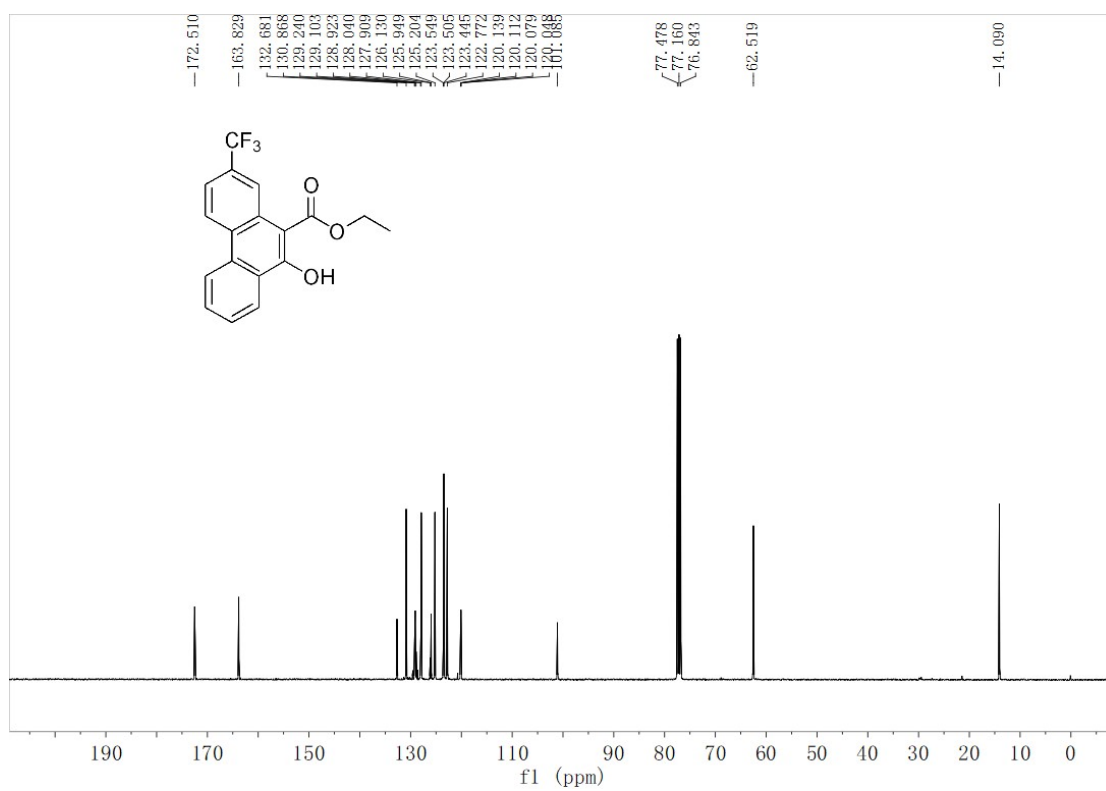

**2k** –  $^{19}\text{F}$  NMR (377 MHz,  $\text{CDCl}_3$ )

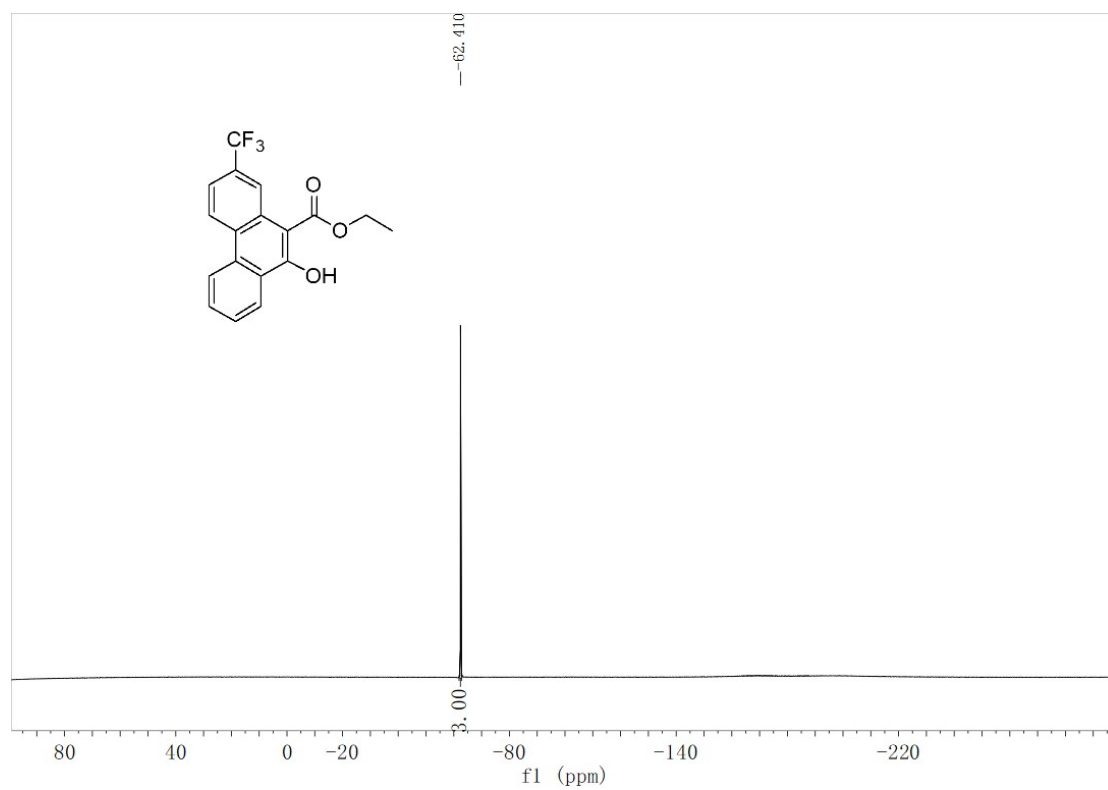

**21** – <sup>1</sup>H NMR (400 MHz, CDCl<sub>3</sub>)

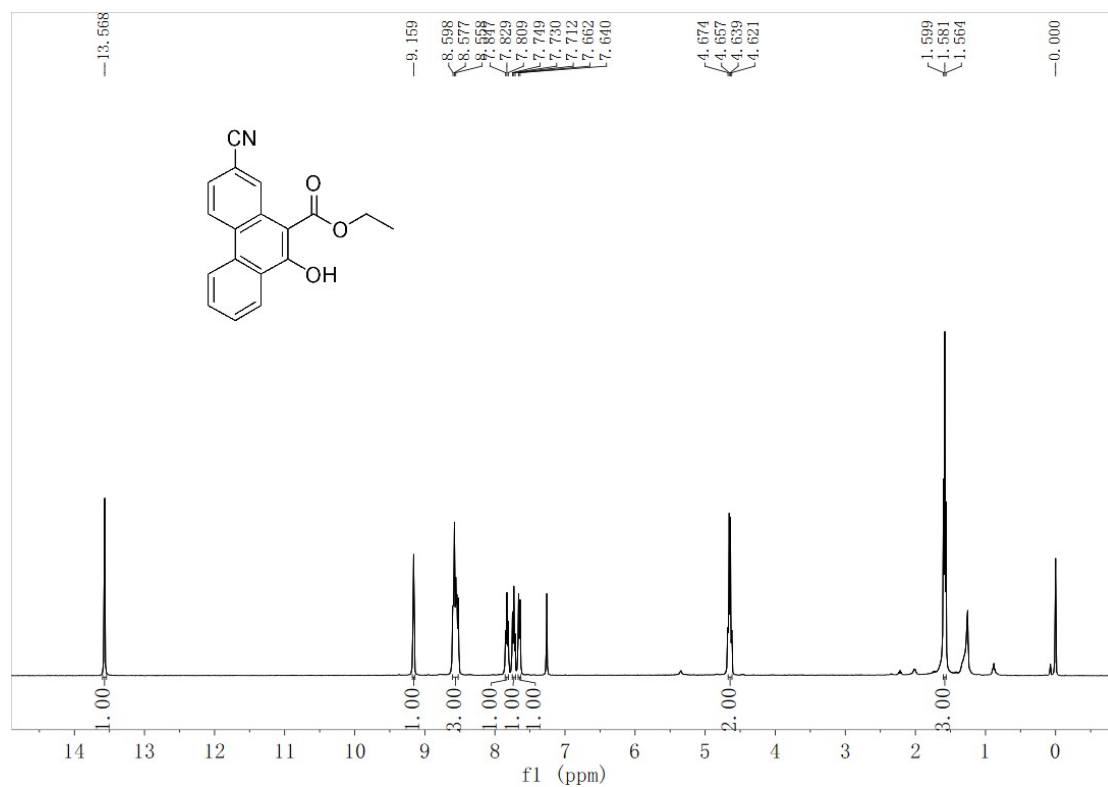

**21** – <sup>13</sup>C NMR (101 MHz, CDCl<sub>3</sub>)

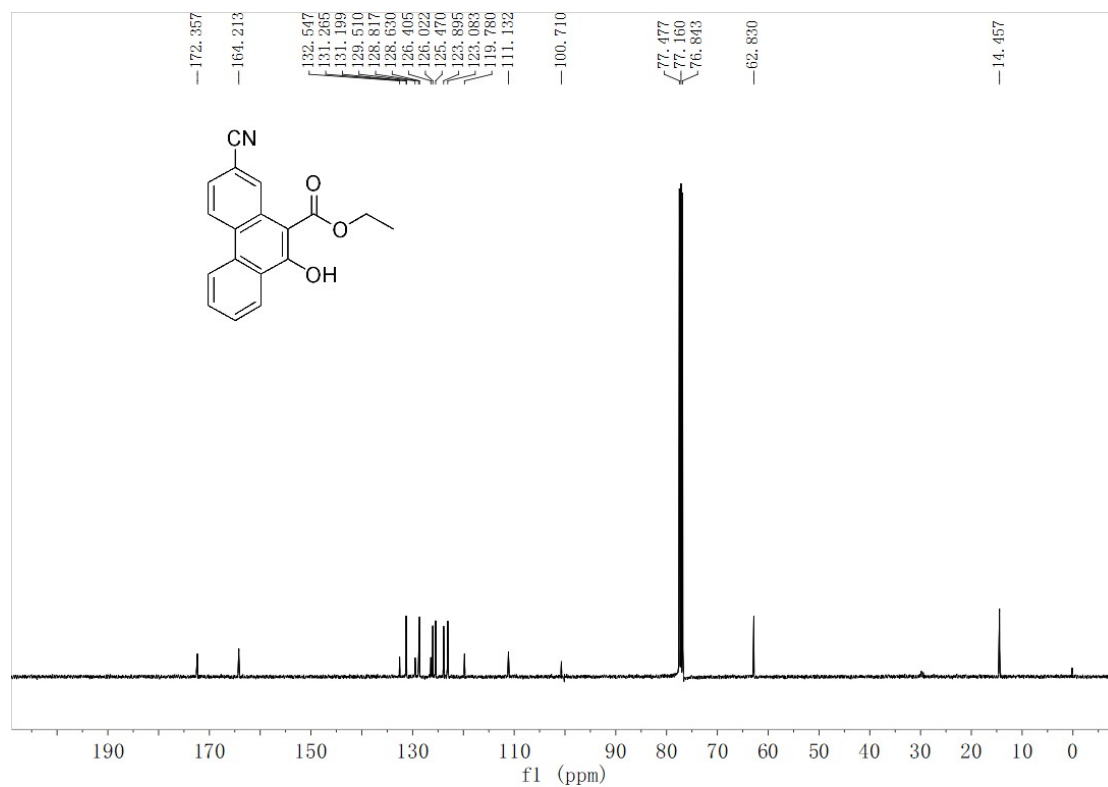



**2m** – <sup>1</sup>H NMR (400 MHz, CDCl<sub>3</sub>)

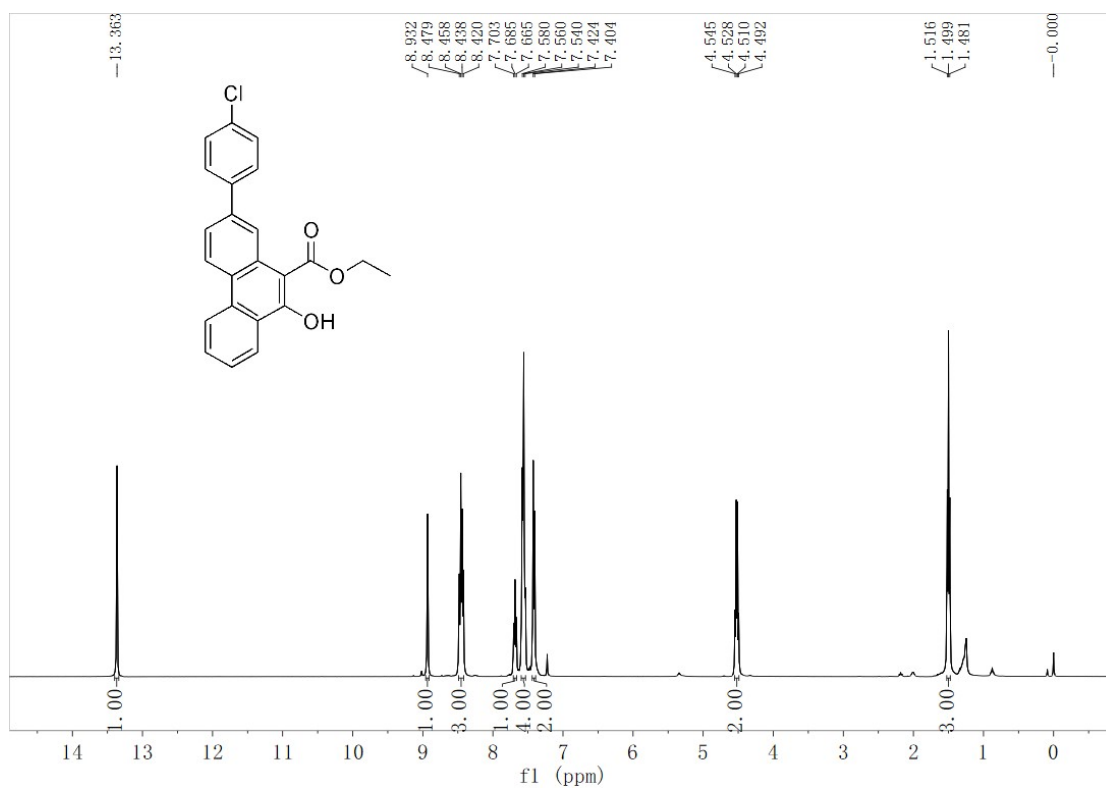

**2m** – <sup>13</sup>C NMR (101 MHz, CDCl<sub>3</sub>)

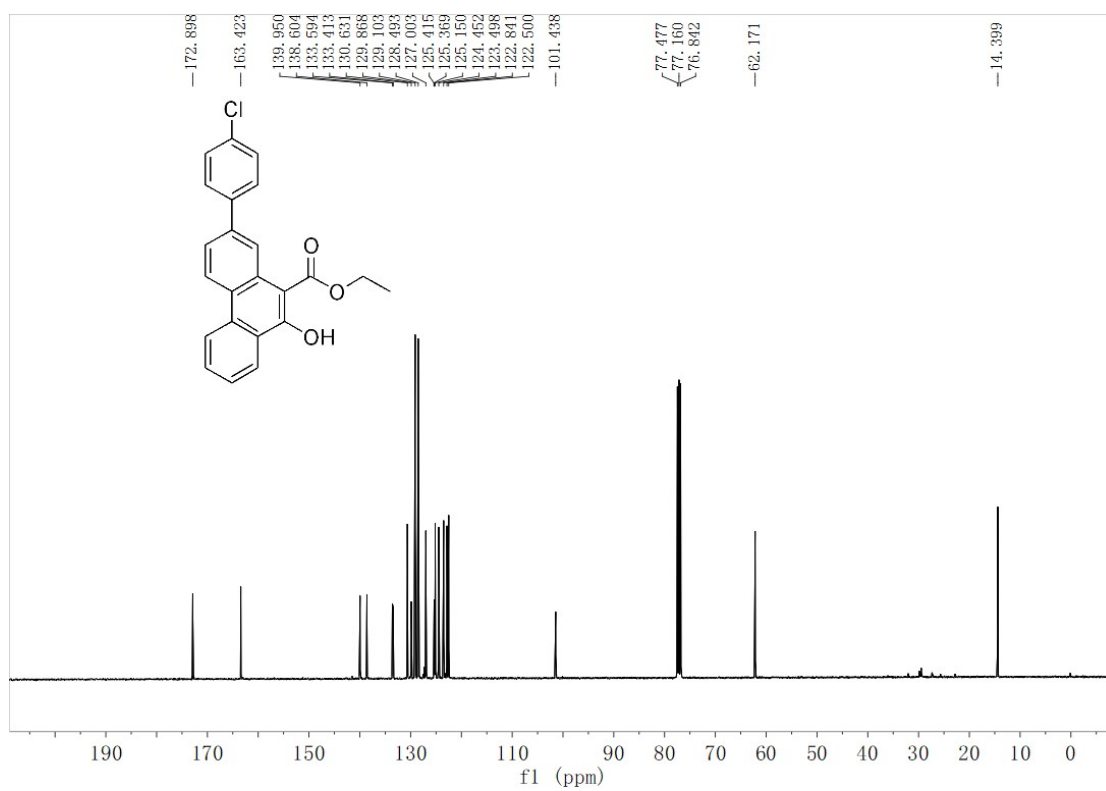

**2n** – <sup>1</sup>H NMR (400 MHz, CDCl<sub>3</sub>)

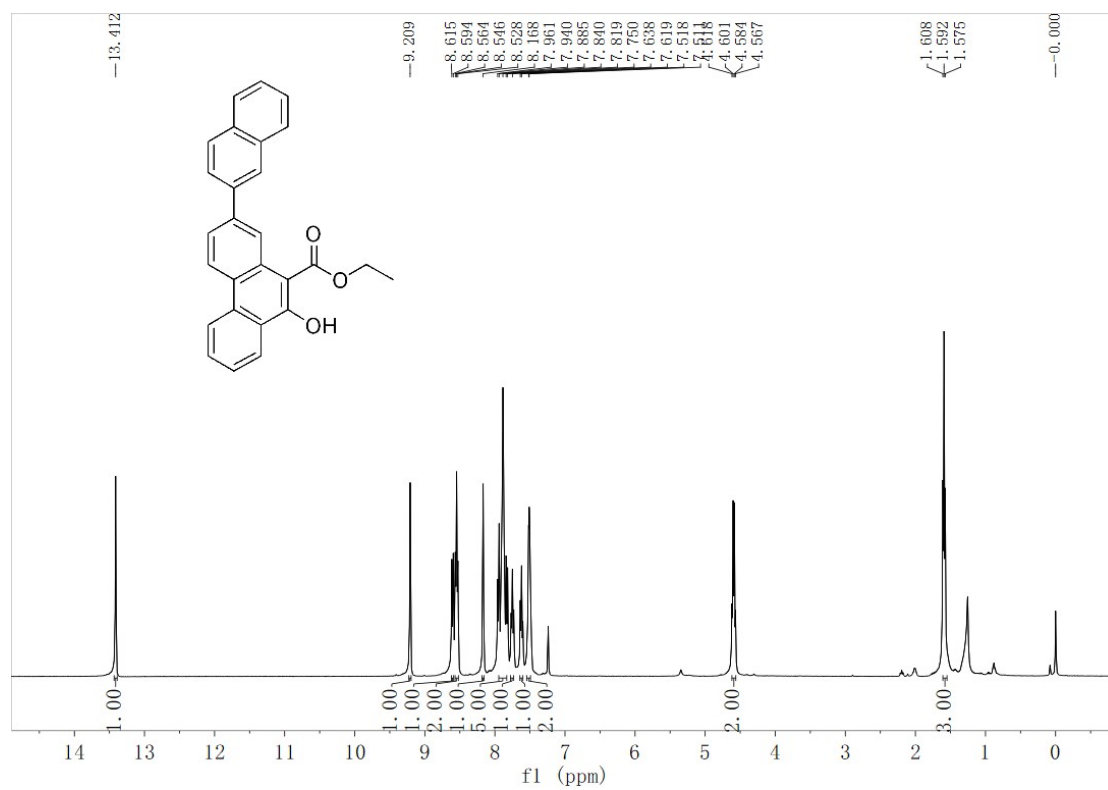

**2n** – <sup>13</sup>C NMR (101 MHz, CDCl<sub>3</sub>)

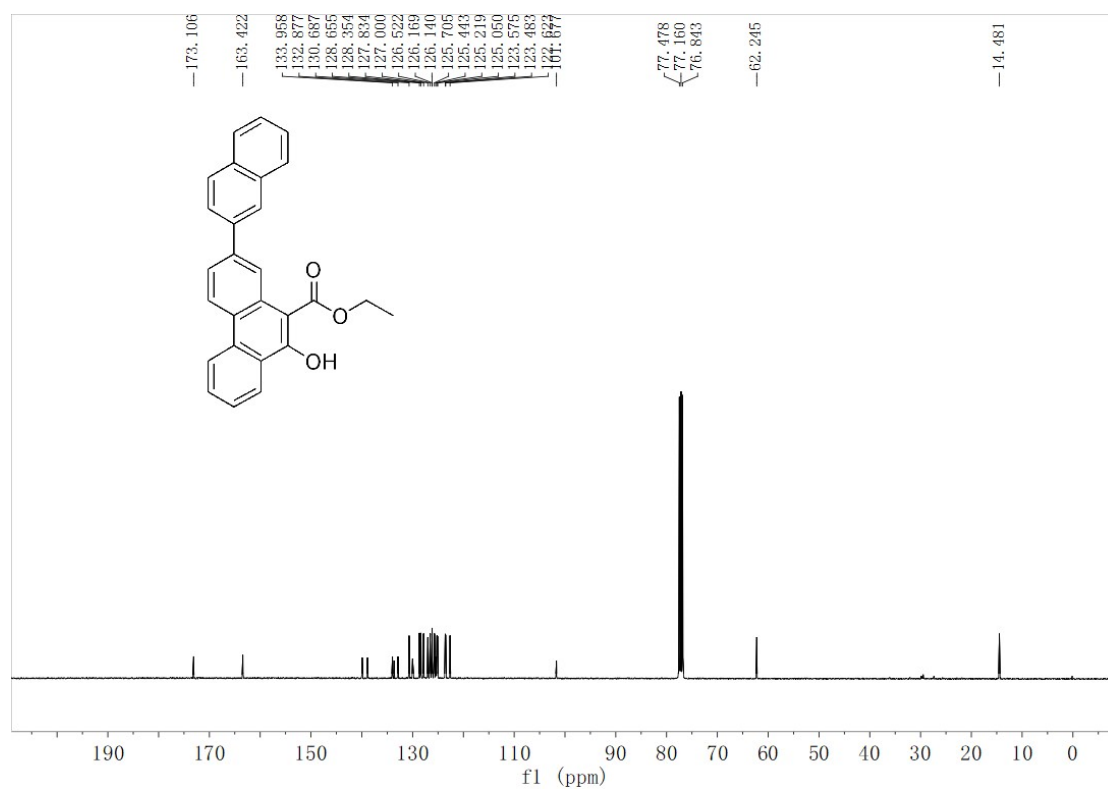

**2o** – <sup>1</sup>H NMR (400 MHz, CDCl<sub>3</sub>)

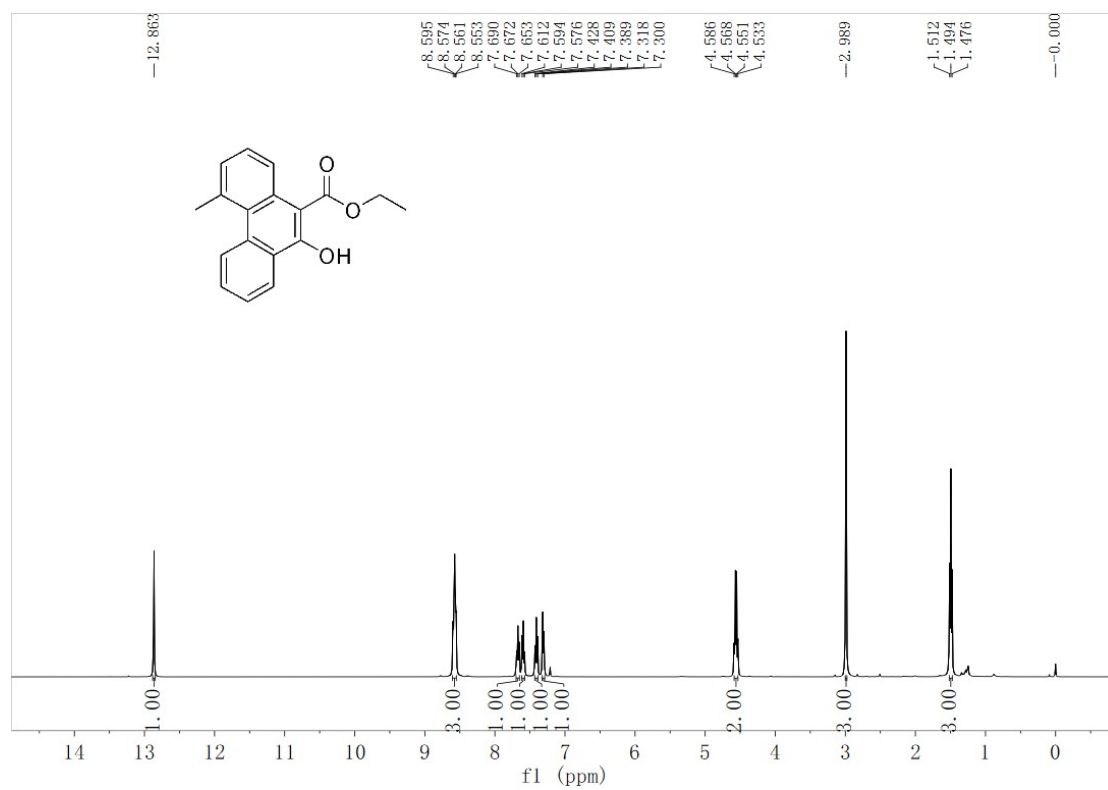

**2o** – <sup>13</sup>C NMR (101 MHz, CDCl<sub>3</sub>)

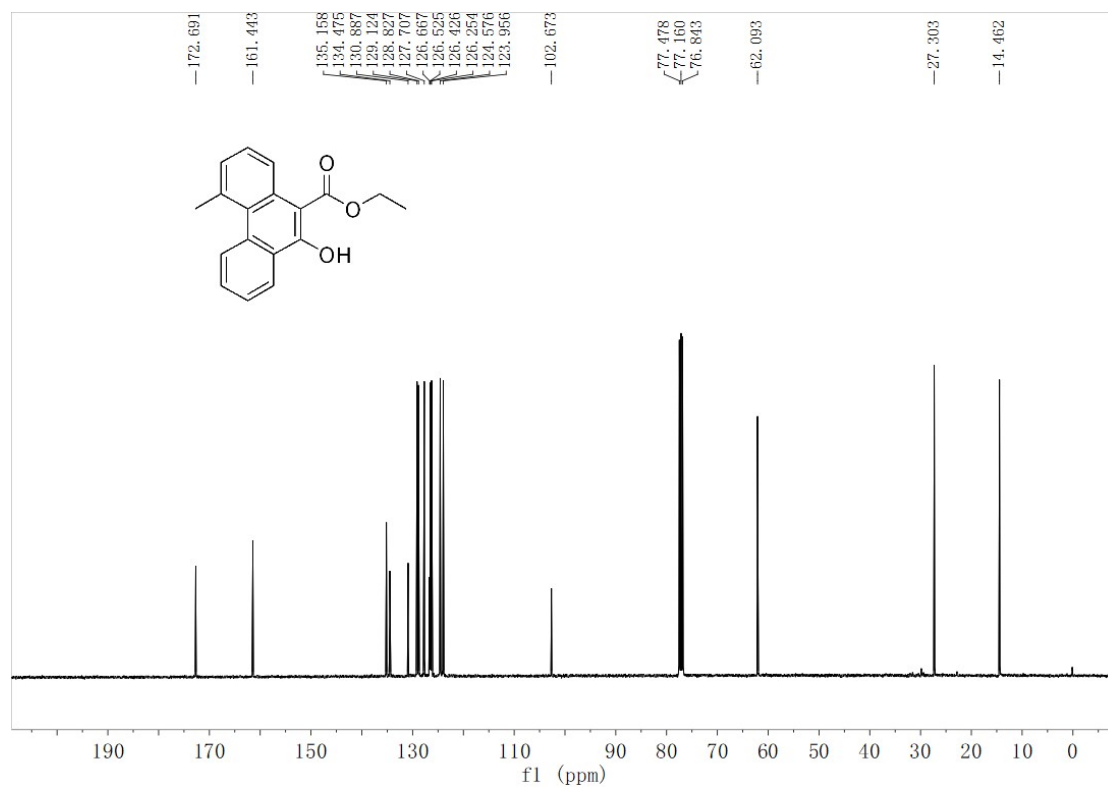

**2p** – <sup>1</sup>H NMR (400 MHz, CDCl<sub>3</sub>)

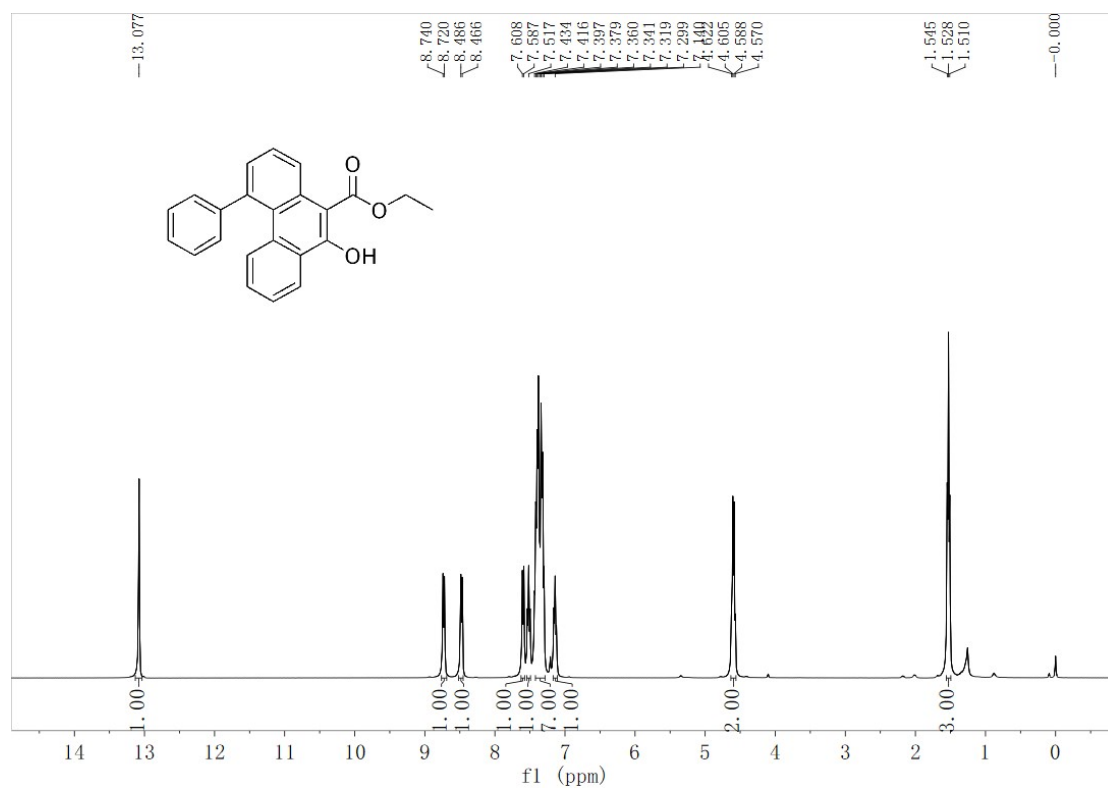

**2p** – <sup>13</sup>C NMR (101 MHz, CDCl<sub>3</sub>)

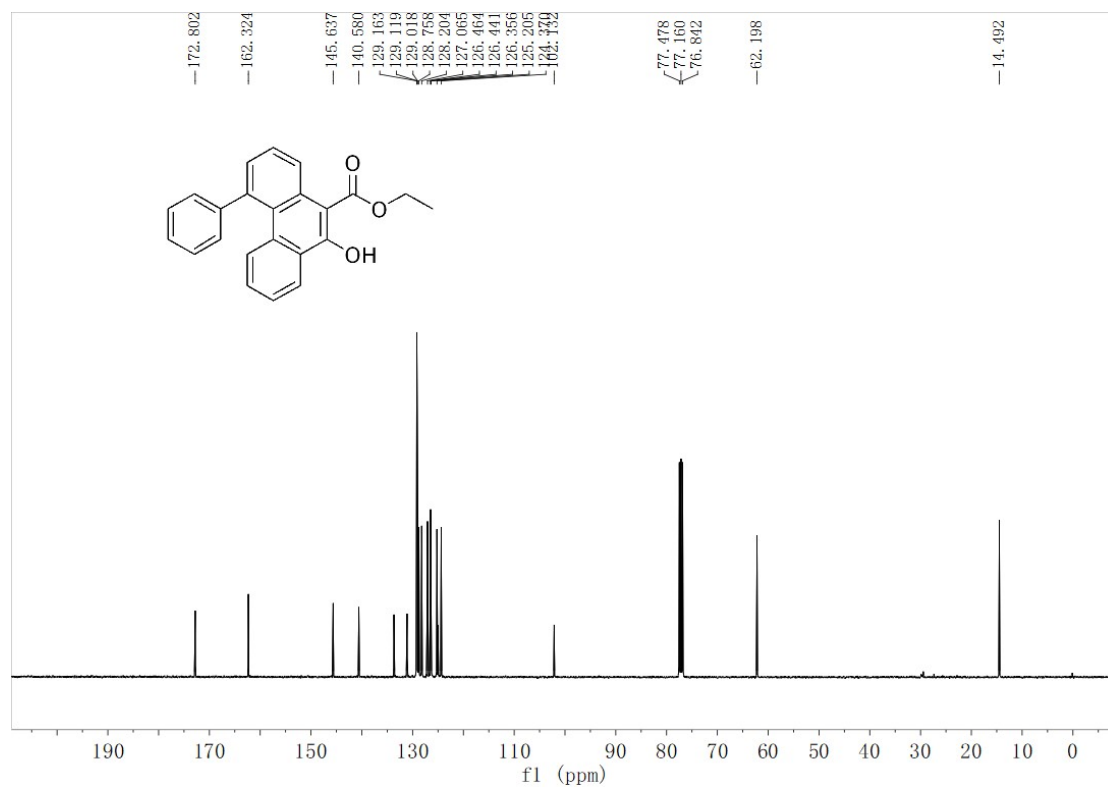

**2q** –  $^1\text{H}$  NMR (400 MHz,  $\text{CDCl}_3$ )

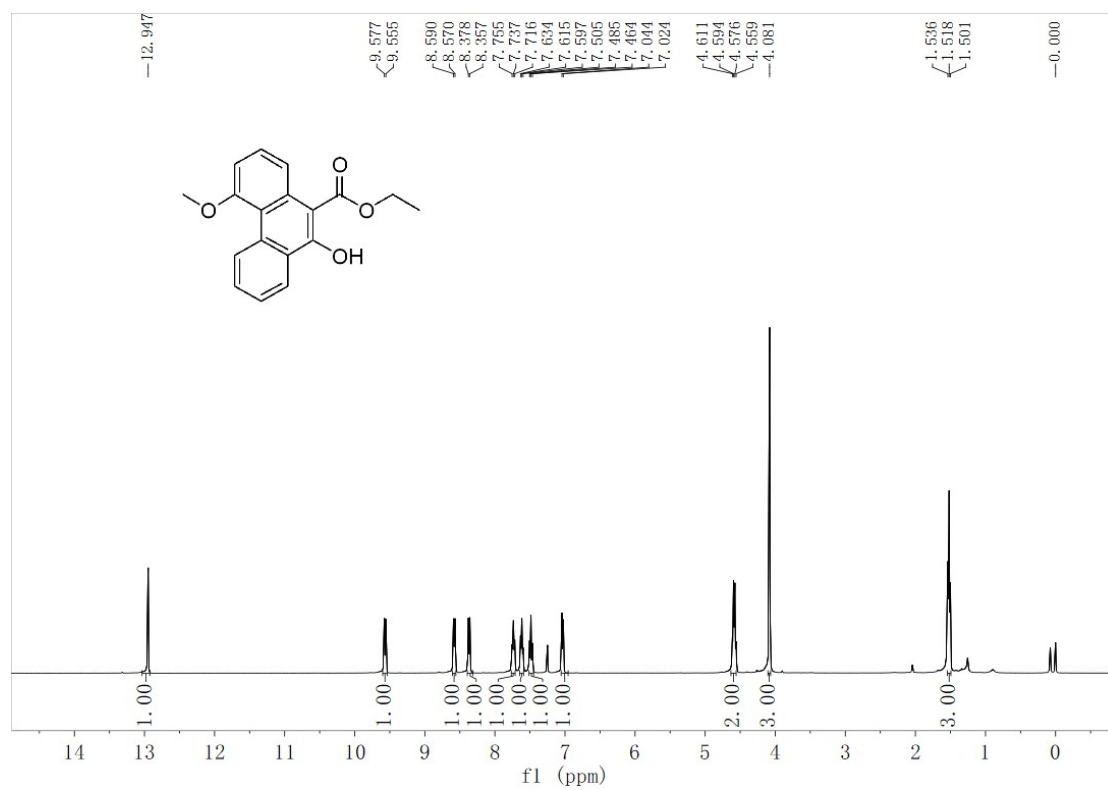

**2q** –  $^{13}\text{C}$  NMR (101 MHz,  $\text{CDCl}_3$ )

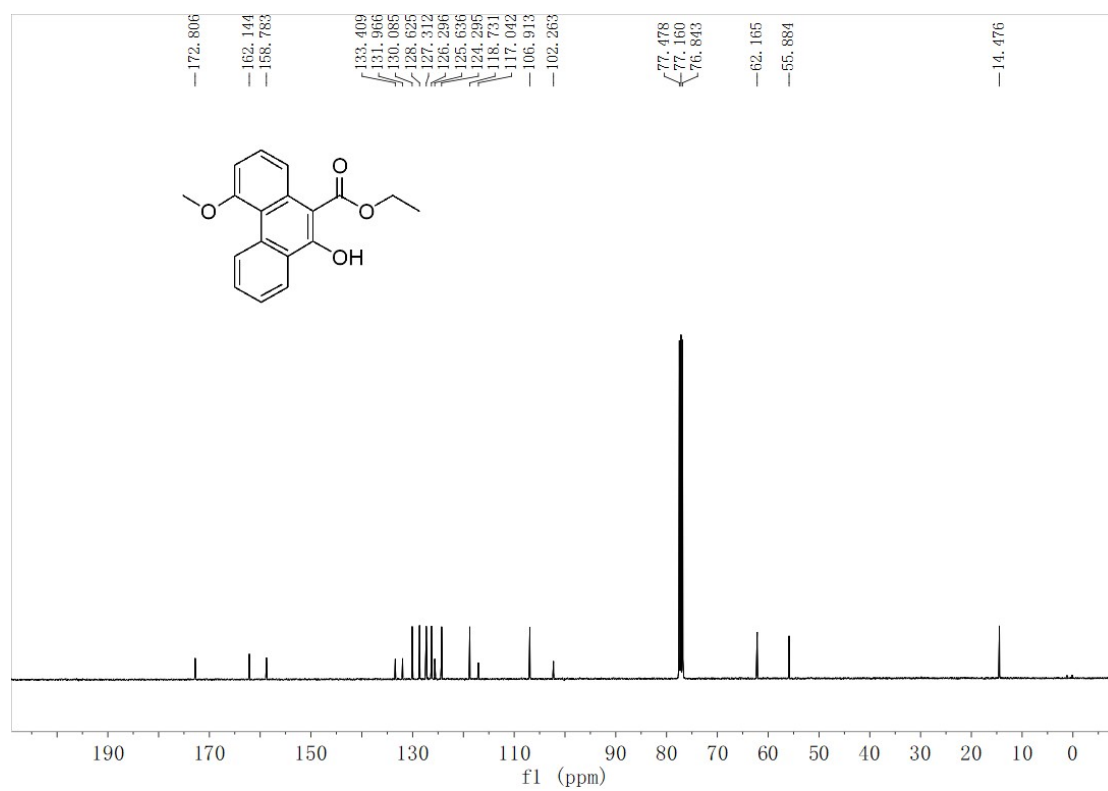

**2r** – <sup>1</sup>H NMR (400 MHz, CDCl<sub>3</sub>)

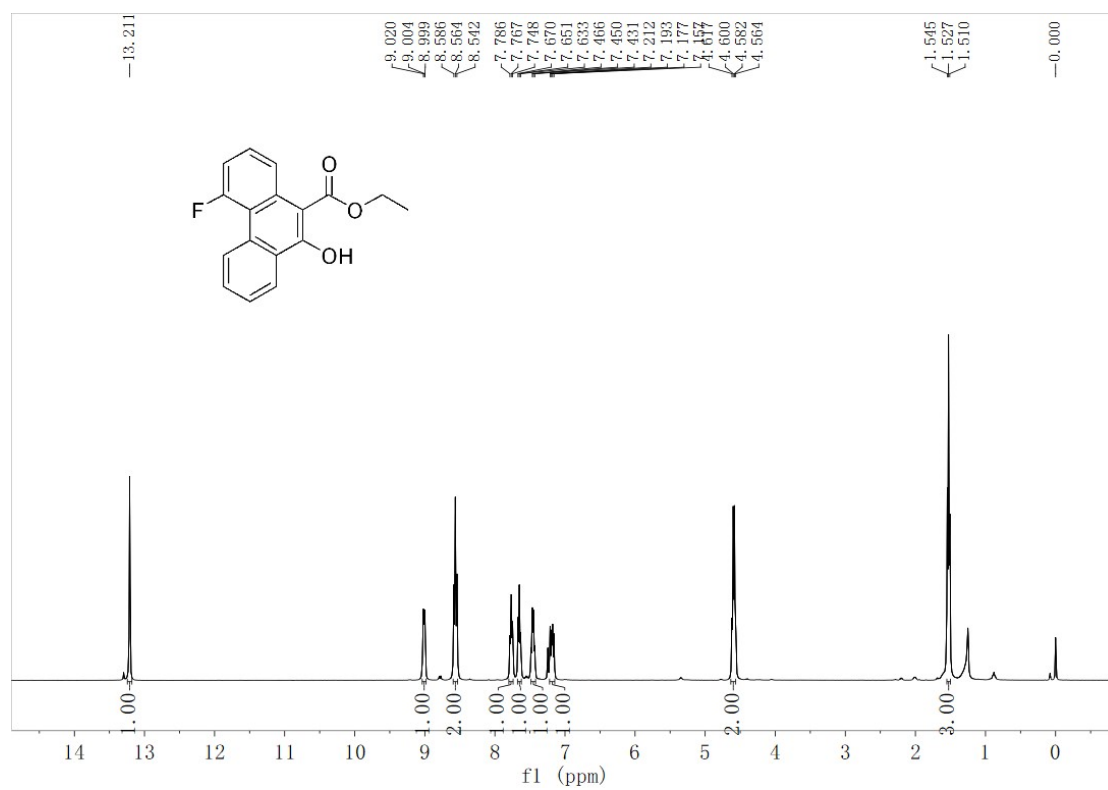

**2r** – <sup>13</sup>C NMR (101 MHz, CDCl<sub>3</sub>)

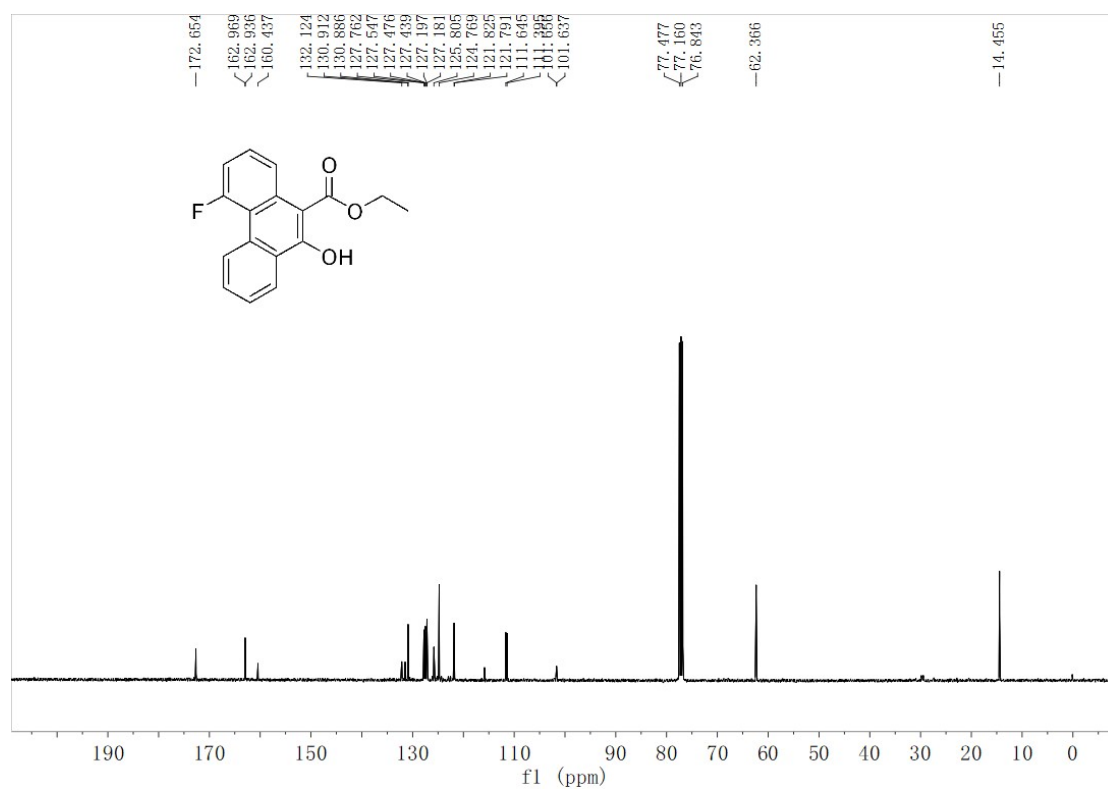

2r –  $^{19}\text{F}$  NMR (377 MHz,  $\text{CDCl}_3$ )

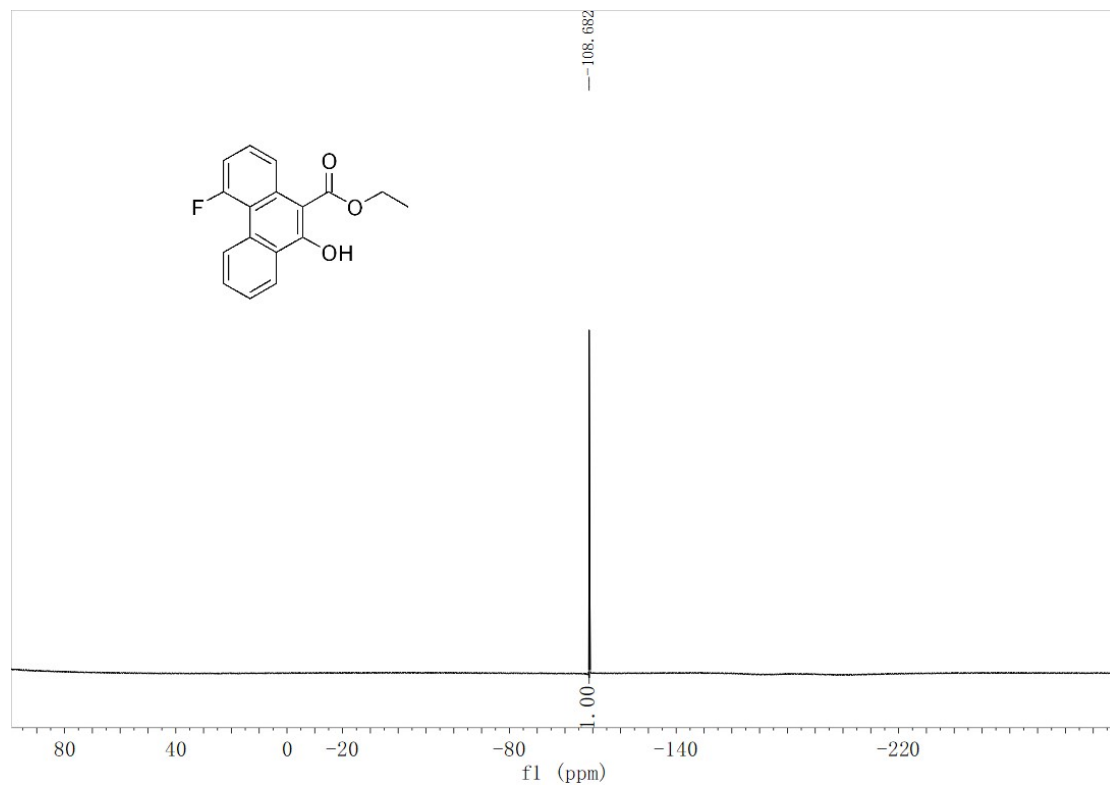

**2s** – <sup>1</sup>H NMR (400 MHz, CDCl<sub>3</sub>)

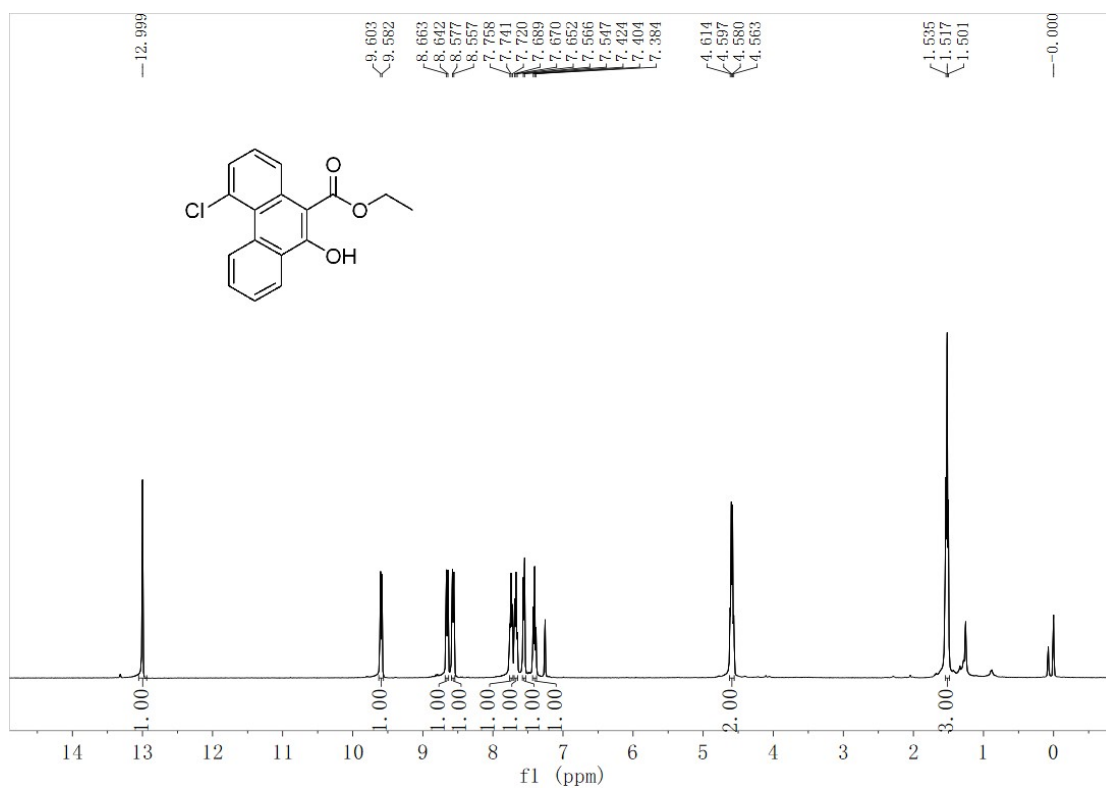

**2s** – <sup>13</sup>C NMR (101 MHz, CDCl<sub>3</sub>)

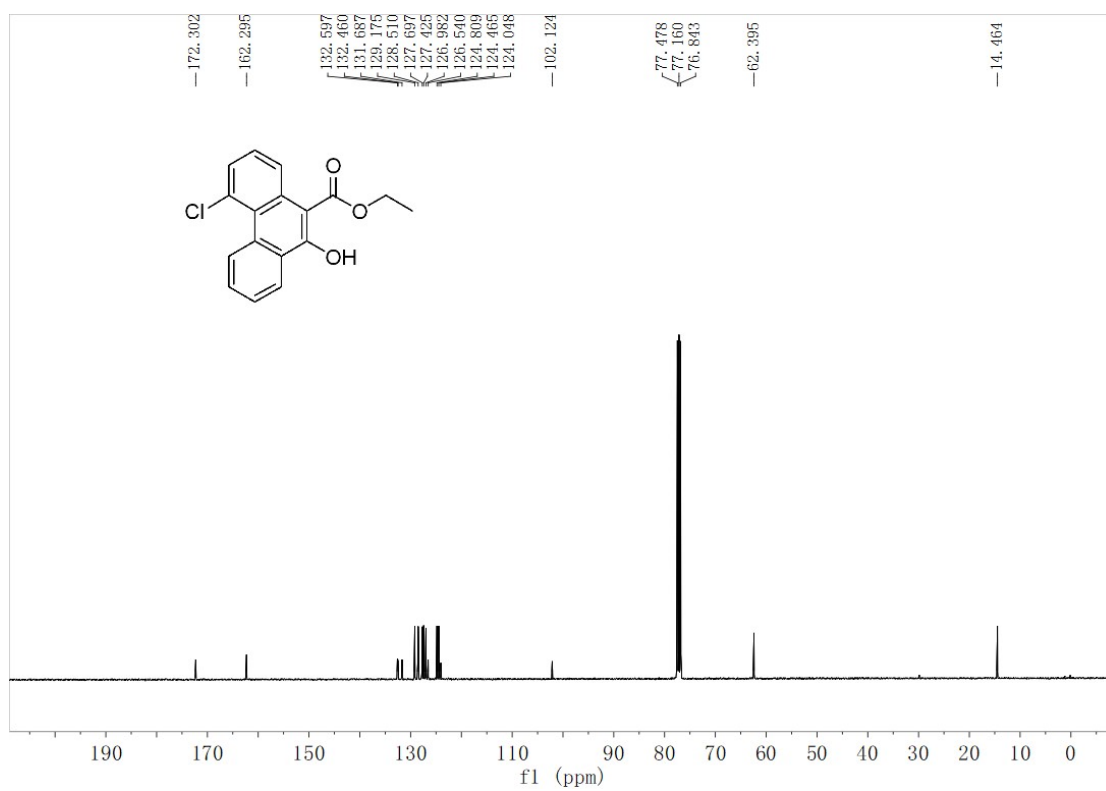



**2t:(2t') – <sup>1</sup>H NMR (400 MHz, CDCl<sub>3</sub>)**

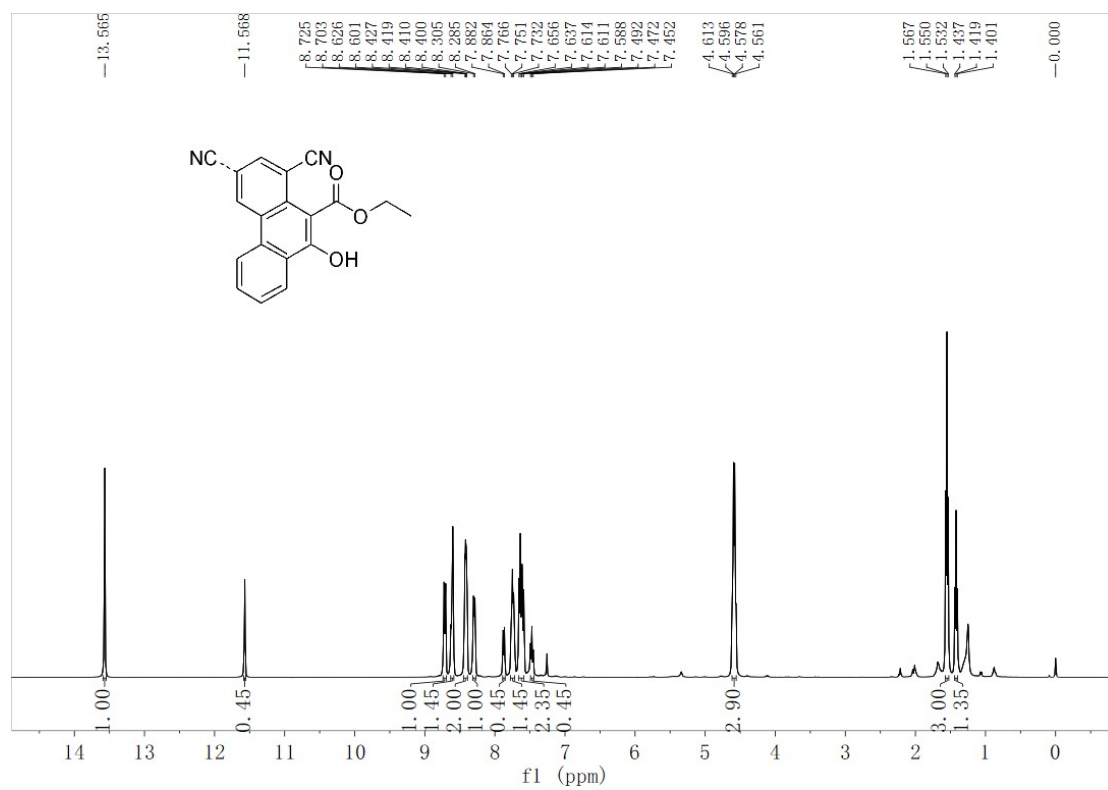

**2t:(2t') – <sup>13</sup>C NMR (101 MHz, CDCl<sub>3</sub>)**

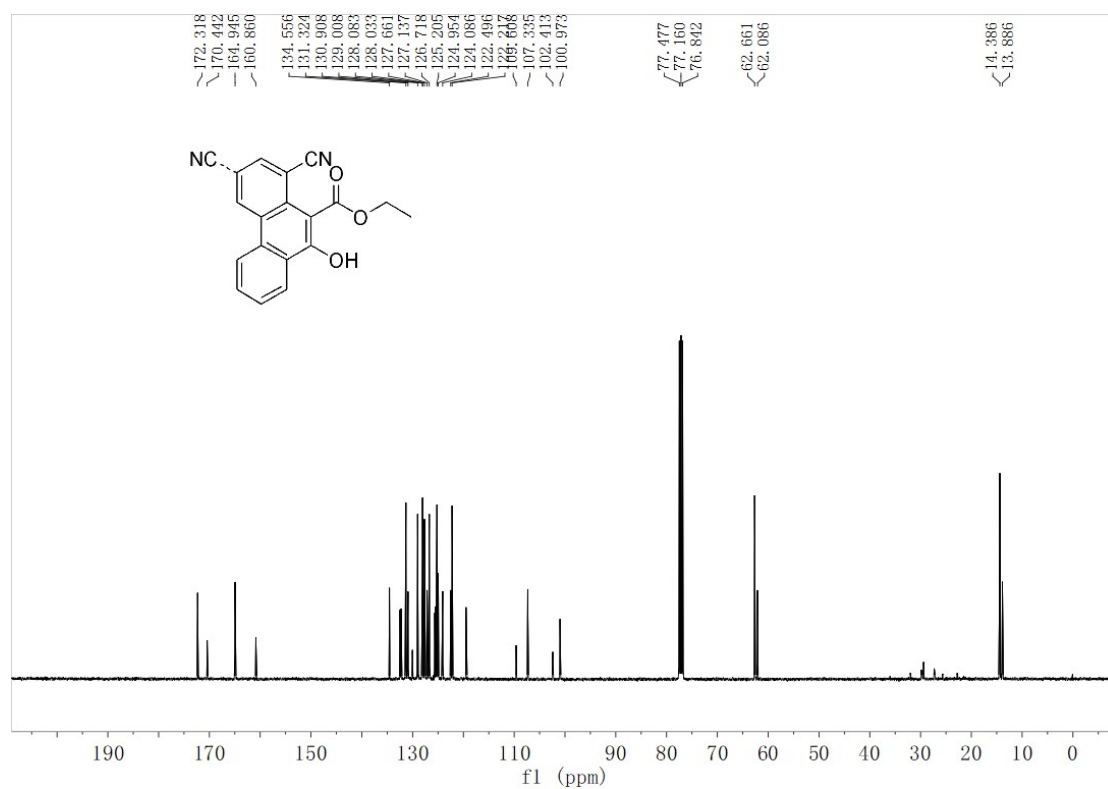

**2u** – <sup>1</sup>H NMR (400 MHz, CDCl<sub>3</sub>)

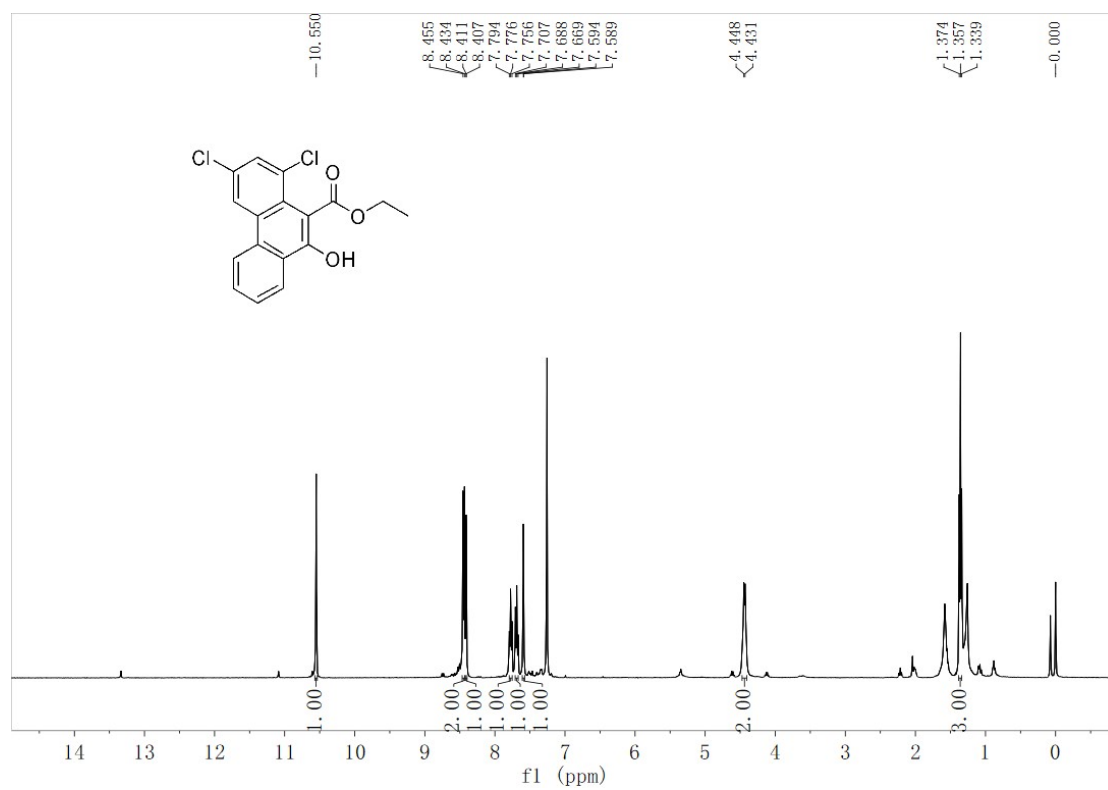

**2u** – <sup>13</sup>C NMR (101 MHz, CDCl<sub>3</sub>)

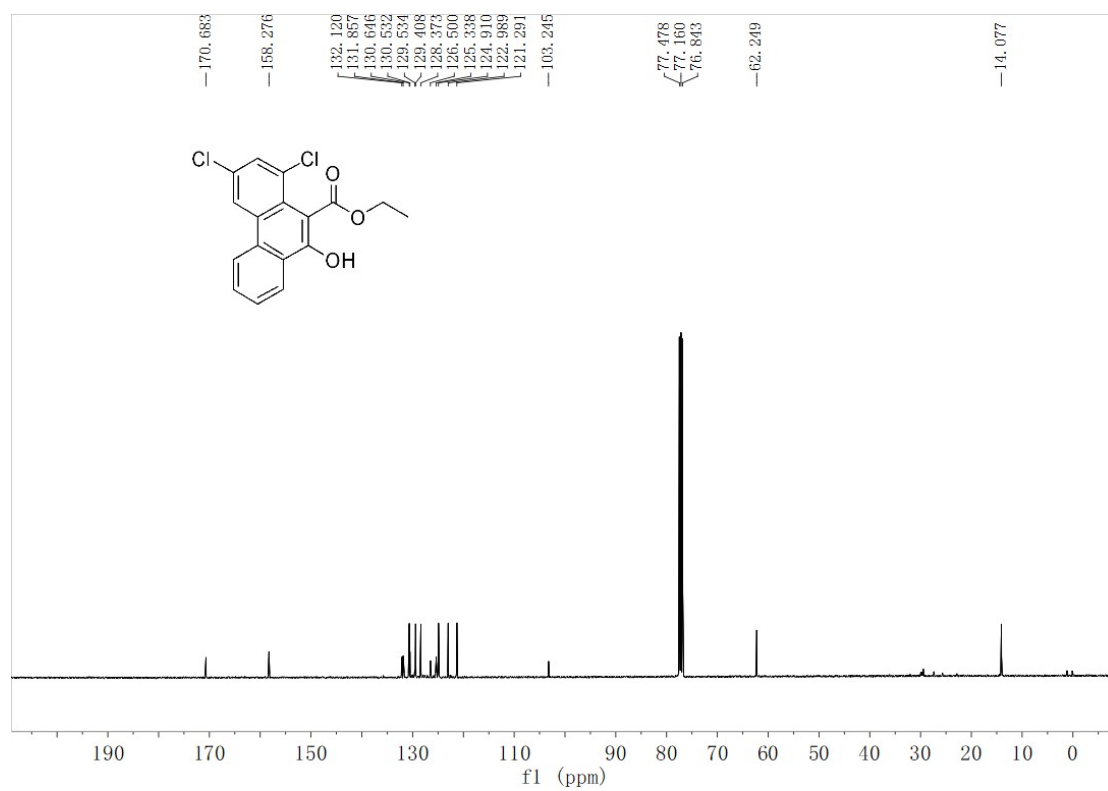

**2v** –  $^1\text{H}$  NMR (400 MHz,  $\text{CDCl}_3$ )

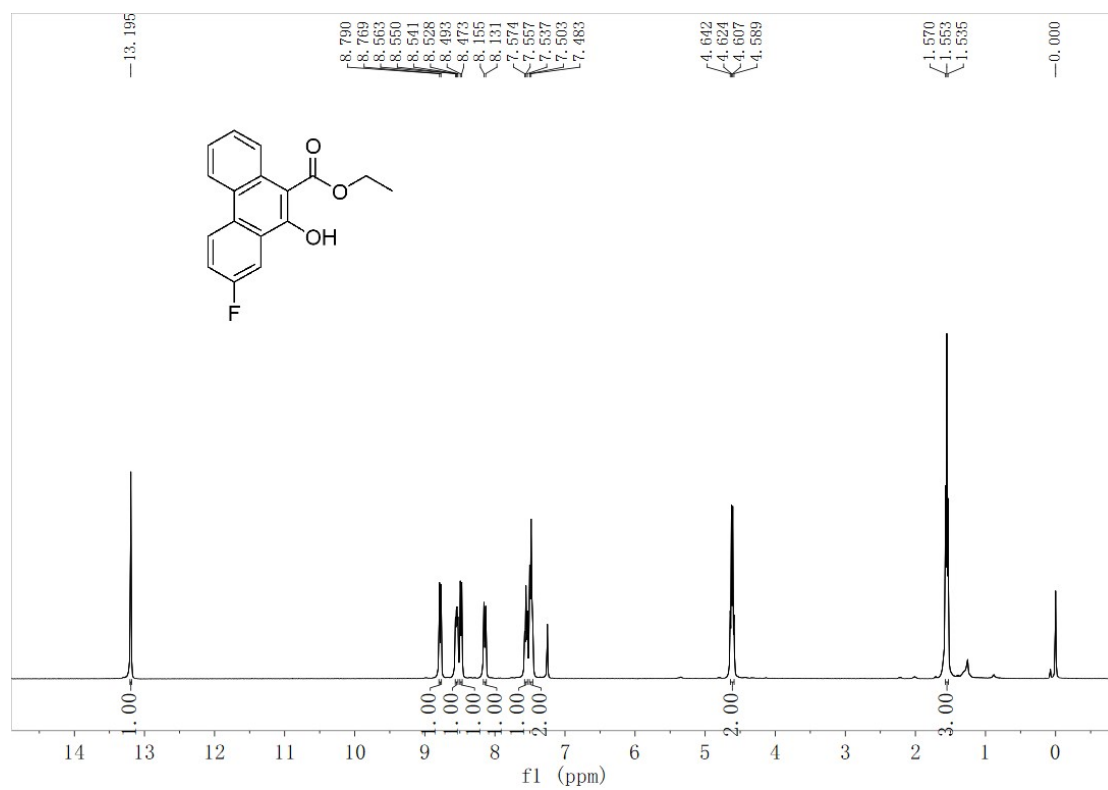

**2v** –  $^{13}\text{C}$  NMR (101 MHz,  $\text{CDCl}_3$ )

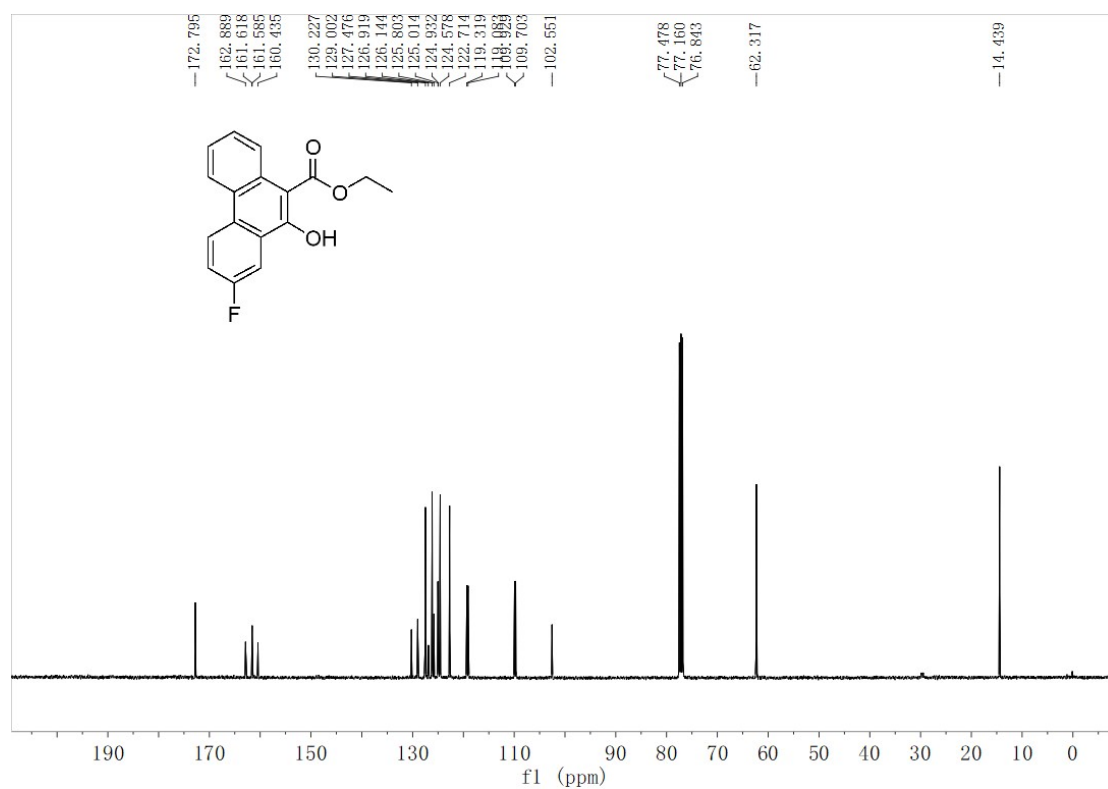

2v –  $^{19}\text{F}$  NMR (377 MHz,  $\text{CDCl}_3$ )

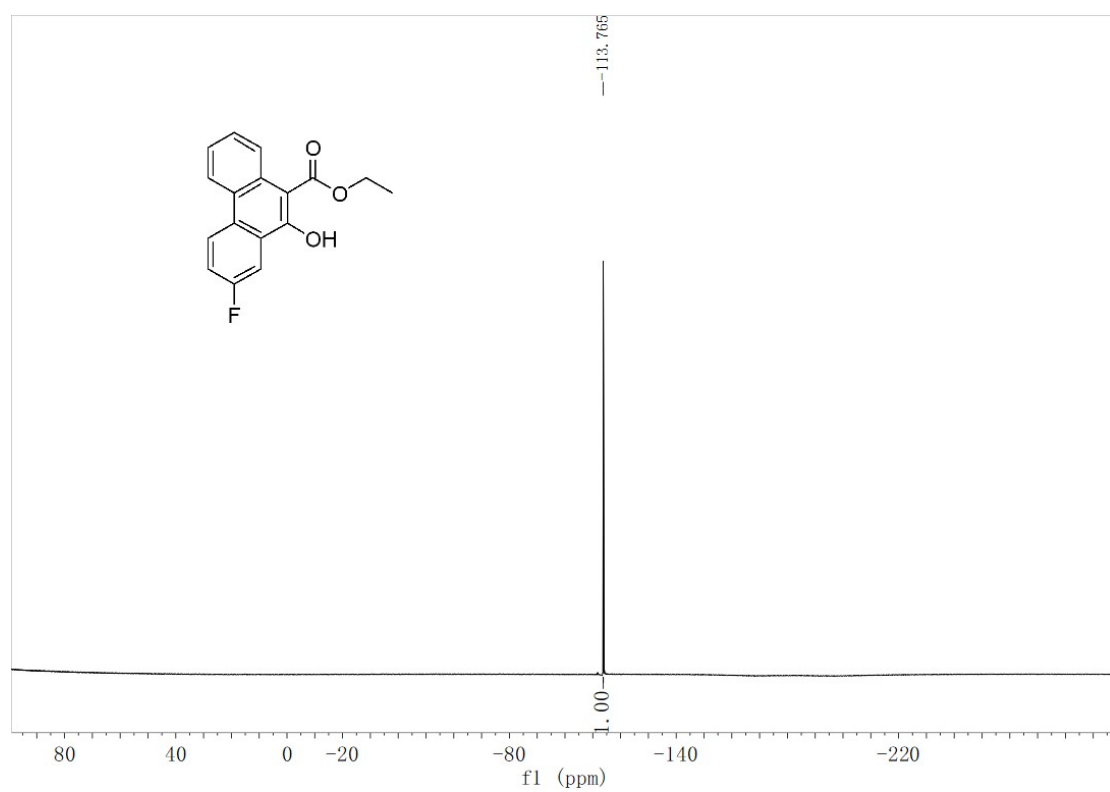

**2w** – <sup>1</sup>H NMR (400 MHz, CDCl<sub>3</sub>)

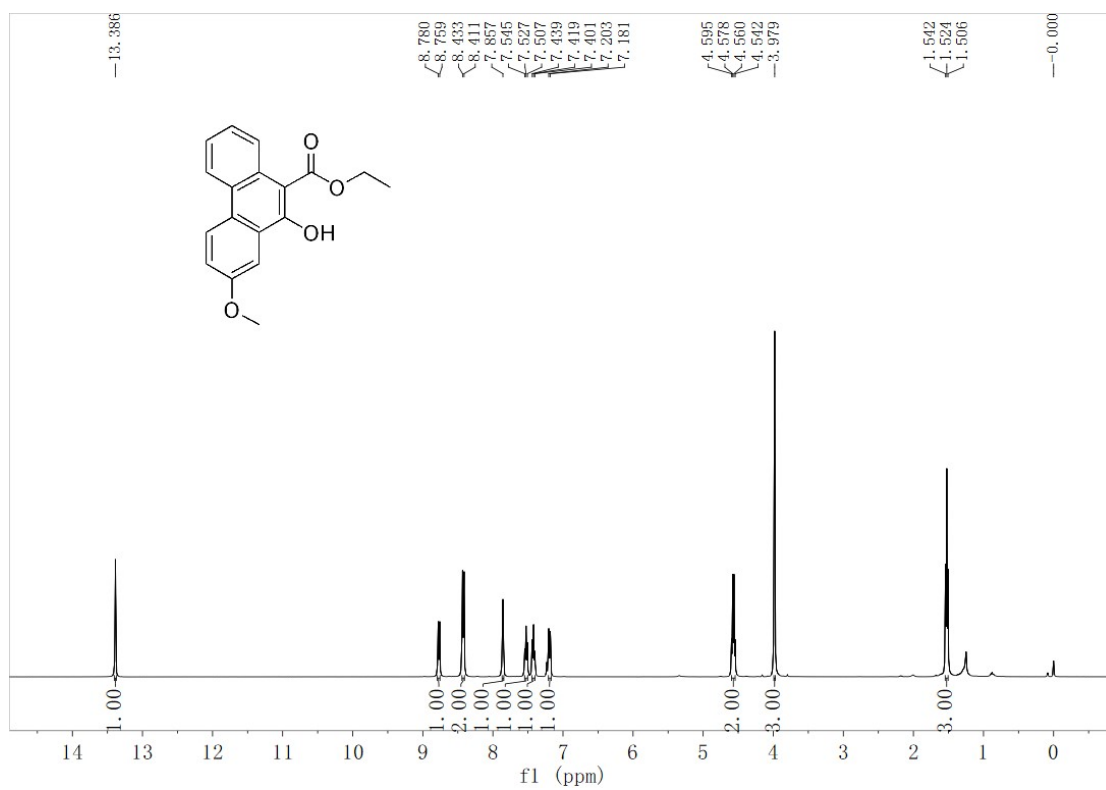

**2w** – <sup>13</sup>C NMR (101 MHz, CDCl<sub>3</sub>)

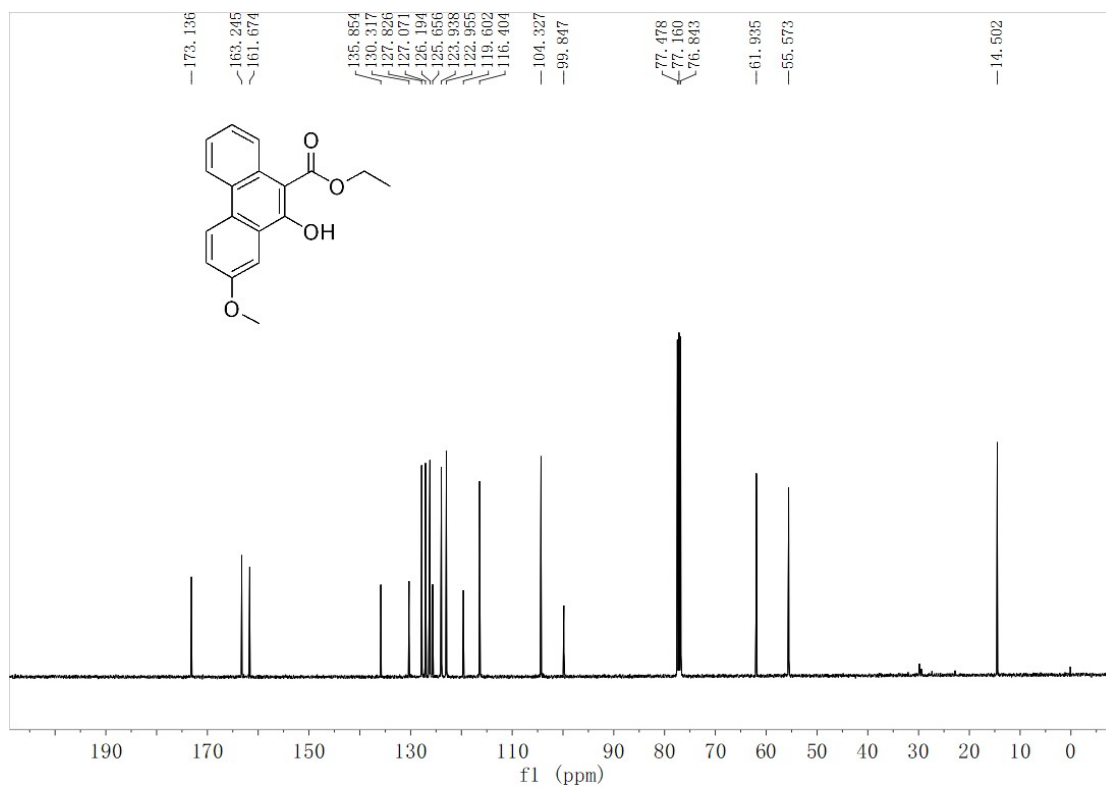

**2x** –  $^1\text{H}$  NMR (400 MHz,  $\text{CDCl}_3$ )

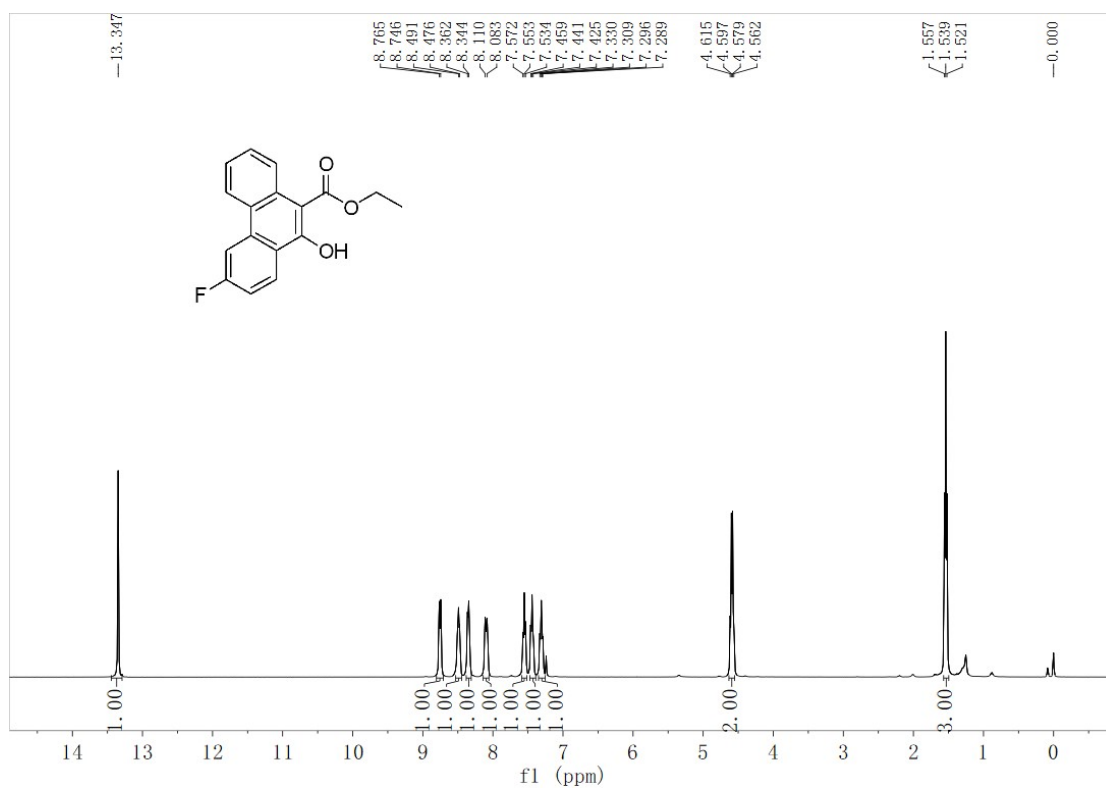

**2x** –  $^{13}\text{C}$  NMR (101 MHz,  $\text{CDCl}_3$ )

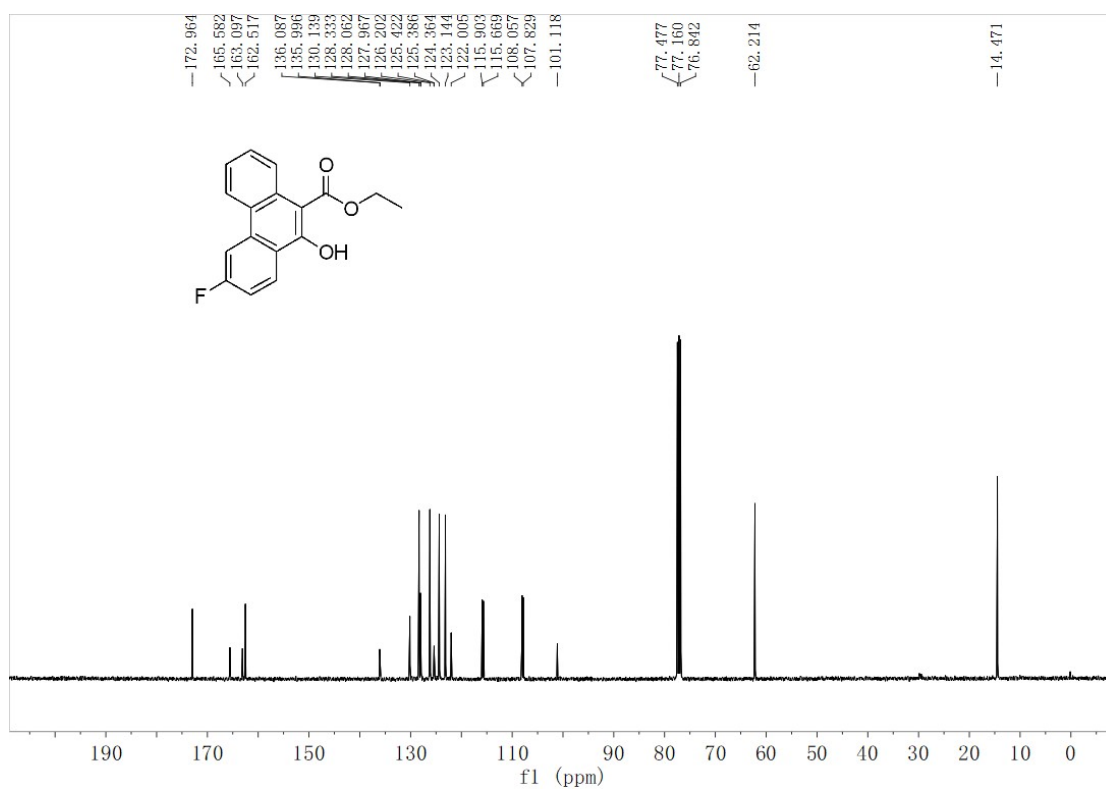

2x - <sup>19</sup>F NMR (377 MHz, CDCl<sub>3</sub>)

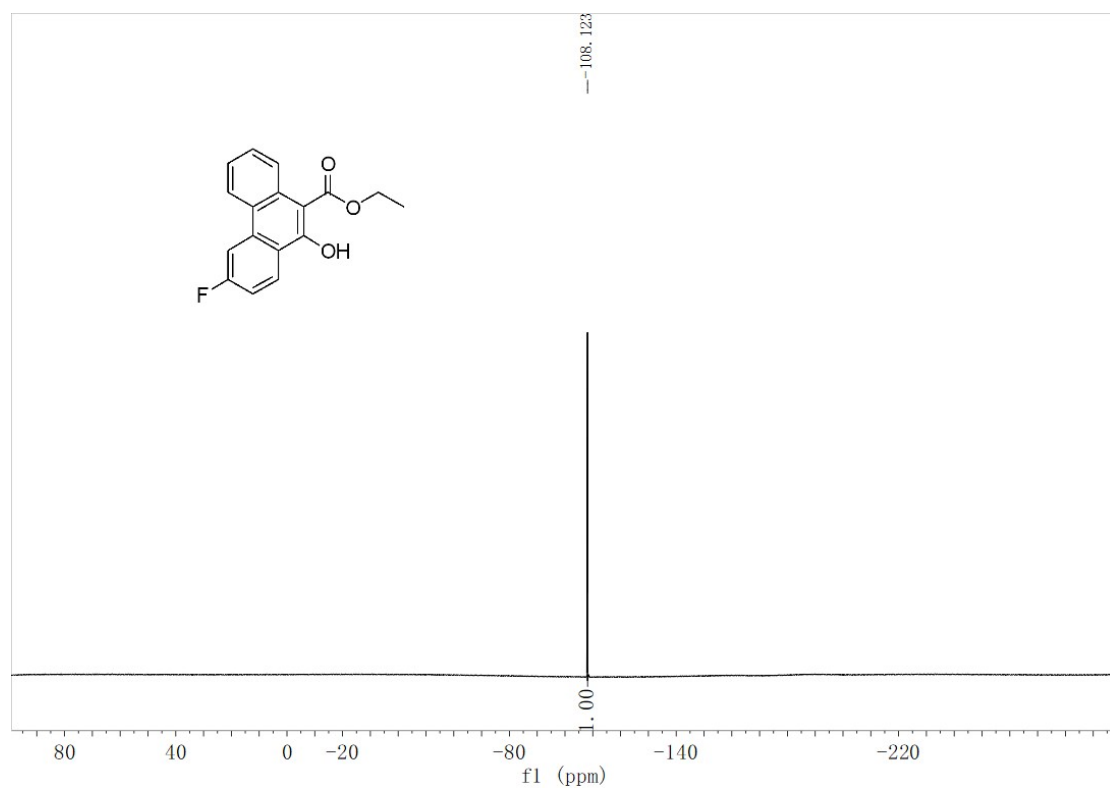

**2y** – <sup>1</sup>H NMR (400 MHz, CDCl<sub>3</sub>)

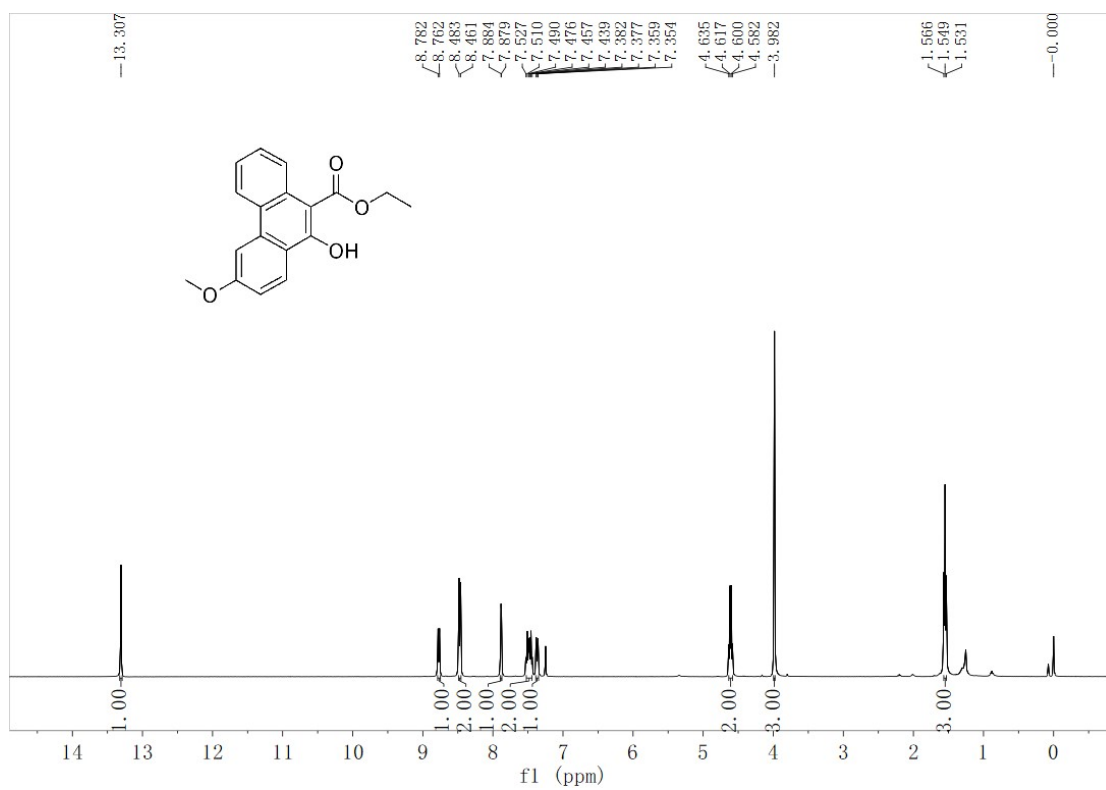

**2y** – <sup>13</sup>C NMR (101 MHz, CDCl<sub>3</sub>)

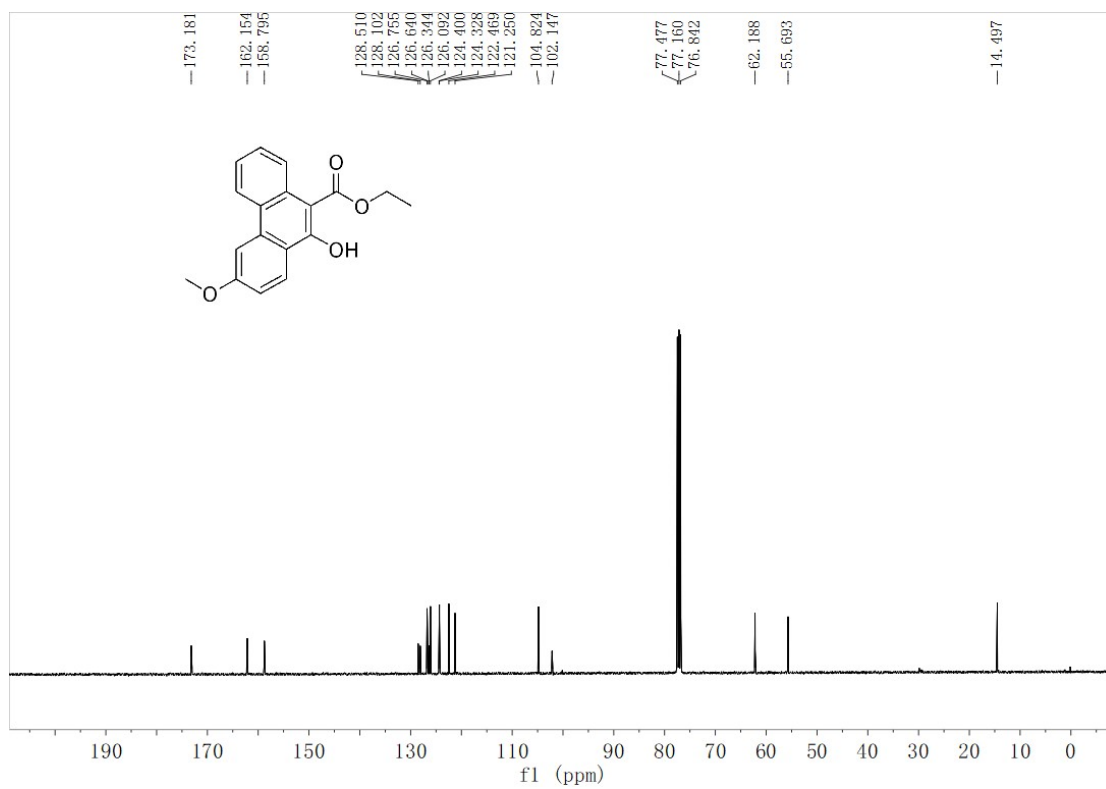



**2z** – <sup>1</sup>H NMR (400 MHz, CDCl<sub>3</sub>)

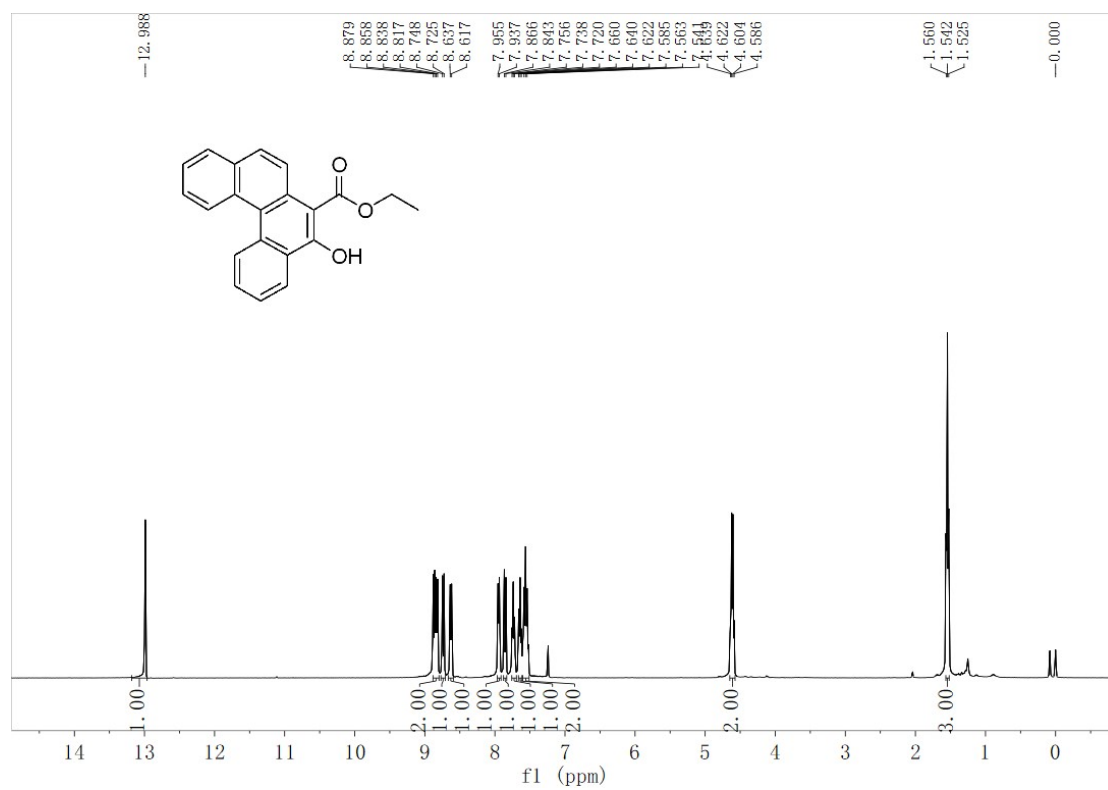

**2z** – <sup>13</sup>C NMR (101 MHz, CDCl<sub>3</sub>)

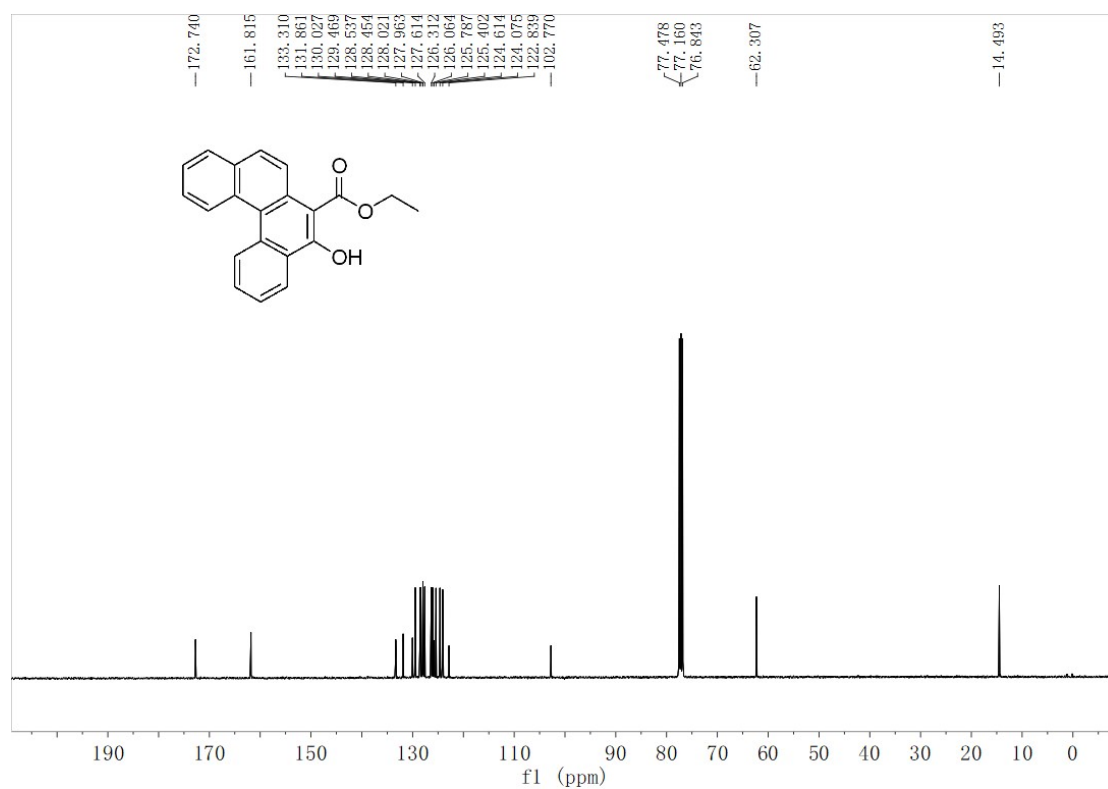

**2aa** –  $^1\text{H}$  NMR (400 MHz,  $\text{CDCl}_3$ )

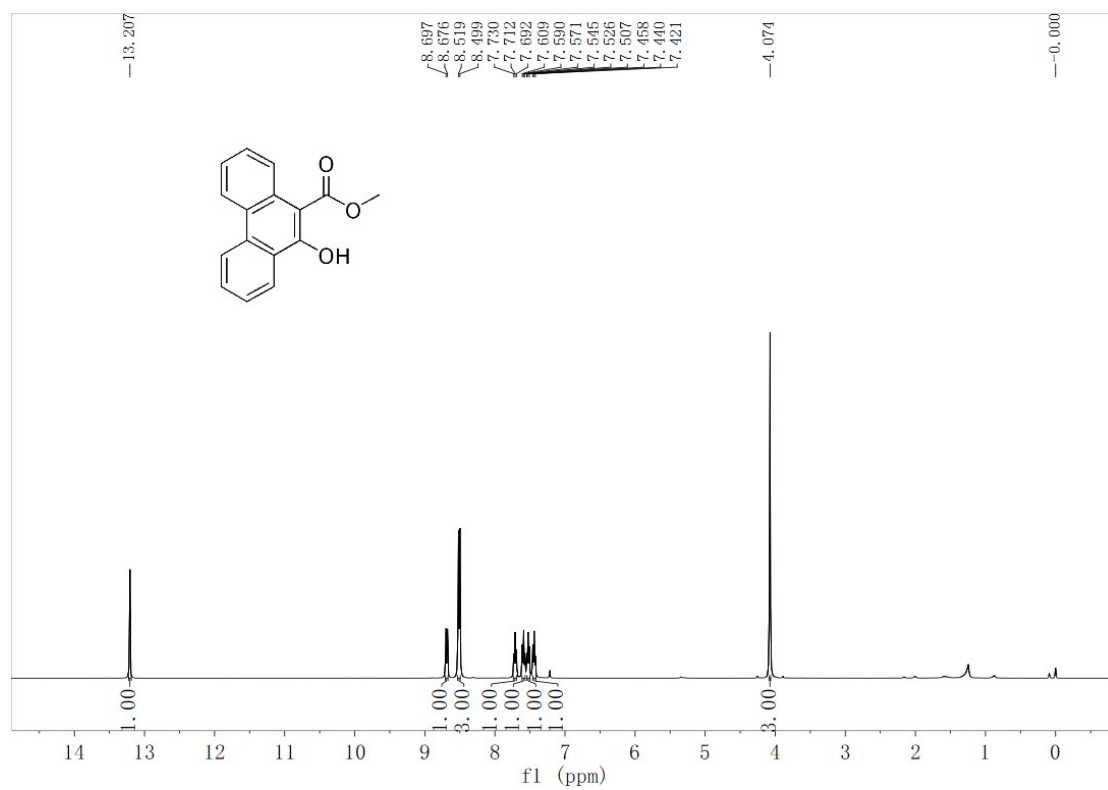

**2aa** –  $^{13}\text{C}$  NMR (101 MHz,  $\text{CDCl}_3$ )

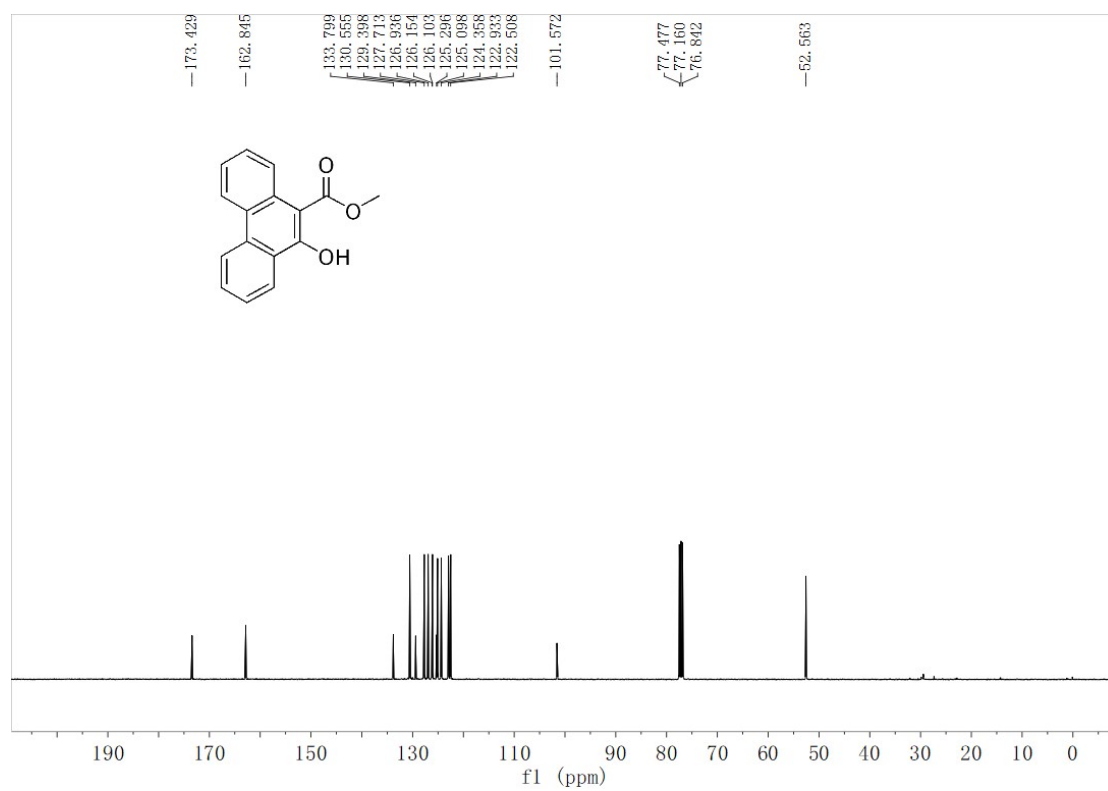

**2ab** –  $^1\text{H}$  NMR (400 MHz,  $\text{CDCl}_3$ )

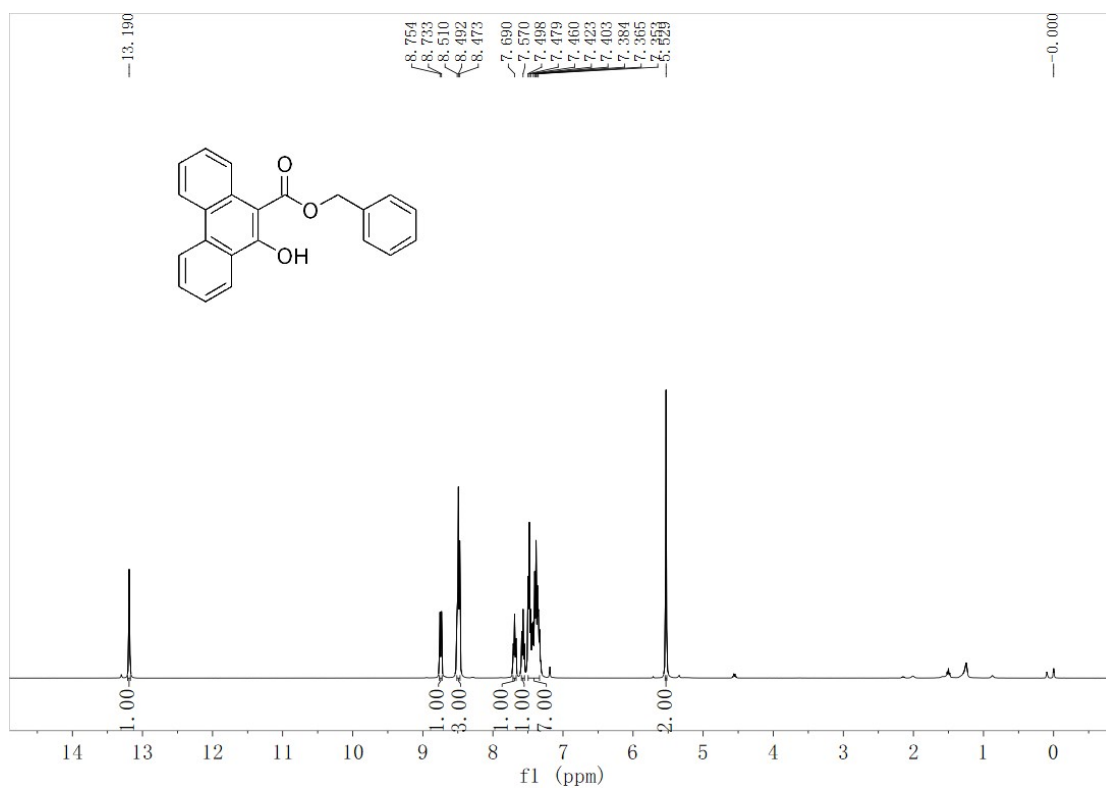

**2ab** –  $^{13}\text{C}$  NMR (101 MHz,  $\text{CDCl}_3$ )

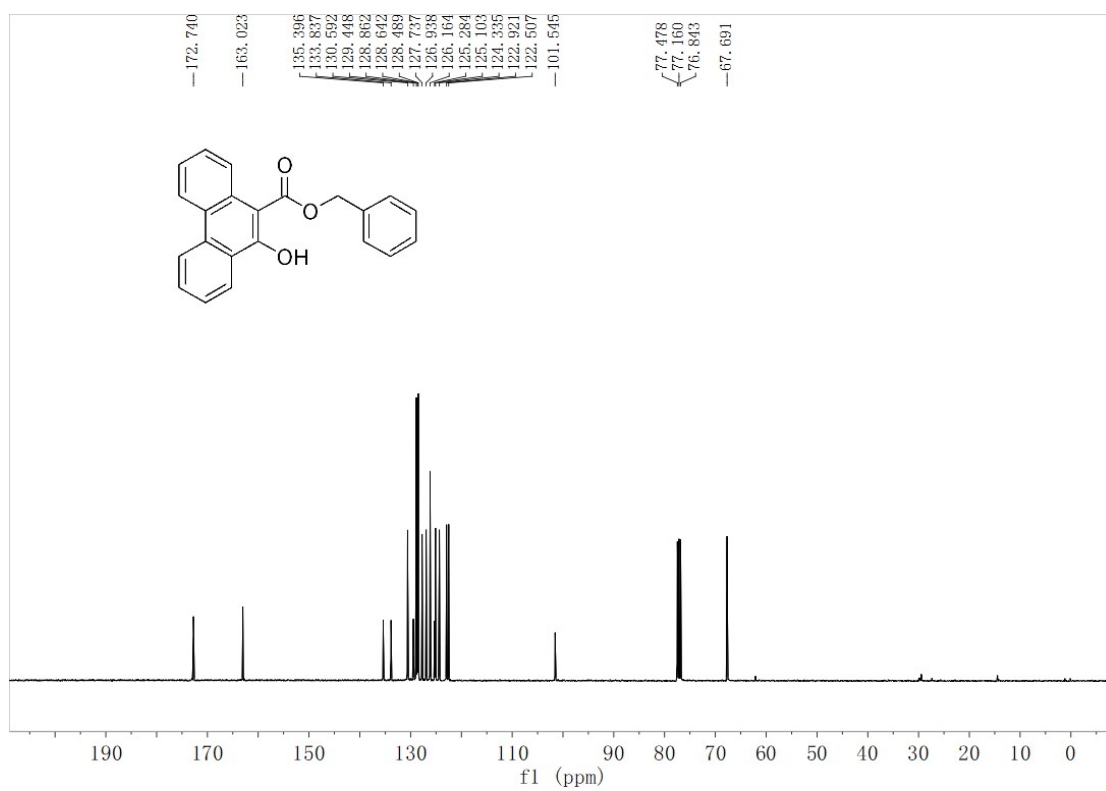

**2ac** –  $^1\text{H}$  NMR (400 MHz,  $\text{CDCl}_3$ )

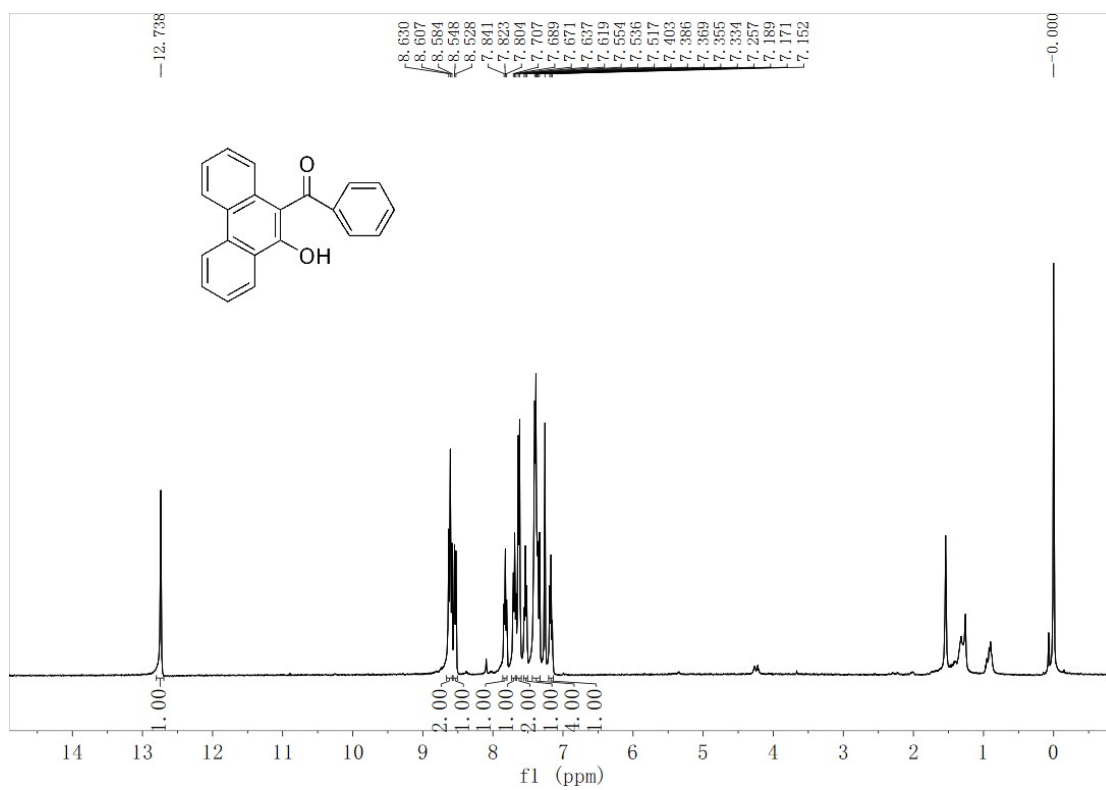

**2ac** –  $^{13}\text{C}$  NMR (101 MHz,  $\text{CDCl}_3$ )

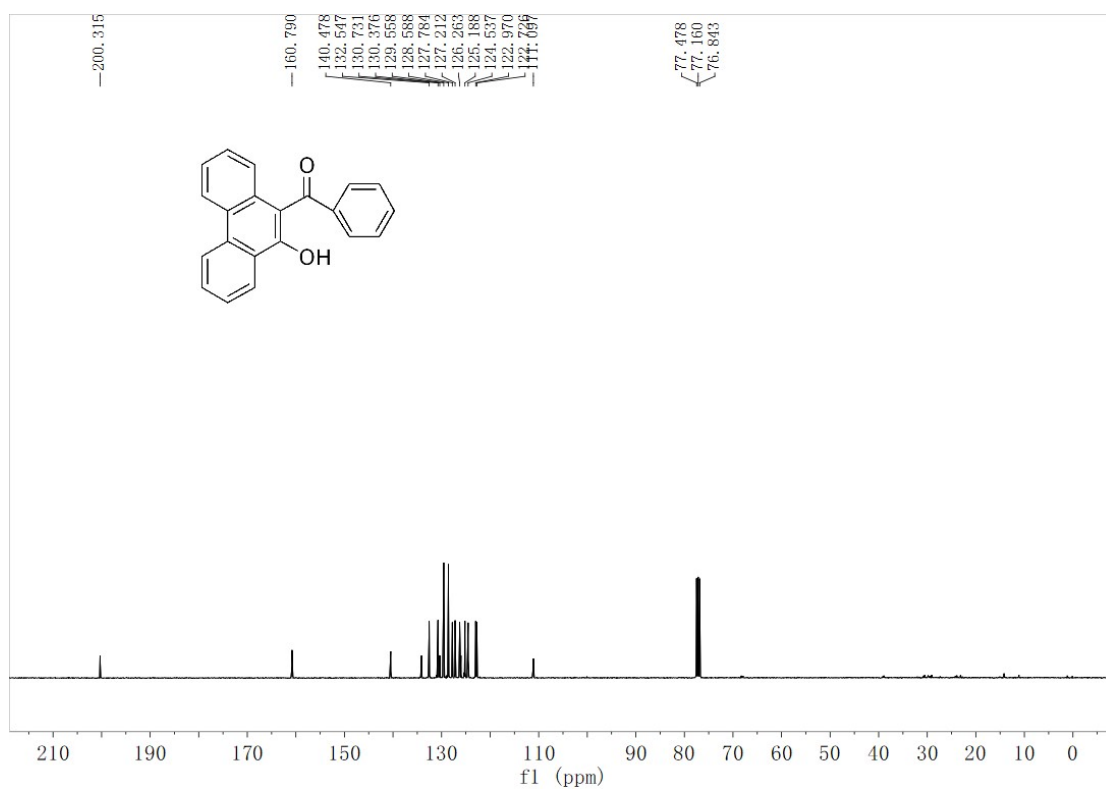

**2ad** – <sup>1</sup>H NMR (400 MHz, DMSO-*d*<sub>6</sub>)

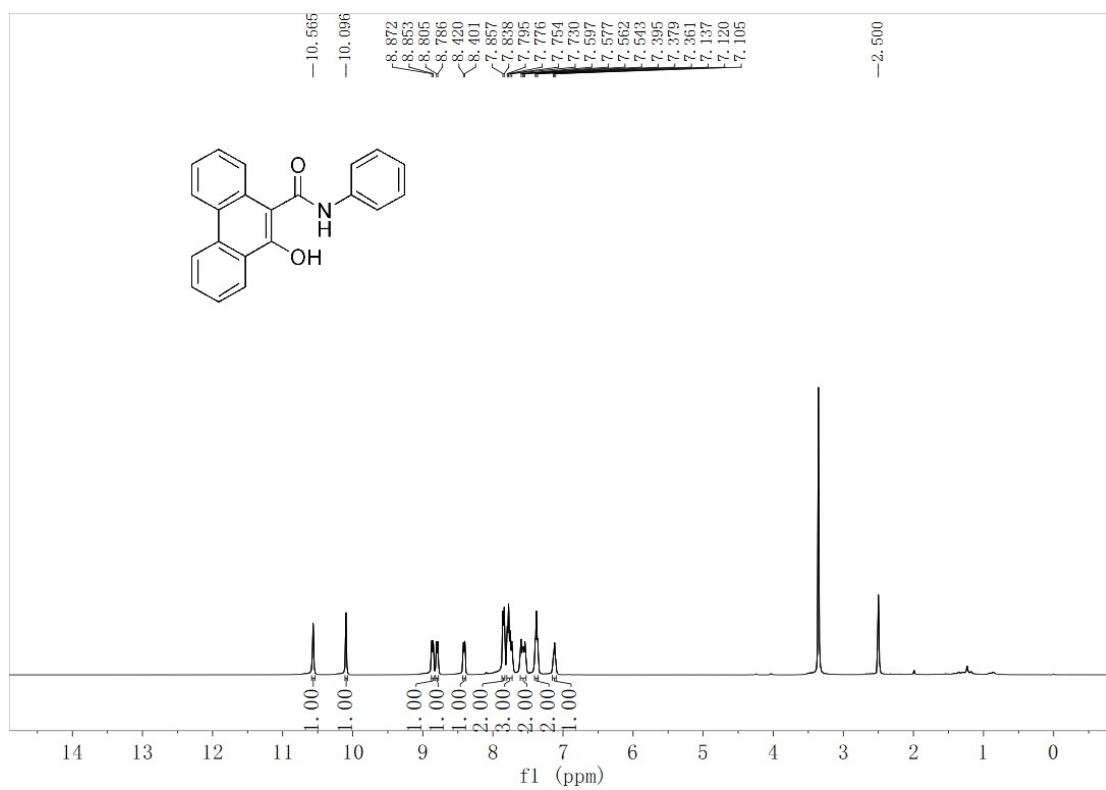

**2ad** – <sup>13</sup>C NMR (101 MHz, DMSO-*d*<sub>6</sub>)

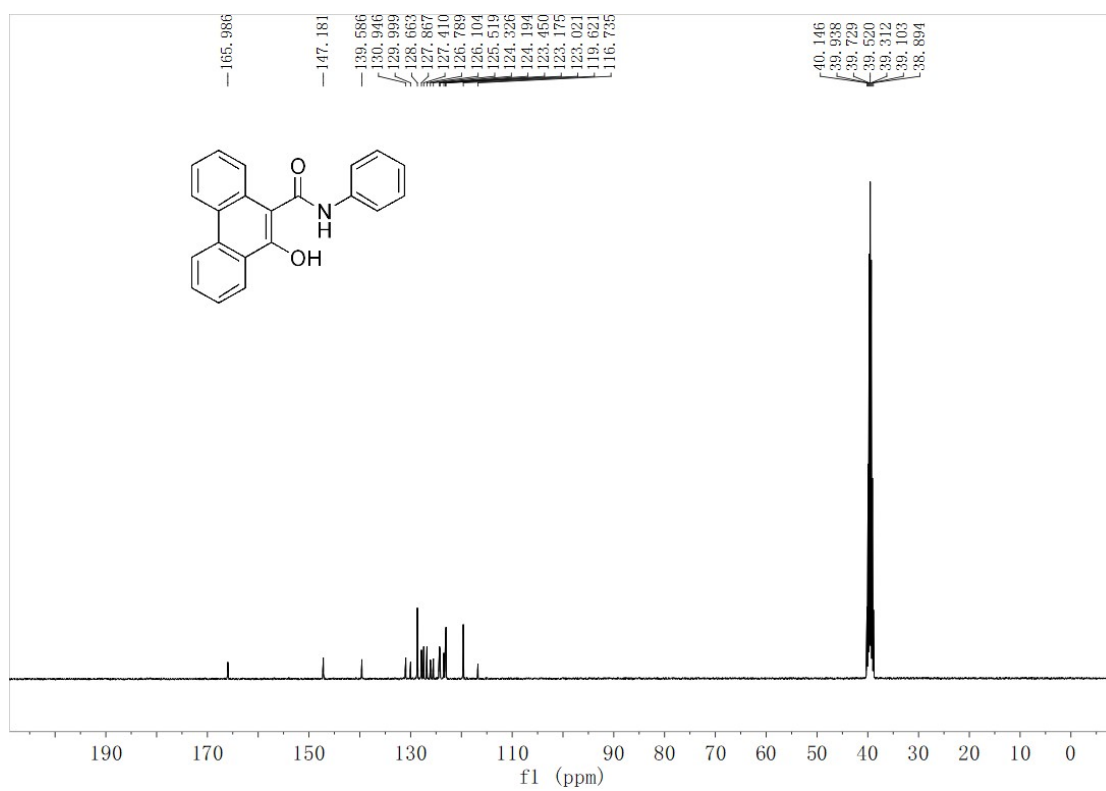

**2ae** –  $^1\text{H}$  NMR (400 MHz,  $\text{DMSO-}d_6$ )

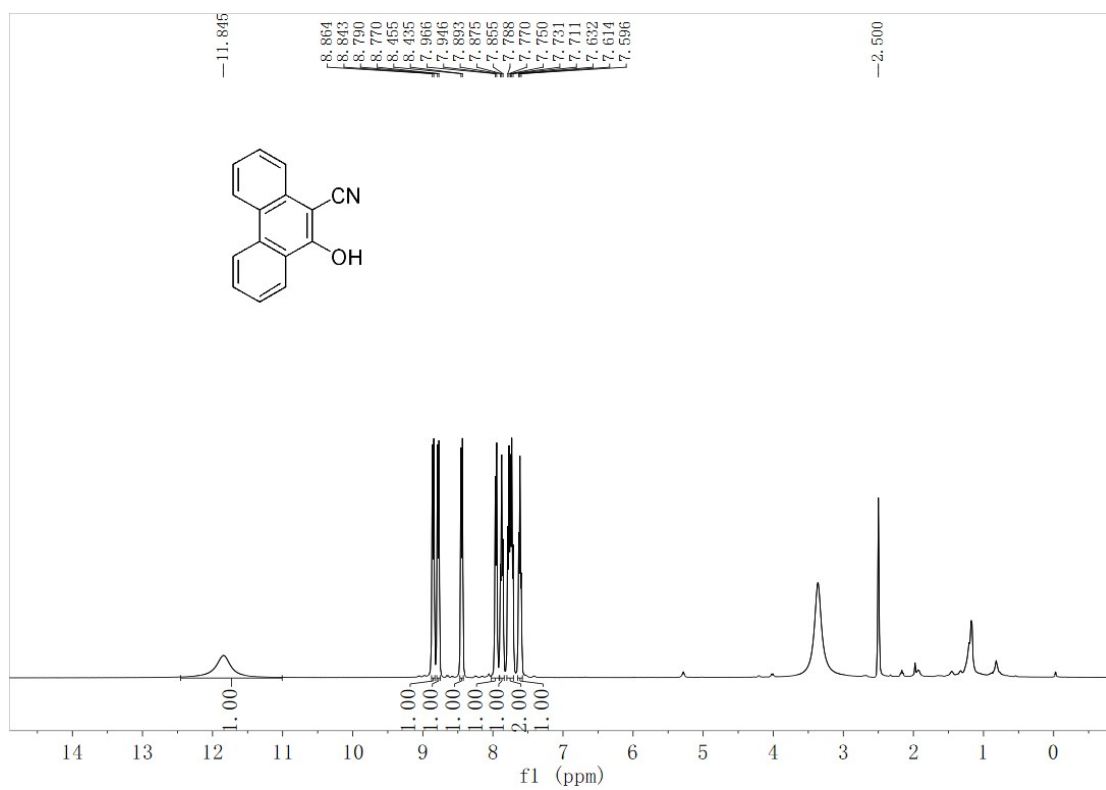

**2ae** –  $^{13}\text{C}$  NMR (101 MHz,  $\text{DMSO-}d_6$ )

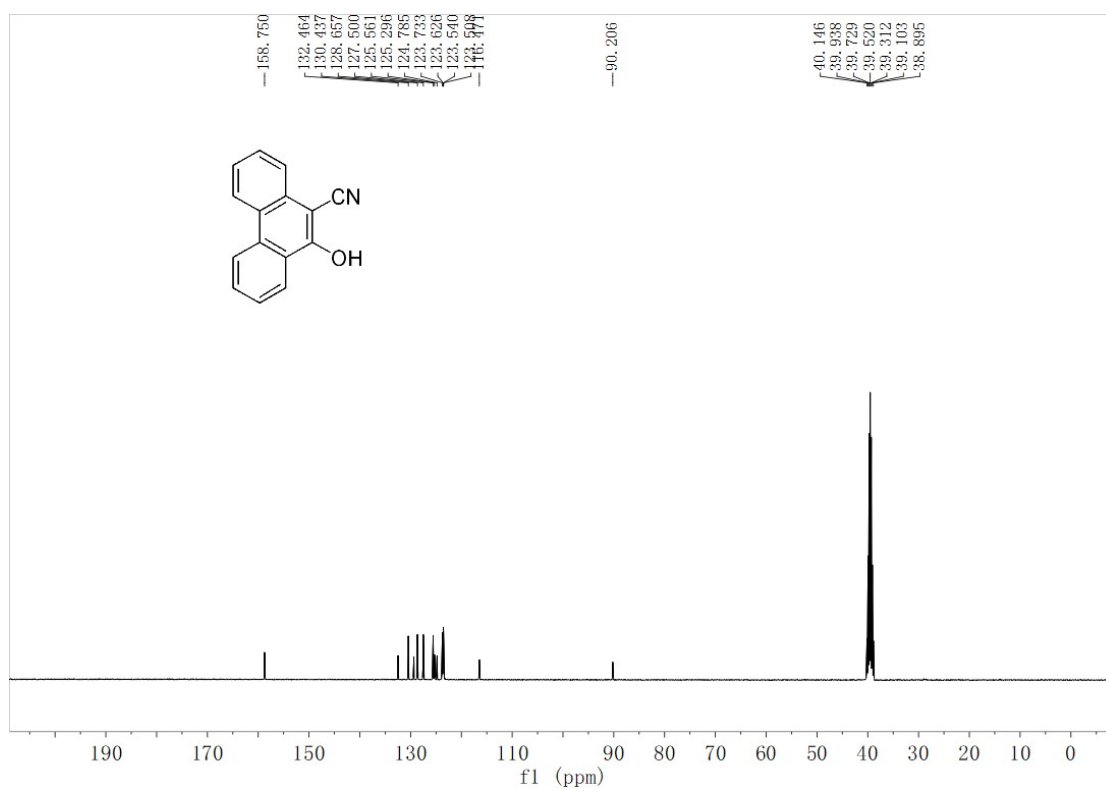

**2af** –  $^1\text{H}$  NMR (400 MHz,  $\text{CDCl}_3$ )

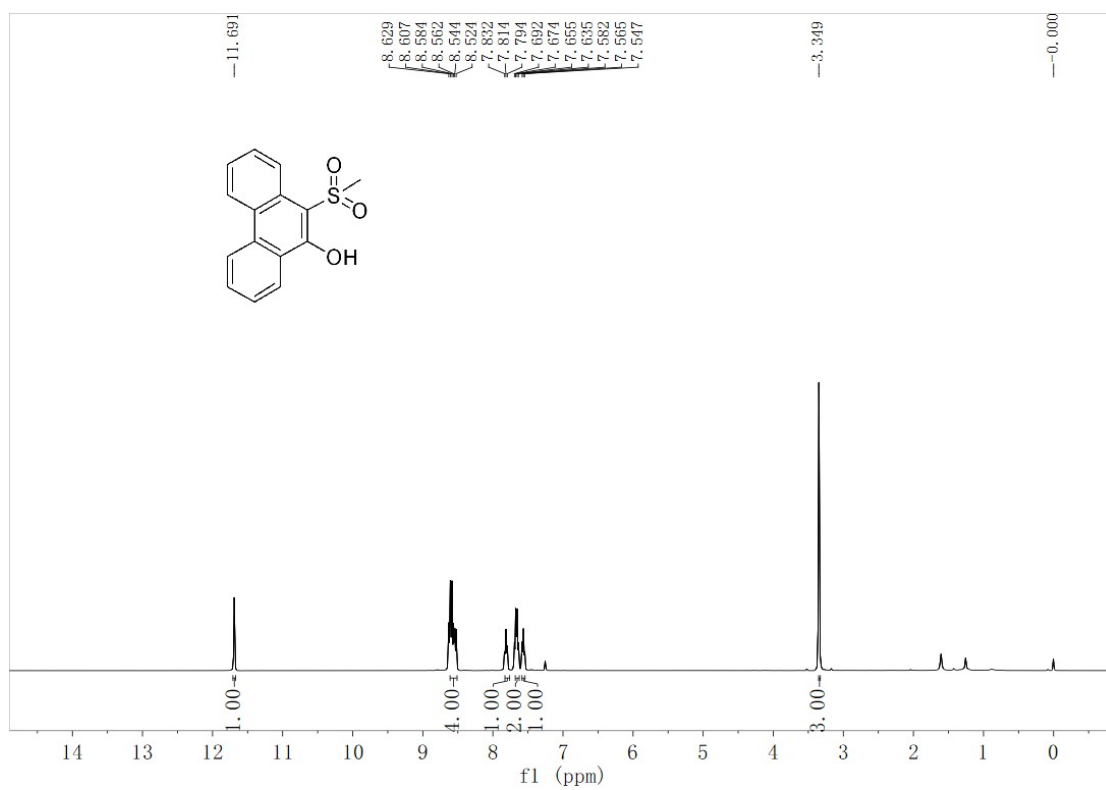

**2af** –  $^{13}\text{C}$  NMR (101 MHz,  $\text{CDCl}_3$ )

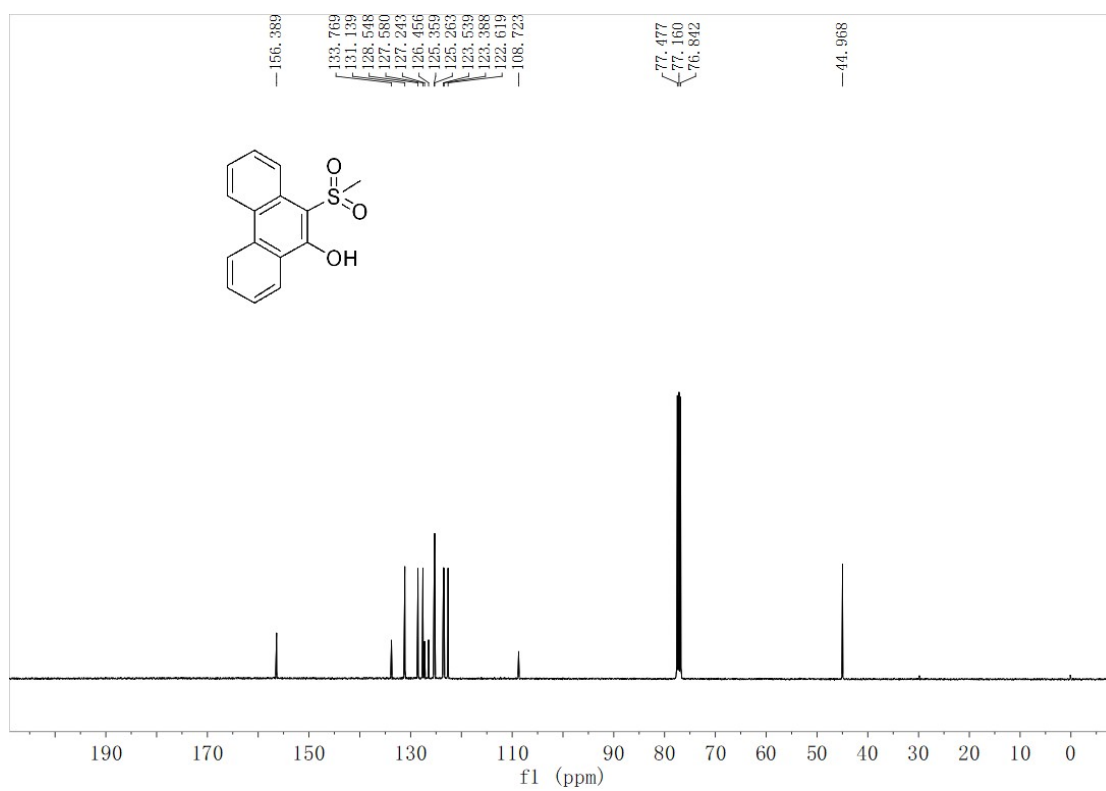

**2ag** – <sup>1</sup>H NMR (400 MHz, CDCl<sub>3</sub>)

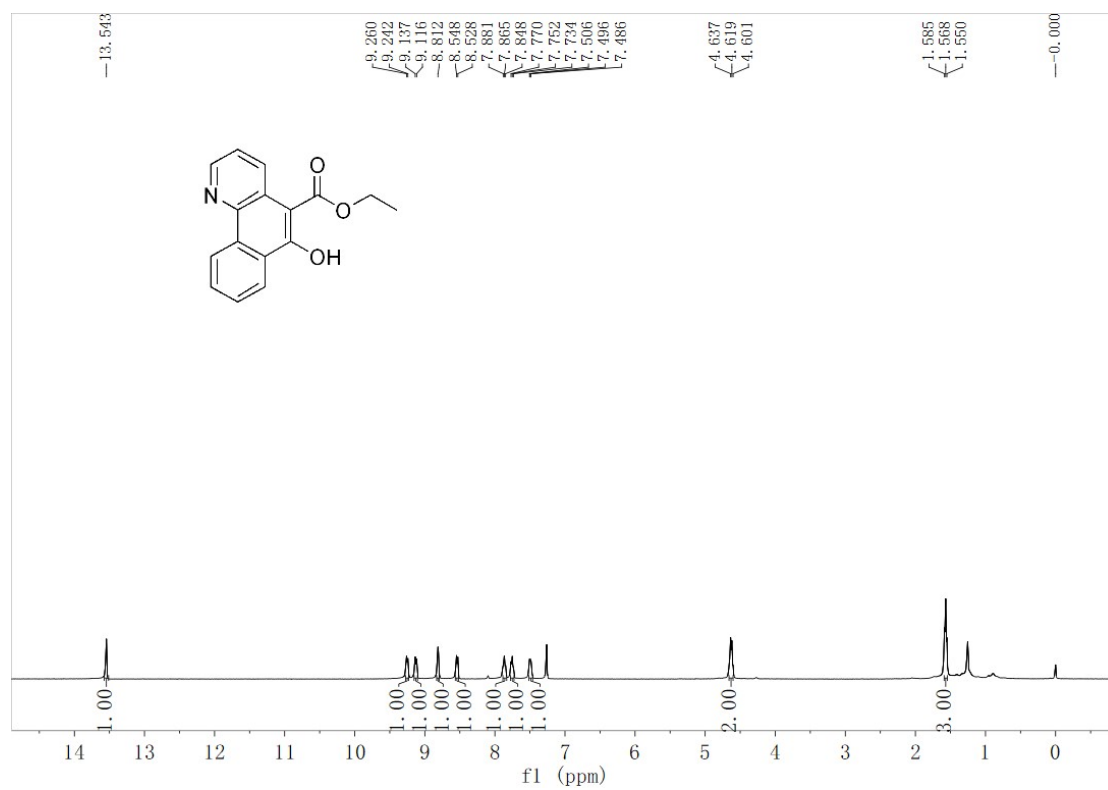

**2ag** – <sup>13</sup>C NMR (101 MHz, CDCl<sub>3</sub>)

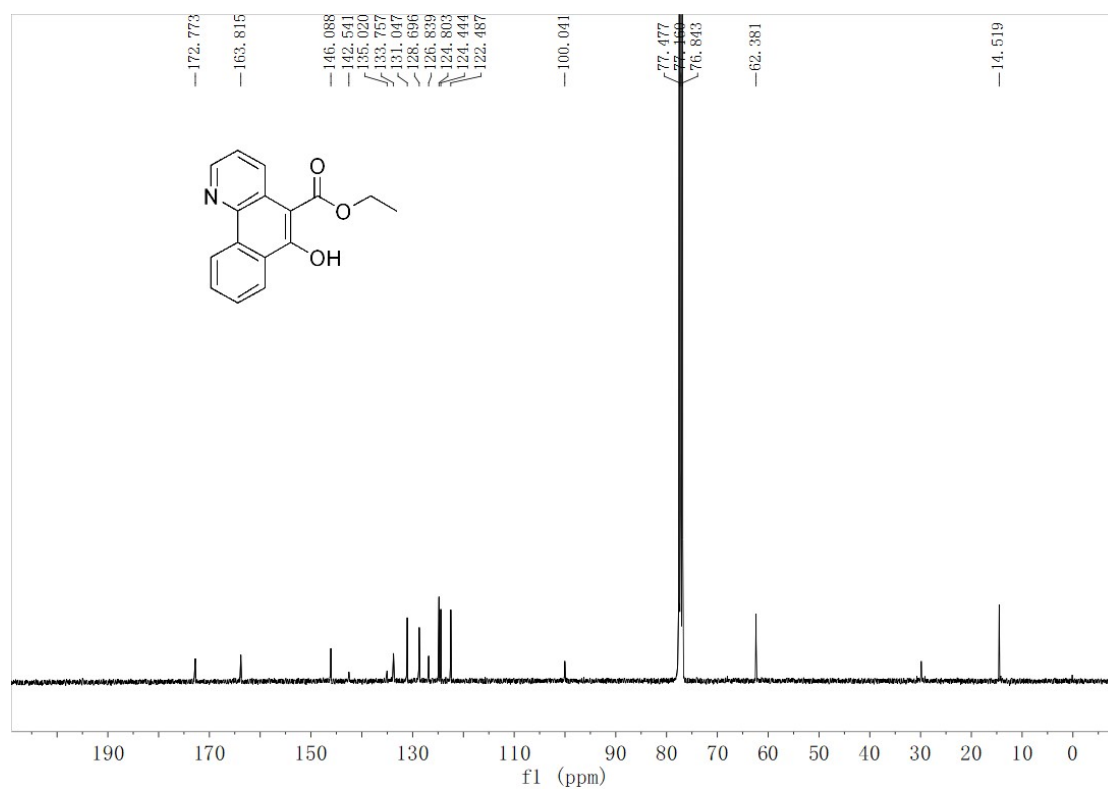



**2ah** – <sup>1</sup>H NMR (400 MHz, CDCl<sub>3</sub>)

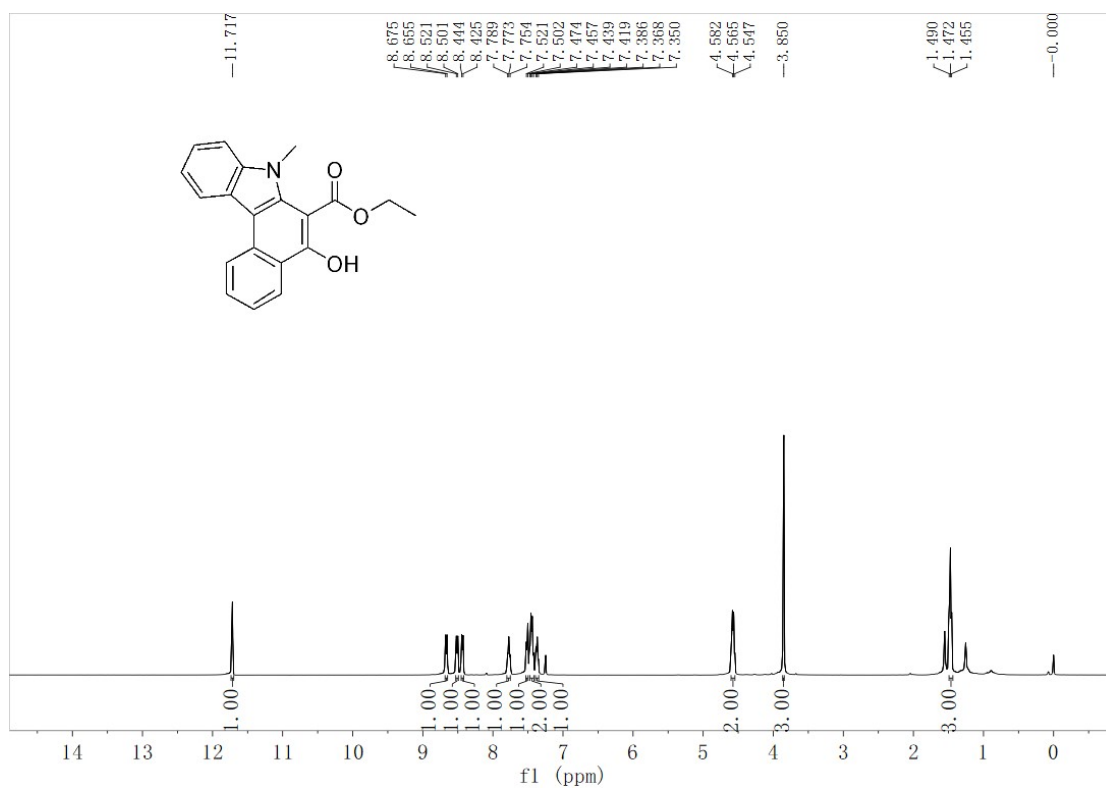

**2ah** – <sup>13</sup>C NMR (101 MHz, CDCl<sub>3</sub>)

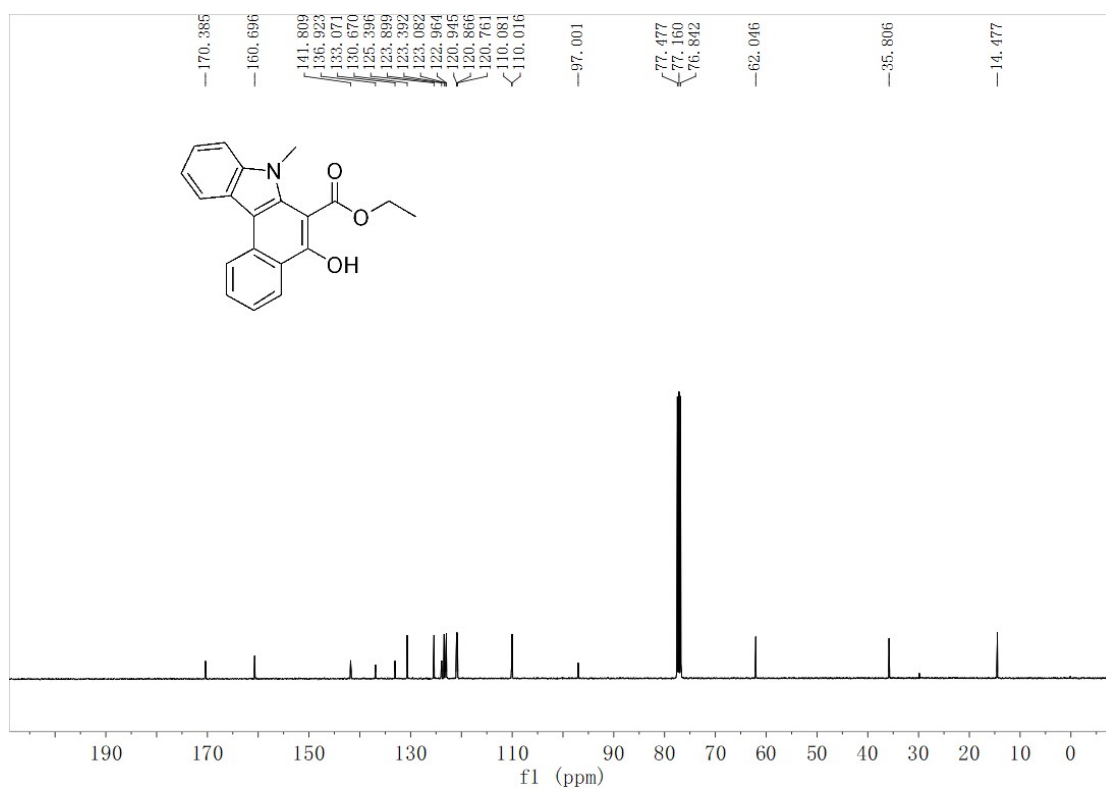

**2ai** – <sup>1</sup>H NMR (400 MHz, CDCl<sub>3</sub>)

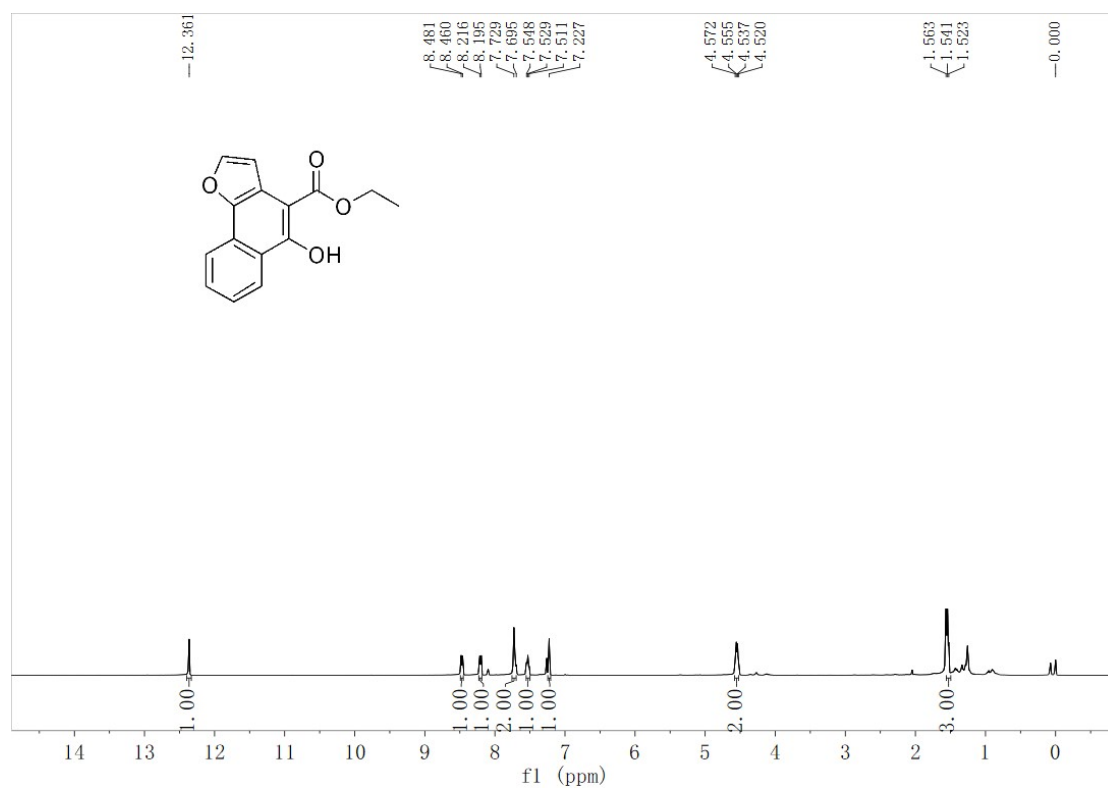

**2ai** – <sup>13</sup>C NMR (101 MHz, CDCl<sub>3</sub>)

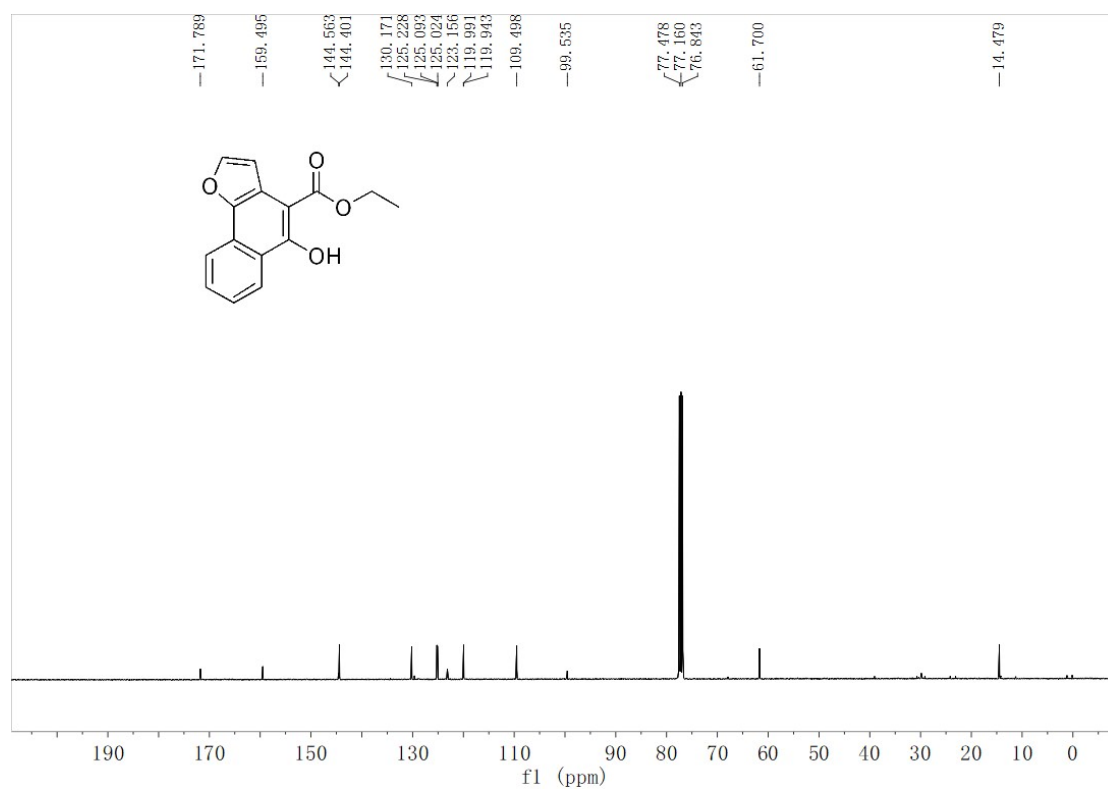

**2aj** – <sup>1</sup>H NMR (400 MHz, CDCl<sub>3</sub>)

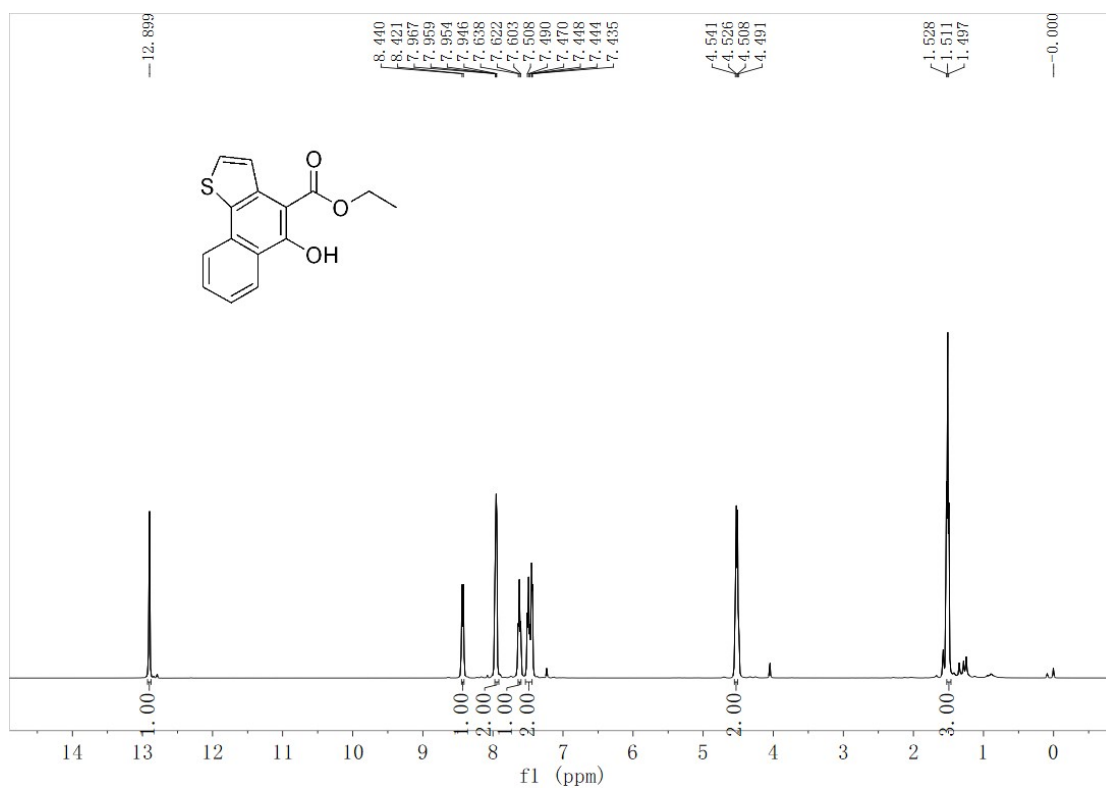

**2aj** – <sup>13</sup>C NMR (101 MHz, CDCl<sub>3</sub>)

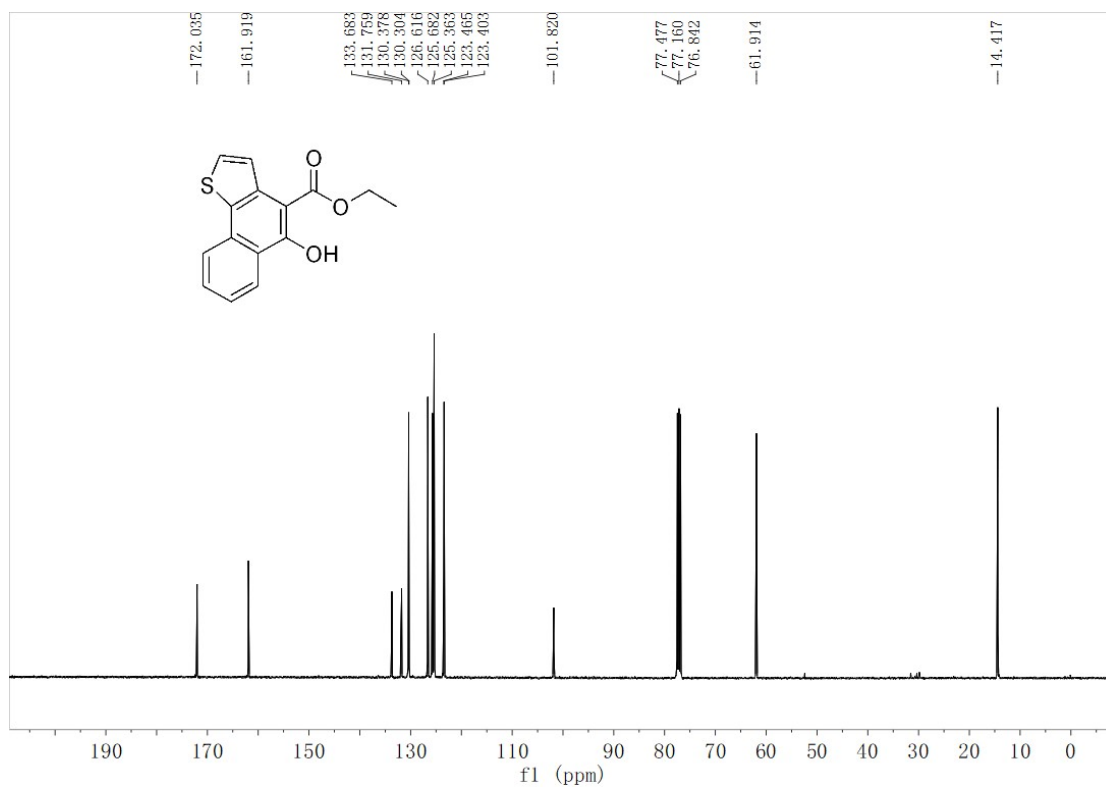

## 8. References

1. Y.-T. Jiang, Z.-Z. Yu, Y.-K. Zhang and B. Wang, *Org. Lett.*, 2018, **20**, 3728.
2. J.-D. Guo, X.-L. Yang, B. Chen, C.-H. Tung and L.-Z. Wu, *Org. Lett.*, 2020, **22**, 9627.
3. M.-H. Yang, J. R. Hunt, N. Sharifi and R. A. Altman, *Angew. Chem. Int. Ed.*, 2016, **55**, 9080.
4. K.-H. Chen, Y.-J. Chiang and J.-L. Zhu, *Org. Biomol. Chem.*, 2018, **16**, 8353.
5. (a) Y. Zou, G. Yue, J. Xu and J. S. Zhou, *Eur. J. Org. Chem.*, 2014, **2014**, 5901;  
(b) J. Yan, T. Ni and F. Yan, *Tetrahedron Lett.*, 2015, **56**, 1096.
6. B. Sreedhar, P. Surendra Reddy and M. Madhavi, *Synth. Commun.*, 2007, **37**, 4149.
